# Supplementary material
Source: PubMed Central journal article supplement (PMC3202514)
Supplement: supp_214.22.3808_JEB060244TableS1-S13.pdf [file supp_214.22.3808_JEB060244TableS1-S13.pdf]

Table S1. Primer sequences used for qPCR

| Gene Name | Gene ID | Primer Start | Primer Sequence              |
|-----------|---------|--------------|------------------------------|
| thiolase  | GB12182 | 843F         | GAAACCAGCATTGTAAACCATATG     |
| thiolase  | GB12182 | 920R         | GCTGCTGATGCACCATCAGT         |
| CPT1      | GB11897 | 394F         | CCGCATGGTCAAACCTTCATTAA      |
| CPT1      | GB11897 | 491R         | ACACCATAACCATCATCAGCTACAG    |
| lsd2      | GB14434 | 580F         | CCAGTATCTGCCGATGAGAACA       |
| lsd2      | GB14434 | 650R         | GCGGTTTTTCGTGGATAATTGTC      |
| Vg        | ApisVg- | 492F         | AGTTCCGACCGACGACG            |
| Vg        | ApisVg- | 554R         | TTCCCTCCACGGAGTCC            |
| JHE       | GB15327 | 23F          | TTCTTTCTTCTCTTGACTTTTGGTT    |
| JHE       | GB15327 | 101R         | CCCTTAATTGCACCTAAAGGAGTTT    |
| JHEH      | GB10771 | 454F         | TTAACAAAACCTTGGCCTAATCAAA    |
| JHEH      | GB10771 | 528R         | GGAGAAACCGTATCCAGGAAGTG      |
| ilp2      | GB10174 | 9F           | CCAATATTATGGTCGAACTTTGTCA    |
| ilp2      | GB10174 | 74R          | CGAGAATTATAAACTACCGCACAT     |
| inR1      | GB30322 | 1907F        | TTCCGTGTACCACGGCAGA          |
| inR1      | GB30322 | 1979R        | GGTGCAAAGTACGCGTGAGA         |
| npfR      | GB30377 | 232F         | AATTTGGCATTGAGCGATGTT        |
| npfR      | GB30377 | 302R         | CCGAGGAACGTGTACAATGGT        |
| akhR      | GB16857 | 291F         | TTGGGCGATCACTGTTTCCT         |
| akhR      | GB16857 | 377R         | GATGATAAGTACAGGCCAAACATTCTAA |
| eIFIII-S8 | GB12747 | 1637F        | TGAGTGTCTGCTATGGATTGCAA      |
| eIFIII-S8 | GB12747 | 1718R        | TCGCGGCTCGTGGTAAA            |

Table S2. Gene Ontology terms with a directional bias toward foragers (F)&gt;nurses (N)

| Term                                                                             | P Value  | Category F>N | Category N<F | Total F>N | Total N<F |
|----------------------------------------------------------------------------------|----------|--------------|--------------|-----------|-----------|
| GO:0065007~biological regulation                                                 | 7.91E-05 | 147          | 60           | 591       | 410       |
| GO:0051179~localization                                                          | 2.51E-04 | 182          | 84           | 591       | 410       |
| GO:0048749~compound eye development                                              | 5.98E-04 | 28           | 3            | 591       | 410       |
| GO:0007243~protein kinase cascade                                                | 9.20E-04 | 18           | 0            | 591       | 410       |
| GO:0001745~compound eye morphogenesis                                            | 1.00E-03 | 24           | 2            | 591       | 410       |
| GO:0051234~establishment of localization                                         | 1.08E-03 | 152          | 70           | 591       | 410       |
| GO:0050896~response to stimulus                                                  | 1.11E-03 | 99           | 39           | 591       | 410       |
| GO:0007560~imaginal disc morphogenesis                                           | 1.26E-03 | 36           | 7            | 591       | 410       |
| GO:0006810~transport                                                             | 1.60E-03 | 150          | 70           | 591       | 410       |
| GO:0002164~larval development                                                    | 1.68E-03 | 44           | 11           | 591       | 410       |
| GO:0002117~larval development (sensu Amphibia)                                   | 1.96E-03 | 37           | 8            | 591       | 410       |
| GO:0007552~metamorphosis                                                         | 1.96E-03 | 37           | 8            | 591       | 410       |
| GO:0050789~regulation of biological process                                      | 1.99E-03 | 124          | 55           | 591       | 410       |
| GO:0001654~eye development                                                       | 2.02E-03 | 30           | 5            | 591       | 410       |
| GO:0050793~regulation of developmental process                                   | 2.35E-03 | 22           | 2            | 591       | 410       |
| GO:0048592~eye morphogenesis                                                     | 2.50E-03 | 27           | 4            | 591       | 410       |
| GO:0016043~cellular component organization and biogenesis                        | 2.71E-03 | 165          | 81           | 591       | 410       |
| GO:0032502~developmental process                                                 | 2.89E-03 | 155          | 75           | 591       | 410       |
| GO:0007444~imaginal disc development                                             | 3.03E-03 | 40           | 10           | 591       | 410       |
| GO:0051188~cofactor biosynthetic process                                         | 3.03E-03 | 24           | 3            | 591       | 410       |
| GO:0006796~phosphate metabolic process                                           | 3.22E-03 | 71           | 26           | 591       | 410       |
| GO:0006793~phosphorus metabolic process                                          | 3.22E-03 | 71           | 26           | 591       | 410       |
| GO:0042221~response to chemical stimulus                                         | 3.56E-03 | 33           | 7            | 591       | 410       |
| GO:0006119~oxidative phosphorylation                                             | 4.61E-03 | 30           | 6            | 591       | 410       |
| GO:0007423~sensory organ development                                             | 4.97E-03 | 32           | 7            | 591       | 410       |
| GO:0000165~MAPKKK cascade                                                        | 6.29E-03 | 14           | 0            | 591       | 410       |
| GO:0009887~organ morphogenesis                                                   | 7.59E-03 | 43           | 13           | 591       | 410       |
| GO:0051641~cellular localization                                                 | 8.21E-03 | 67           | 26           | 591       | 410       |
| GO:0065008~regulation of biological quality                                      | 9.50E-03 | 30           | 7            | 591       | 410       |
| GO:0000902~cell morphogenesis                                                    | 9.82E-03 | 44           | 14           | 591       | 410       |
| GO:0032989~cellular structure morphogenesis                                      | 9.82E-03 | 44           | 14           | 591       | 410       |
| GO:0009790~embryonic development                                                 | 1.01E-02 | 38           | 11           | 591       | 410       |
| GO:0009653~anatomical structure morphogenesis                                    | 1.09E-02 | 78           | 33           | 591       | 410       |
| GO:0007275~multicellular organismal development                                  | 1.09E-02 | 128          | 63           | 591       | 410       |
| GO:0035214~eye-antennal disc development                                         | 1.18E-02 | 25           | 5            | 591       | 410       |
| GO:0007455~eye-antennal disc morphogenesis                                       | 1.18E-02 | 25           | 5            | 591       | 410       |
| GO:0001751~compound eye photoreceptor cell differentiation                       | 1.19E-02 | 18           | 2            | 591       | 410       |
| GO:0030154~cell differentiation                                                  | 1.32E-02 | 89           | 40           | 591       | 410       |
| GO:0007610~behavior                                                              | 1.35E-02 | 33           | 9            | 591       | 410       |
| GO:0009108~coenzyme biosynthetic process                                         | 1.39E-02 | 20           | 3            | 591       | 410       |
| GO:0048869~cellular developmental process                                        | 1.50E-02 | 90           | 41           | 591       | 410       |
| GO:0007254~JNK cascade                                                           | 1.60E-02 | 12           | 0            | 591       | 410       |
| GO:0031098~stress-activated protein kinase signaling pathway                     | 1.60E-02 | 12           | 0            | 591       | 410       |
| GO:0016192~vesicle-mediated transport                                            | 1.60E-02 | 44           | 15           | 591       | 410       |
| GO:0042775~organelle ATP synthesis coupled electron transport                    | 1.76E-02 | 17           | 2            | 591       | 410       |
| GO:0042773~ATP synthesis coupled electron transport                              | 1.76E-02 | 17           | 2            | 591       | 410       |
| GO:0051649~establishment of cellular localization                                | 1.95E-02 | 63           | 26           | 591       | 410       |
| GO:0046530~photoreceptor cell differentiation                                    | 2.00E-02 | 19           | 3            | 591       | 410       |
| GO:0032501~multicellular organismal process                                      | 2.04E-02 | 151          | 80           | 591       | 410       |
| GO:0015672~monovalent inorganic cation transport                                 | 2.17E-02 | 21           | 4            | 591       | 410       |
| GO:0048468~cell development                                                      | 2.25E-02 | 76           | 34           | 591       | 410       |
| GO:0006811~ion transport                                                         | 2.34E-02 | 33           | 10           | 591       | 410       |
| GO:0006457~protein folding                                                       | 2.35E-02 | 25           | 6            | 591       | 410       |
| GO:0045165~cell fate commitment                                                  | 2.35E-02 | 25           | 6            | 591       | 410       |
| GO:0006139~nucleobase, nucleoside, nucleotide and nucleic acid metabolic process | 2.50E-02 | 126          | 65           | 591       | 410       |
| GO:0048856~anatomical structure development                                      | 2.50E-02 | 110          | 55           | 591       | 410       |
| GO:0022604~regulation of cell morphogenesis                                      | 2.52E-02 | 11           | 0            | 591       | 410       |
| GO:0022603~regulation of anatomical structure morphogenesis                      | 2.52E-02 | 11           | 0            | 591       | 410       |
| GO:0008360~regulation of cell shape                                              | 2.52E-02 | 11           | 0            | 591       | 410       |
| GO:0009607~response to biotic stimulus                                           | 2.85E-02 | 18           | 3            | 591       | 410       |
| GO:0001754~eye photoreceptor cell differentiation                                | 2.85E-02 | 18           | 3            | 591       | 410       |
| GO:0006952~defense response                                                      | 2.98E-02 | 34           | 11           | 591       | 410       |
| GO:0035220~wing disc development                                                 | 3.03E-02 | 20           | 4            | 591       | 410       |
| GO:0050794~regulation of cellular process                                        | 3.14E-02 | 94           | 46           | 591       | 410       |
| GO:0006812~cation transport                                                      | 3.17E-02 | 28           | 8            | 591       | 410       |
| GO:0043412~biopolymer modification                                               | 3.24E-02 | 79           | 37           | 591       | 410       |
| GO:0019953~sexual reproduction                                                   | 3.25E-02 | 50           | 20           | 591       | 410       |
| GO:0007276~gamete generation                                                     | 3.25E-02 | 50           | 20           | 591       | 410       |
| GO:0003006~reproductive developmental process                                    | 3.26E-02 | 13           | 1            | 591       | 410       |

|                                                                 |          |     |    |     |     |
|-----------------------------------------------------------------|----------|-----|----|-----|-----|
| GO:0046034~ATP metabolic process                                | 3.26E-02 | 13  | 1  | 591 | 410 |
| GO:0046907~intracellular transport                              | 3.95E-02 | 56  | 24 | 591 | 410 |
| GO:0016311~dephosphorylation                                    | 4.03E-02 | 17  | 3  | 591 | 410 |
| GO:0048731~system development                                   | 4.05E-02 | 94  | 47 | 591 | 410 |
| GO:0016310~phosphorylation                                      | 4.17E-02 | 54  | 23 | 591 | 410 |
| GO:0030707~ovarian follicle cell development                    | 4.20E-02 | 19  | 4  | 591 | 410 |
| GO:0006464~protein modification process                         | 4.54E-02 | 77  | 37 | 591 | 410 |
| GO:0043283~biopolymer metabolic process                         | 4.58E-02 | 162 | 91 | 591 | 410 |
| GO:0006754~ATP biosynthetic process                             | 4.86E-02 | 12  | 1  | 591 | 410 |
| GO:0006753~nucleoside phosphate metabolic process               | 4.86E-02 | 12  | 1  | 591 | 410 |
| GO:0015992~proton transport                                     | 4.86E-02 | 12  | 1  | 591 | 410 |
| GO:0042048~olfactory behavior                                   | 4.86E-02 | 12  | 1  | 591 | 410 |
| GO:0006399~tRNA metabolic process                               | 4.86E-02 | 12  | 1  | 591 | 410 |
| GO:0007635~chemosensory behavior                                | 4.86E-02 | 12  | 1  | 591 | 410 |
| GO:0006818~hydrogen transport                                   | 4.86E-02 | 12  | 1  | 591 | 410 |
| GO:0048513~organ development                                    | 5.11E-02 | 73  | 35 | 591 | 410 |
| GO:0016477~cell migration                                       | 5.44E-02 | 26  | 8  | 591 | 410 |
| GO:0048522~positive regulation of cellular process              | 5.75E-02 | 18  | 4  | 591 | 410 |
| GO:0007476~imaginal disc-derived wing morphogenesis             | 5.75E-02 | 18  | 4  | 591 | 410 |
| GO:0007472~wing disc morphogenesis                              | 5.75E-02 | 18  | 4  | 591 | 410 |
| GO:0000003~reproduction                                         | 5.76E-02 | 54  | 24 | 591 | 410 |
| GO:0048737~imaginal disc-derived appendage development          | 5.76E-02 | 20  | 5  | 591 | 410 |
| GO:0048736~appendage development                                | 5.76E-02 | 20  | 5  | 591 | 410 |
| GO:0035114~imaginal disc-derived appendage morphogenesis        | 5.76E-02 | 20  | 5  | 591 | 410 |
| GO:0035107~appendage morphogenesis                              | 5.76E-02 | 20  | 5  | 591 | 410 |
| GO:0043687~post-translational protein modification              | 5.80E-02 | 59  | 27 | 591 | 410 |
| GO:0002165~instar larval or pupal development                   | 6.09E-02 | 52  | 23 | 591 | 410 |
| GO:0009791~post-embryonic development                           | 6.09E-02 | 52  | 23 | 591 | 410 |
| GO:0006928~cell motility                                        | 6.22E-02 | 31  | 11 | 591 | 410 |
| GO:0051674~localization of cell                                 | 6.22E-02 | 31  | 11 | 591 | 410 |
| GO:0007242~intracellular signaling cascade                      | 6.67E-02 | 43  | 18 | 591 | 410 |
| GO:0010324~membrane invagination                                | 6.77E-02 | 27  | 9  | 591 | 410 |
| GO:0006897~endocytosis                                          | 6.77E-02 | 27  | 9  | 591 | 410 |
| GO:0015986~ATP synthesis coupled proton transport               | 7.16E-02 | 11  | 1  | 591 | 410 |
| GO:0006120~mitochondrial electron transport, NADH to ubiquinone | 7.16E-02 | 11  | 1  | 591 | 410 |
| GO:0007154~cell communication                                   | 7.34E-02 | 101 | 54 | 591 | 410 |
| GO:0016044~membrane organization and biogenesis                 | 7.45E-02 | 32  | 12 | 591 | 410 |
| GO:0051707~response to other organism                           | 7.80E-02 | 15  | 3  | 591 | 410 |
| GO:0051704~multi-organism process                               | 7.80E-02 | 15  | 3  | 591 | 410 |
| GO:0045045~secretory pathway                                    | 8.61E-02 | 26  | 9  | 591 | 410 |
| GO:0046903~secretion                                            | 8.61E-02 | 26  | 9  | 591 | 410 |
| GO:0032940~secretion by cell                                    | 8.61E-02 | 26  | 9  | 591 | 410 |
| GO:0002376~immune system process                                | 9.41E-02 | 22  | 7  | 591 | 410 |
| GO:0009617~response to bacterium                                | 9.48E-02 | 8   | 0  | 591 | 410 |
| GO:0042742~defense response to bacterium                        | 9.48E-02 | 8   | 0  | 591 | 410 |

Table S3. Gene Ontology terms with a directional bias toward nurses (N)&gt;foragers (F)

| Term                                                         | P Value  | Category F>N | Category N>F | Total F>N | Total N>F |
|--------------------------------------------------------------|----------|--------------|--------------|-----------|-----------|
| GO:0006412~translation                                       | 9.83E-11 | 33           | 79           | 588       | 413       |
| GO:0009059~macromolecule biosynthetic process                | 1.13E-08 | 46           | 85           | 588       | 413       |
| GO:0044249~cellular biosynthetic process                     | 1.42E-07 | 84           | 116          | 588       | 413       |
| GO:0009058~biosynthetic process                              | 1.23E-06 | 99           | 124          | 588       | 413       |
| GO:0010467~gene expression                                   | 1.32E-04 | 101          | 113          | 588       | 413       |
| GO:0006631~fatty acid metabolic process                      | 1.44E-04 | 4            | 20           | 588       | 413       |
| GO:0044260~cellular macromolecule metabolic process          | 1.47E-03 | 168          | 157          | 588       | 413       |
| GO:0044238~primary metabolic process                         | 3.82E-03 | 354          | 284          | 588       | 413       |
| GO:0044267~cellular protein metabolic process                | 6.51E-03 | 167          | 150          | 588       | 413       |
| GO:0006629~lipid metabolic process                           | 7.47E-03 | 31           | 41           | 588       | 413       |
| GO:0032787~monocarboxylic acid metabolic process             | 1.11E-02 | 12           | 22           | 588       | 413       |
| GO:0008152~metabolic process                                 | 1.14E-02 | 416          | 320          | 588       | 413       |
| GO:0044255~cellular lipid metabolic process                  | 1.31E-02 | 25           | 34           | 588       | 413       |
| GO:0019538~protein metabolic process                         | 2.38E-02 | 177          | 151          | 588       | 413       |
| GO:0009124~nucleoside monophosphate biosynthetic process     | 2.91E-02 | 1            | 8            | 588       | 413       |
| GO:0009123~nucleoside monophosphate metabolic process        | 2.91E-02 | 1            | 8            | 588       | 413       |
| GO:0006635~fatty acid beta-oxidation                         | 3.43E-02 | 2            | 9            | 588       | 413       |
| GO:0019395~fatty acid oxidation                              | 3.43E-02 | 2            | 9            | 588       | 413       |
| GO:0006044~N-acetylglucosamine metabolic process             | 3.80E-02 | 3            | 10           | 588       | 413       |
| GO:0006041~glucosamine metabolic process                     | 3.80E-02 | 3            | 10           | 588       | 413       |
| GO:0006040~amino sugar metabolic process                     | 3.80E-02 | 3            | 10           | 588       | 413       |
| GO:0006637~acyl-CoA metabolic process                        | 4.61E-02 | 0            | 6            | 588       | 413       |
| GO:0043170~macromolecule metabolic process                   | 4.82E-02 | 278          | 219          | 588       | 413       |
| GO:0009161~ribonucleoside monophosphate metabolic process    | 5.66E-02 | 1            | 7            | 588       | 413       |
| GO:0009156~ribonucleoside monophosphate biosynthetic process | 5.66E-02 | 1            | 7            | 588       | 413       |
| GO:0006030~chitin metabolic process                          | 5.66E-02 | 1            | 7            | 588       | 413       |
| GO:0044237~cellular metabolic process                        | 9.45E-02 | 373          | 280          | 588       | 413       |

Table S4. Quantitative proteomic analyses of protein abundance in the fat bodies of bees fed rich vs. poor diet

| Description                                                                                                                                                                                                                        | P-value  | logFC protein (F-N) | logFC RNA (F-N) |
|------------------------------------------------------------------------------------------------------------------------------------------------------------------------------------------------------------------------------------|----------|---------------------|-----------------|
| GB12681-RA [PREDICTED: Apis mellifera similar to Aldehyde dehydrogenase type III CG11140-PI, isoform I (LOC411822), mRNA]                                                                                                          | 1.29E-04 | -1.14               | -0.14           |
| GB14361-RA [PREDICTED: Apis mellifera similar to Larval serum protein 2 CG6806-PA (LOC551648), mRNA]                                                                                                                               | 5.64E-04 | -3.82               | -4.22           |
| GB18917-RA [PREDICTED: Apis mellifera similar to Cofilin/actin-depolymerizing factor homolog (Protein D61) (Protein twinstar) (LOC725718), mRNA]                                                                                   | 3.13E-03 | 0.36                | 0.34            |
| GB14791-RA [PREDICTED: Apis mellifera similar to bellwether CG3612-PA, transcript variant 1 (LOC409114), mRNA]                                                                                                                     | 6.54E-03 | 1.05                | 0.02            |
| GB12797-RA [PREDICTED: Apis mellifera similar to Trehalose-6-phosphate synthase 1 CG4104-PA (LOC408867), partial mRNA]                                                                                                             | 8.94E-03 | 1.23                | 0.61            |
| GB12855-RA [PREDICTED: Apis mellifera similar to Neural conserved at 73EF CG11661-PA, isoform A, transcript variant 1 (LOC408286), mRNA]                                                                                           | 9.10E-03 | 1.37                | 0.29            |
| GB13999-RA [Apis mellifera vitellogenin (Vg), mRNA]                                                                                                                                                                                | 1.50E-02 | -3.26               | -3.12           |
| GB16568-RA [PREDICTED: Apis mellifera similar to CG11015-PA (LOC552610), mRNA]                                                                                                                                                     | 1.58E-02 | 2.09                | 0.18            |
| GB12741-RA [PREDICTED: Apis mellifera similar to Aldehyde dehydrogenase CG3752-PA, transcript variant 1 (LOC550687), mRNA]                                                                                                         | 1.96E-02 | 0.57                | 0.36            |
| GB16903-RA [PREDICTED: Apis mellifera similar to cathD CG1548-PA (LOC409341), mRNA]                                                                                                                                                | 2.05E-02 | -0.89               | -0.80           |
| GB13073-RA [PREDICTED: Apis mellifera similar to CG5214-PA (LOC409155), mRNA]                                                                                                                                                      | 2.90E-02 | 1.14                | 0.14            |
| GB14852-RA [PREDICTED: Apis mellifera similar to heat shock protein 8, transcript variant 1 (LOC409418), mRNA]                                                                                                                     | 3.31E-02 | 0.25                | 0.09            |
| GB19166-RA [PREDICTED: Apis mellifera similar to Rab-protein 1 CG3320-PA, isoform A (LOC409456), mRNA]                                                                                                                             | 3.44E-02 | -0.74               | 0.10            |
| GB10973-RA [Apis mellifera arginine kinase (Argk), mRNA]                                                                                                                                                                           | 4.86E-02 | 1.00                | -0.07           |
| GB10695-RA [PREDICTED: Apis mellifera similar to Pyruvate kinase CG7070-PB, isoform B (LOC552007), mRNA]                                                                                                                           | 5.14E-02 | 0.99                | 0.26            |
| GB11059-RA [PREDICTED: Apis mellifera similar to Retinoid- and fatty-acid binding protein CG11064-PA, transcript variant 1 (LOC408961), mRNA]                                                                                      | 5.40E-02 | -1.35               | NA              |
| GB18969-RA [PREDICTED: Apis mellifera similar to 60 kDa heat shock protein, mitochondrial precursor (Hsp60) (60 kDa chaperonin) (CPN60) (Heat shock protein 60) (HSP-60) (Mitochondrial matrix protein P1) (LOC409384), mRNA]      | 5.63E-02 | -0.49               | -0.15           |
| GB15049-RB [PREDICTED: Apis mellifera similar to CG7470-PA (LOC412948), mRNA]                                                                                                                                                      | 5.94E-02 | 1.09                | 0.91            |
| GB13058-RA [PREDICTED: Apis mellifera similar to dihydroxyacetone kinase 2 (LOC413697), mRNA]                                                                                                                                      | 5.96E-02 | -1.24               | -1.70           |
| GB12488-RA [PREDICTED: Apis mellifera similar to Aconitase CG9244-PB (LOC408446), mRNA]                                                                                                                                            | 5.98E-02 | 1.23                | 0.27            |
| GB14517-RA [PREDICTED: Apis mellifera similar to Isocitrate dehydrogenase CG7176-PC, isoform C, transcript variant 2 (LOC551276), mRNA]                                                                                            | 6.23E-02 | -0.41               | -0.29           |
| GB13596-RA [PREDICTED: Apis mellifera similar to ATP synthase- CG11154-PA, isoform A (LOC551766), mRNA]                                                                                                                            | 6.34E-02 | 1.14                | 0.12            |
| GB20017-RA [PREDICTED: Apis mellifera similar to TER94 CG2331-PA, isoform A, transcript variant 1 (LOC409377), mRNA]                                                                                                               | 6.42E-02 | -0.20               | 0.04            |
| GB14284-RA [PREDICTED: Apis mellifera similar to Sorbitol dehydrogenase-2 CG4649-PA (LOC408871), mRNA]                                                                                                                             | 7.40E-02 | -0.66               | -0.93           |
| GB19171-RA [PREDICTED: Apis mellifera similar to Vacuolar H <sup>+</sup> -ATPase 55kD B subunit CG17369-PB, isoform B (LOC551721), mRNA]                                                                                           | 7.44E-02 | 0.77                | 0.41            |
| GB12113-RA [PREDICTED: Apis mellifera similar to porin CG6647-PA, isoform A (LOC551325), mRNA]                                                                                                                                     | 8.30E-02 | 1.89                | NA              |
| GB10477-RA [PREDICTED: Apis mellifera similar to B-cell receptor-associated protein 37 (LOC551944), mRNA]                                                                                                                          | 8.39E-02 | 0.55                | -0.38           |
| GB11385-RA [PREDICTED: Apis mellifera similar to CG3731-PB, isoform B (LOC410022), mRNA]                                                                                                                                           | 8.54E-02 | 1.86                | 0.29            |
| GB13368-RA [PREDICTED: Apis mellifera lambda crystallin-like protein, transcript variant 1 (Cry1), partial mRNA]                                                                                                                   | 8.56E-02 | 0.60                | 0.94            |
| GB14798-RA [PREDICTED: Apis mellifera similar to Glyceraldehyde 3 phosphate dehydrogenase 1 CG12055-PA, isoform A, transcript variant 2 (LOC410122), mRNA]                                                                         | 8.96E-02 | 0.48                | 0.17            |
| GB17663-RA [PREDICTED: Apis mellifera similar to CG5065-PA (LOC411910), mRNA]                                                                                                                                                      | 9.65E-02 | -2.80               | -0.86           |
| GB18004-RA [PREDICTED: Apis mellifera similar to CG31075-PA (LOC408559), mRNA]                                                                                                                                                     | 1.17E-01 | -1.41               | -1.44           |
| GB13508-RA [PREDICTED: Apis mellifera similar to ubiquinol-cytochrome c reductase, Rieske iron-sulfur polypeptide 1 (LOC411183), mRNA]                                                                                             | 1.18E-01 | 2.02                | 0.04            |
| GB19247-RA [PREDICTED: Apis mellifera similar to Elongation factor 2 (EF-2), transcript variant 1 (LOC409167), mRNA]                                                                                                               | 1.22E-01 | -0.53               | -0.08           |
| GB18737-RA [PREDICTED: Apis mellifera similar to 15-hydroxyprostaglandin dehydrogenase (LOC551423), mRNA]                                                                                                                          | 1.34E-01 | -2.19               | -1.71           |
| GB20117-RA [PREDICTED: Apis mellifera hypothetical LOC552391 (LOC552391), mRNA]                                                                                                                                                    | 1.41E-01 | -2.14               | -0.19           |
| GB15629-RA [PREDICTED: Apis mellifera similar to ATP synthase O subunit, mitochondrial precursor (Oligomycin sensitivity conferral protein) (OSCP) (LOC409236), mRNA]                                                              | 1.45E-01 | 0.89                | 0.02            |
| GB11503-RA [PREDICTED: Apis mellifera similar to CG5195-PA (LOC724779), mRNA]                                                                                                                                                      | 1.45E-01 | 0.50                | 1.33            |
| GB17626-RA [PREDICTED: Apis mellifera similar to CG7430-PA, transcript variant 1 (LOC551039), mRNA]                                                                                                                                | 1.49E-01 | 0.59                | 0.03            |
| GB14205-RA [PREDICTED: Apis mellifera similar to CG11267-PA (LOC552531), mRNA]                                                                                                                                                     | 1.64E-01 | 0.48                | 0.09            |
| GB10312-RA [PREDICTED: Apis mellifera similar to CG7461-PA (LOC412025), mRNA]                                                                                                                                                      | 1.67E-01 | -0.69               | -0.24           |
| GB16443-RA [PREDICTED: Apis mellifera similar to lethal (1) G0334 CG7010-PD, isoform D, transcript variant 1 (LOC551103), mRNA]                                                                                                    | 1.83E-01 | 0.84                | -0.09           |
| GB19860-RA [PREDICTED: Apis mellifera similar to Heat shock protein cognate 5 CG8542-PA (LOC408605), mRNA]                                                                                                                         | 1.92E-01 | 0.74                | 0.24            |
| GB18300-RA [PREDICTED: Apis mellifera similar to yellow-h CG1629-PA (LOC724293), mRNA]                                                                                                                                             | 1.93E-01 | 0.63                | 0.96            |
| GB12573-RA [PREDICTED: Apis mellifera similar to lethal (1) G0030 CG3861-PA, isoform A (LOC410059), mRNA]                                                                                                                          | 1.96E-01 | 1.17                | 0.36            |
| GB18162-RA [PREDICTED: Apis mellifera similar to Peroxisomal multifunctional enzyme type 2 (MFE-2) (D-bifunctional protein) (DBP) (17-beta-hydroxysteroid dehydrogenase 4) (17-beta-HSD 4) (LOC409986), mRNA]                      | 1.98E-01 | -0.44               | -0.19           |
| GB16448-RA [PREDICTED: Apis mellifera similar to Annexin-B9 (Annexin-9) (Annexin IX), transcript variant 1 (LOC409533), mRNA]                                                                                                      | 1.99E-01 | 0.59                | 0.76            |
| GB15716-RA [PREDICTED: Apis mellifera similar to CG5028-PA (LOC410396), mRNA]                                                                                                                                                      | 2.00E-01 | 1.88                | 0.11            |
| GB16526-RA [PREDICTED: Apis mellifera similar to Proteasome subunit alpha type 5 (Proteasome zeta chain) (Macropain zeta chain) (Multicatalytic endopeptidase complex zeta chain) (LOC551956), mRNA]                               | 2.02E-01 | -0.38               | -0.04           |
| GB13680-RA [PREDICTED: Apis mellifera similar to 3-hydroxyacyl-CoA dehydrogenase type-2 (3-hydroxyacyl-CoA dehydrogenase type II) (Type II HADH) (3-hydroxy-2-methylbutyryl-CoA dehydrogenase) (Scully protein) (LOC725274), mRNA] | 2.02E-01 | -1.89               | -0.85           |
| GB12526-RA [PREDICTED: Apis mellifera similar to lethal (2) k05713 CG8256-PC, isoform C (LOC551904), mRNA]                                                                                                                         | 2.09E-01 | 1.52                | 0.69            |
| GB16951-RA [PREDICTED: Apis mellifera similar to Malic enzyme CG10120-PB, isoform B, transcript variant 1                                                                                                                          | 2.11E-01 | -0.88               | -0.44           |

|                                                                                                                                                                                                                                                                  |          |       |       |  |
|------------------------------------------------------------------------------------------------------------------------------------------------------------------------------------------------------------------------------------------------------------------|----------|-------|-------|--|
| (LOC411813), partial mRNA]                                                                                                                                                                                                                                       |          |       |       |  |
| GB17876-RA [PREDICTED: Apis mellifera similar to Calcium-transporting ATPase sarcoplasmic/endoplasmic reticulum type (Calcium pump), transcript variant 1 (LOC410371), mRNA]                                                                                     | 2.43E-01 | 0.83  | 0.36  |  |
| GB15079-RA [PREDICTED: Apis mellifera similar to Glutamate dehydrogenase CG5320-PF, isoform F, transcript variant 1 (LOC409253), mRNA]                                                                                                                           | 2.50E-01 | 1.58  | -0.21 |  |
| GB12327-RA [PREDICTED: Apis mellifera similar to aldehyde dehydrogenase 1 family, member L2 (LOC551401), mRNA]                                                                                                                                                   | 2.53E-01 | 0.36  | 1.23  |  |
| GB18647-RA [PREDICTED: Apis mellifera similar to lethal (2) 37Cc CG10691-PA, isoform A (LOC408412), mRNA]                                                                                                                                                        | 2.54E-01 | 0.38  | -0.14 |  |
| GB10989-RA [PREDICTED: Apis mellifera similar to Vacuolar ATP synthase catalytic subunit A, osteoclast isoform (V-ATPase subunit A 2) (Vacuolar proton pump alpha subunit 2) (V-ATPase 69 kDa subunit 2) (Isoform HO68), transcript variant 1 (LOC551093), mRNA] | 2.54E-01 | 1.01  | 0.15  |  |
| GB19380-RA [PREDICTED: Apis mellifera similar to thioredoxin peroxidase 1 CG1633-PA, isoform A, transcript variant 1 (LOC409954), mRNA]                                                                                                                          | 2.71E-01 | 0.22  | 0.36  |  |
| GB14677-RA [PREDICTED: Apis mellifera similar to CG11089-PA (LOC412467), mRNA]                                                                                                                                                                                   | 2.79E-01 | -0.76 | -0.33 |  |
| GB17549-RA [PREDICTED: Apis mellifera similar to Putative Achaete Scute Target 1 CG6148-PB, isoform B (LOC413012), mRNA]                                                                                                                                         | 2.99E-01 | 0.66  | 0.04  |  |
| GB17255-RA [PREDICTED: Apis mellifera similar to lethal (1) G0230 CG2968-PA (LOC552682), mRNA]                                                                                                                                                                   | 3.34E-01 | 0.26  | 0.03  |  |
| GB11431-RA [PREDICTED: Apis mellifera similar to Nucleosome remodeling factor – 38kD CG4634-PA (LOC409774), mRNA]                                                                                                                                                | 3.36E-01 | 0.21  | 0.01  |  |
| GB14758-RA [PREDICTED: Apis mellifera similar to heat shock protein 90-alpha, transcript variant 1 (LOC408928), mRNA]                                                                                                                                            | 3.38E-01 | 0.39  | 0.17  |  |
| GB17223-RA [PREDICTED: Apis mellifera similar to CG5590-PA (LOC552717), mRNA]                                                                                                                                                                                    | 3.48E-01 | -0.84 | -0.16 |  |
| GB12338-RA [PREDICTED: Apis mellifera similar to 60S acidic ribosomal protein P0 (DNA-(apurinic or apyrimidinic site) lyase) (Apurinic-apyrimidinic endonuclease), transcript variant 1 (LOC550711), mRNA]                                                       | 3.57E-01 | -0.18 | -0.41 |  |
| GB14849-RA [PREDICTED: Apis mellifera similar to Putative deoxyribose-phosphate aldolase (Phosphodeoxyriboaldolase) (Deoxyriboaldolase) (DERA) (LOC551986), mRNA]                                                                                                | 3.60E-01 | -0.67 | -0.51 |  |
| GB15016-RA [PREDICTED: Apis mellifera similar to Heat shock protein cognate 3 CG4147-PA, isoform A (LOC409587), mRNA]                                                                                                                                            | 3.69E-01 | 0.20  | 0.41  |  |
| GB13160-RA [PREDICTED: Apis mellifera similar to pugilist CG4067-PA, isoform A, transcript variant 1 (LOC550749), mRNA]                                                                                                                                          | 3.85E-01 | 0.82  | 0.24  |  |
| GB13427-RA [PREDICTED: Apis mellifera similar to CG17337-PA, transcript variant 1 (LOC412393), mRNA]                                                                                                                                                             | 3.91E-01 | 0.55  | 0.55  |  |
| GB10514-RA [PREDICTED: Apis mellifera similar to Tubulin alpha-1 chain (LOC408388), mRNA]                                                                                                                                                                        | 3.92E-01 | 0.31  | 0.24  |  |
| GB15172-RA [PREDICTED: Apis mellifera similar to lethal (1) G0255 CG4094-PA, isoform A (LOC724321), mRNA]                                                                                                                                                        | 4.06E-01 | 0.22  | 0.06  |  |
| GB12364-RA [PREDICTED: Apis mellifera similar to fumarylacetoacetate hydrolase domain containing 2A, transcript variant 2 (LOC410635), mRNA]                                                                                                                     | 4.08E-01 | 1.09  | 0.17  |  |
| GB18557-RA [PREDICTED: Apis mellifera similar to Spectrin alpha chain (LOC551291), mRNA]                                                                                                                                                                         | 4.16E-01 | 0.58  | 0.20  |  |
| GB11665-RA [PREDICTED: Apis mellifera similar to Imaginal disc growth factor 4 CG1780-PA, isoform A (LOC413324), mRNA]                                                                                                                                           | 4.31E-01 | 0.83  | 0.91  |  |
| GB10133-RA [PREDICTED: Apis mellifera CuZn superoxide dismutase, transcript variant 1 (Sod1), mRNA]                                                                                                                                                              | 4.33E-01 | -0.19 | -0.10 |  |
| GB11973-RA [Apis mellifera cytochrome P450 monooxygenase (Cyp4g11), mRNA]                                                                                                                                                                                        | 4.37E-01 | -0.53 | -0.61 |  |
| GB10275-RA [PREDICTED: Apis mellifera similar to -Tubulin at 56D CG9277-PB, isoform B (LOC408782), mRNA]                                                                                                                                                         | 4.46E-01 | 0.10  | 0.38  |  |
| GB10238-RA [PREDICTED: Apis mellifera similar to ERp60 CG8983-PA, isoform A, transcript variant 2 (LOC409911), mRNA]                                                                                                                                             | 4.46E-01 | -0.30 | 0.17  |  |
| GB16485-RA [PREDICTED: Apis mellifera similar to ATP synthase D chain, mitochondrial (LOC410557), mRNA]                                                                                                                                                          | 4.50E-01 | 0.50  | 0.39  |  |
| GB18497-RA [PREDICTED: Apis mellifera similar to Elongation factor Tu mitochondrial CG6050-PA, transcript variant 2 (LOC408328), mRNA]                                                                                                                           | 4.65E-01 | 0.85  | -0.12 |  |
| GB10992-RA [PREDICTED: Apis mellifera similar to ATP citrate lyase CG8322-PA, isoform A, transcript variant 2 (LOC550686), mRNA]                                                                                                                                 | 4.80E-01 | -0.35 | -0.26 |  |
| GB15619-RA [PREDICTED: Apis mellifera similar to CG8036-PB, isoform B, transcript variant 1 (LOC550804), mRNA]                                                                                                                                                   | 4.93E-01 | 0.72  | 0.28  |  |
| GB15039-RA [PREDICTED: Apis mellifera similar to Enolase CG17654-PA, isoform A (LOC552678), partial mRNA]                                                                                                                                                        | 5.05E-01 | 0.31  | 0.10  |  |
| GB19460-RA [PREDICTED: Apis mellifera similar to Aldolase CG6058-PF, isoform F (LOC550785), mRNA]                                                                                                                                                                | 5.07E-01 | 0.36  | -0.45 |  |
| GB12951-RA [PREDICTED: Apis mellifera similar to 14-3-3 CG17870-PC, isoform C, transcript variant 1 (LOC408289), mRNA]                                                                                                                                           | 5.10E-01 | -0.32 | 0.22  |  |
| GB12951-RA [PREDICTED: Apis mellifera similar to 14-3-3 CG17870-PC, isoform C, transcript variant 1 (LOC408289), mRNA]                                                                                                                                           | 5.10E-01 | -0.32 | 0.22  |  |
| GB12951-RA [PREDICTED: Apis mellifera similar to 14-3-3 CG17870-PC, isoform C, transcript variant 1 (LOC408289), mRNA]                                                                                                                                           | 5.10E-01 | -0.32 | 0.22  |  |
| GB18760-RA [PREDICTED: Apis mellifera similar to L-xylulose reductase (XR) (Dicarbonyl/L-xylulose reductase) (LOC413567), mRNA]                                                                                                                                  | 5.44E-01 | 0.98  | -0.68 |  |
| GB11461-RA [PREDICTED: Apis mellifera similar to UGP CG4347-PA, isoform A, transcript variant 1 (LOC412069), mRNA]                                                                                                                                               | 6.19E-01 | 0.19  | 0.58  |  |
| GB13967-RA [Apis mellifera venom protein 2 (LOC503505), mRNA]                                                                                                                                                                                                    | 6.31E-01 | -0.32 | -0.28 |  |
| GB17681-RA [PREDICTED: Apis mellifera actin, transcript variant 2 (LOC406122), mRNA]                                                                                                                                                                             | 6.61E-01 | 0.14  | 0.28  |  |
| GB18719-RA [PREDICTED: Apis mellifera similar to R04B5.5 (LOC410167), mRNA]                                                                                                                                                                                      | 6.69E-01 | -0.14 | -0.04 |  |
| GB18727-RA [PREDICTED: Apis mellifera similar to CG5362-PA, transcript variant 1 (LOC411014), mRNA]                                                                                                                                                              | 7.20E-01 | -0.15 | -0.11 |  |
| GB13045-RA [PREDICTED: Apis mellifera similar to CG4685-PA, isoform A (LOC412305), mRNA]                                                                                                                                                                         | 7.25E-01 | 0.13  | -0.17 |  |
| GB12182-RA [PREDICTED: Apis mellifera similar to Thiolase CG4581-PA (LOC551775), mRNA]                                                                                                                                                                           | 7.47E-01 | 0.08  | -0.47 |  |
| GB10498-RA [PREDICTED: Apis mellifera similar to Peroxiredoxin 2540 CG11765-PA (LOC551975), mRNA]                                                                                                                                                                | 7.62E-01 | 0.11  | -0.28 |  |
| GB18498-RA [PREDICTED: Apis mellifera enoyl Coenzyme A hydratase, short chain, 1, mitochondrial (Echs1), mRNA]                                                                                                                                                   | 7.92E-01 | -0.12 | -0.72 |  |
| GB16132-RA [PREDICTED: Apis mellifera similar to CG7834-PA, isoform A (LOC410308), mRNA]                                                                                                                                                                         | 7.99E-01 | -0.03 | -0.47 |  |
| GB16464-RA [PREDICTED: Apis mellifera similar to mitochondrial malate dehydrogenase precursor, transcript variant 1 (LOC408950), mRNA]                                                                                                                           | 8.15E-01 | 0.05  | NA    |  |
| GB19745-RA [Apis mellifera transferrin (Trf), mRNA]                                                                                                                                                                                                              | 8.22E-01 | -0.13 | -1.00 |  |
| GB16882-RA [PREDICTED: Apis mellifera similar to walrus CG8996-PB, isoform B, transcript variant 1 (LOC551710), mRNA]                                                                                                                                            | 8.65E-01 | 0.12  | -0.82 |  |
| GB17499-RA [Apis mellifera ADP/ATP translocase (Ant), mRNA]                                                                                                                                                                                                      | 8.93E-01 | -0.10 | 0.14  |  |
| GB15662-RA [PREDICTED: Apis mellifera similar to CG10962-PB, isoform B (LOC724721), mRNA]                                                                                                                                                                        | 9.17E-01 | -0.06 | 0.37  |  |

|                                                                                                                                                                         |          |       |       |
|-------------------------------------------------------------------------------------------------------------------------------------------------------------------------|----------|-------|-------|
| GB19030-RA [PREDICTED: Apis mellifera similar to CG10638-PA, isoform A, transcript variant 1 (LOC552018), mRNA]                                                         | 9.46E-01 | -0.02 | 0.69  |
| GB12956-RA [PREDICTED: Apis mellifera similar to yippee interacting protein 2 CG4600-PA (LOC408291), mRNA]                                                              | 9.64E-01 | 0.03  | -0.81 |
| GB15718-RA [PREDICTED: Apis mellifera similar to CG14207-PB, isoform B, transcript variant 1 (LOC408875), mRNA]                                                         | 9.72E-01 | 0.02  | 0.10  |
| GB16864-RA [PREDICTED: Apis mellifera similar to CG4389-PA, isoform A (LOC410325), mRNA]                                                                                | 9.79E-01 | -0.01 | -0.23 |
| GB10411-RA [PREDICTED: Apis mellifera similar to Proteasome subunit alpha type 7-1 (Proteasome 28 kDa subunit 1) (PROS-Dm28.1), transcript variant 1 (LOC410095), mRNA] | 1.00E+00 | 0.00  | 0.18  |

Table S5. Gene Ontology with a directional bias toward poor diet (P)&gt;rich diet (R)

| Term                                                                                           | P Value  | Category P>R | Category R>P | Total P>R | Total R>P |
|------------------------------------------------------------------------------------------------|----------|--------------|--------------|-----------|-----------|
| GO:0050794~regulation of cellular process                                                      | 3.82E-12 | 126          | 61           | 511       | 653       |
| GO:0009653~anatomical structure morphogenesis                                                  | 3.87E-12 | 112          | 49           | 511       | 653       |
| GO:0050789~regulation of biological process                                                    | 5.08E-11 | 150          | 88           | 511       | 653       |
| GO:0032502~developmental process                                                               | 7.05E-11 | 182          | 121          | 511       | 653       |
| GO:0048856~anatomical structure development                                                    | 7.53E-11 | 144          | 83           | 511       | 653       |
| GO:0048731~system development                                                                  | 5.41E-10 | 124          | 68           | 511       | 653       |
| GO:0007275~multicellular organismal development                                                | 1.30E-09 | 158          | 103          | 511       | 653       |
| GO:0048869~cellular developmental process                                                      | 2.76E-09 | 113          | 61           | 511       | 653       |
| GO:0032501~multicellular organismal process                                                    | 4.58E-09 | 178          | 127          | 511       | 653       |
| GO:0065007~biological regulation                                                               | 6.17E-09 | 165          | 114          | 511       | 653       |
| GO:0030154~cell differentiation                                                                | 7.11E-09 | 111          | 61           | 511       | 653       |
| GO:0000902~cell morphogenesis                                                                  | 9.09E-09 | 68           | 25           | 511       | 653       |
| GO:0032989~cellular structure morphogenesis                                                    | 9.09E-09 | 68           | 25           | 511       | 653       |
| GO:0048513~organ development                                                                   | 9.80E-09 | 97           | 49           | 511       | 653       |
| GO:0031323~regulation of cellular metabolic process                                            | 2.68E-08 | 81           | 37           | 511       | 653       |
| GO:0019222~regulation of metabolic process                                                     | 3.85E-08 | 85           | 41           | 511       | 653       |
| GO:0006350~transcription                                                                       | 4.03E-08 | 79           | 36           | 511       | 653       |
| GO:0019219~regulation of nucleobase, nucleoside, nucleotide and nucleic acid metabolic process | 5.45E-08 | 76           | 34           | 511       | 653       |
| GO:0007444~imaginal disc development                                                           | 5.92E-08 | 51           | 15           | 511       | 653       |
| GO:0007154~cell communication                                                                  | 6.26E-08 | 125          | 79           | 511       | 653       |
| GO:0007165~signal transduction                                                                 | 1.20E-07 | 109          | 65           | 511       | 653       |
| GO:0010468~regulation of gene expression                                                       | 1.50E-07 | 74           | 34           | 511       | 653       |
| GO:0010467~gene expression                                                                     | 1.53E-07 | 156          | 113          | 511       | 653       |
| GO:0045449~regulation of transcription                                                         | 3.56E-07 | 65           | 28           | 511       | 653       |
| GO:0043283~biopolymer metabolic process                                                        | 8.39E-07 | 186          | 151          | 511       | 653       |
| GO:0007560~imaginal disc morphogenesis                                                         | 9.47E-07 | 42           | 12           | 511       | 653       |
| GO:0009887~organ morphogenesis                                                                 | 9.51E-07 | 49           | 17           | 511       | 653       |
| GO:0006351~transcription, DNA-dependent                                                        | 2.32E-06 | 66           | 32           | 511       | 653       |
| GO:0032774~RNA biosynthetic process                                                            | 2.32E-06 | 66           | 32           | 511       | 653       |
| GO:0002117~larval development (sensu Amphibia)                                                 | 2.76E-06 | 43           | 14           | 511       | 653       |
| GO:0007552~metamorphosis                                                                       | 2.76E-06 | 43           | 14           | 511       | 653       |
| GO:0006355~regulation of transcription, DNA-dependent                                          | 2.80E-06 | 56           | 24           | 511       | 653       |
| GO:0048468~cell development                                                                    | 5.85E-06 | 85           | 51           | 511       | 653       |
| GO:0016070~RNA metabolic process                                                               | 7.20E-06 | 100          | 66           | 511       | 653       |
| GO:0007242~intracellular signaling cascade                                                     | 1.36E-05 | 54           | 25           | 511       | 653       |
| GO:0007399~nervous system development                                                          | 3.56E-05 | 60           | 32           | 511       | 653       |
| GO:0016043~cellular component organization and biogenesis                                      | 6.58E-05 | 173          | 152          | 511       | 653       |
| GO:0007423~sensory organ development                                                           | 7.21E-05 | 37           | 14           | 511       | 653       |
| GO:0048523~negative regulation of cellular process                                             | 1.07E-04 | 40           | 17           | 511       | 653       |
| GO:0051301~cell division                                                                       | 1.62E-04 | 26           | 7            | 511       | 653       |
| GO:0009790~embryonic development                                                               | 1.85E-04 | 46           | 23           | 511       | 653       |
| GO:0048519~negative regulation of biological process                                           | 1.94E-04 | 40           | 18           | 511       | 653       |
| GO:0001654~eye development                                                                     | 2.15E-04 | 31           | 11           | 511       | 653       |
| GO:0000003~reproduction                                                                        | 2.46E-04 | 51           | 28           | 511       | 653       |
| GO:0007010~cytoskeleton organization and biogenesis                                            | 2.57E-04 | 52           | 29           | 511       | 653       |
| GO:0048736~appendage development                                                               | 2.89E-04 | 25           | 7            | 511       | 653       |
| GO:0006357~regulation of transcription from RNA polymerase II promoter                         | 2.90E-04 | 33           | 13           | 511       | 653       |
| GO:0048749~compound eye development                                                            | 3.08E-04 | 29           | 10           | 511       | 653       |
| GO:0007276~gamete generation                                                                   | 3.23E-04 | 47           | 25           | 511       | 653       |
| GO:0019953~sexual reproduction                                                                 | 3.23E-04 | 47           | 25           | 511       | 653       |
| GO:0022008~neurogenesis                                                                        | 3.37E-04 | 40           | 19           | 511       | 653       |
| GO:0035107~appendage morphogenesis                                                             | 5.10E-04 | 24           | 7            | 511       | 653       |
| GO:0007292~female gamete generation                                                            | 5.30E-04 | 39           | 19           | 511       | 653       |
| GO:0048477~oogenesis                                                                           | 5.30E-04 | 39           | 19           | 511       | 653       |
| GO:0048699~generation of neurons                                                               | 5.30E-04 | 39           | 19           | 511       | 653       |
| GO:0002165~instar larval or pupal development                                                  | 5.95E-04 | 51           | 30           | 511       | 653       |
| GO:0006366~transcription from RNA polymerase II promoter                                       | 6.42E-04 | 42           | 22           | 511       | 653       |
| GO:0002164~larval development                                                                  | 6.77E-04 | 43           | 23           | 511       | 653       |
| GO:0007476~imaginal disc-derived wing morphogenesis                                            | 7.15E-04 | 22           | 6            | 511       | 653       |
| GO:0007472~wing disc morphogenesis                                                             | 7.15E-04 | 22           | 6            | 511       | 653       |
| GO:0035214~eye-antennal disc development                                                       | 7.50E-04 | 26           | 9            | 511       | 653       |
| GO:0000904~cellular morphogenesis during differentiation                                       | 8.25E-04 | 38           | 19           | 511       | 653       |
| GO:0048737~imaginal disc-derived appendage development                                         | 8.91E-04 | 23           | 7            | 511       | 653       |
| GO:0030030~cell projection organization and biogenesis                                         | 1.20E-03 | 36           | 18           | 511       | 653       |
| GO:0032990~cell part morphogenesis                                                             | 1.20E-03 | 36           | 18           | 511       | 653       |
| GO:0048858~cell projection morphogenesis                                                       | 1.20E-03 | 36           | 18           | 511       | 653       |
| GO:0006996~organelle organization and biogenesis                                               | 1.21E-03 | 84           | 65           | 511       | 653       |
| GO:0048592~eye morphogenesis                                                                   | 1.26E-03 | 25           | 9            | 511       | 653       |



|                                                                                                         |          |     |     |     |     |
|---------------------------------------------------------------------------------------------------------|----------|-----|-----|-----|-----|
| GO:0007455-eye-antennal disc morphogenesis                                                              | 1.26E-03 | 25  | 9   | 511 | 653 |
| GO:0043170-macromolecule metabolic process                                                              | 1.45E-03 | 276 | 293 | 511 | 653 |
| GO:0035220-wing disc development                                                                        | 1.54E-03 | 22  | 7   | 511 | 653 |
| GO:0035114-imaginal disc-derived appendage morphogenesis                                                | 1.54E-03 | 22  | 7   | 511 | 653 |
| GO:0048812-neurite morphogenesis                                                                        | 1.62E-03 | 33  | 16  | 511 | 653 |
| GO:0048667-neuron morphogenesis during differentiation                                                  | 1.62E-03 | 33  | 16  | 511 | 653 |
| GO:0031175-neurite development                                                                          | 1.62E-03 | 33  | 16  | 511 | 653 |
| GO:0045165-cell fate commitment                                                                         | 1.64E-03 | 27  | 11  | 511 | 653 |
| GO:0009791-post-embryonic development                                                                   | 1.94E-03 | 51  | 33  | 511 | 653 |
| GO:0007166-cell surface receptor linked signal transduction                                             | 1.96E-03 | 52  | 34  | 511 | 653 |
| GO:0007049-cell cycle                                                                                   | 2.13E-03 | 38  | 21  | 511 | 653 |
| GO:0030036-actin cytoskeleton organization and biogenesis                                               | 2.39E-03 | 25  | 10  | 511 | 653 |
| GO:0030029-actin filament-based process                                                                 | 2.39E-03 | 25  | 10  | 511 | 653 |
| GO:0008283-cell proliferation                                                                           | 2.39E-03 | 25  | 10  | 511 | 653 |
| GO:0048518-positive regulation of biological process                                                    | 2.63E-03 | 21  | 7   | 511 | 653 |
| GO:0048666-neuron development                                                                           | 2.66E-03 | 33  | 17  | 511 | 653 |
| GO:0030182-neuron differentiation                                                                       | 2.80E-03 | 34  | 18  | 511 | 653 |
| GO:0022402-cell cycle process                                                                           | 2.94E-03 | 35  | 19  | 511 | 653 |
| GO:0001745-compound eye morphogenesis                                                                   | 3.05E-03 | 22  | 8   | 511 | 653 |
| GO:0007169-transmembrane receptor protein tyrosine kinase signaling pathway                             | 3.06E-03 | 12  | 1   | 511 | 653 |
| GO:0006928-cell motility                                                                                | 3.64E-03 | 30  | 15  | 511 | 653 |
| GO:0006259-DNA metabolic process                                                                        | 4.39E-03 | 34  | 19  | 511 | 653 |
| GO:0050793-regulation of developmental process                                                          | 4.61E-03 | 26  | 12  | 511 | 653 |
| GO:0016477-cell migration                                                                               | 4.95E-03 | 27  | 13  | 511 | 653 |
| GO:0007409-axonogenesis                                                                                 | 5.04E-03 | 21  | 8   | 511 | 653 |
| GO:0007369-gastrulation                                                                                 | 6.03E-03 | 11  | 1   | 511 | 653 |
| GO:0007350-blastoderm segmentation                                                                      | 6.03E-03 | 11  | 1   | 511 | 653 |
| GO:0051674-localization of cell                                                                         | 6.08E-03 | 31  | 17  | 511 | 653 |
| GO:0009888-tissue development                                                                           | 7.19E-03 | 25  | 12  | 511 | 653 |
| GO:0003006-reproductive developmental process                                                           | 7.28E-03 | 9   | 0   | 511 | 653 |
| GO:0007163-establishment and/or maintenance of cell polarity                                            | 7.81E-03 | 15  | 4   | 511 | 653 |
| GO:0043687-post-translational protein modification                                                      | 8.97E-03 | 60  | 47  | 511 | 653 |
| GO:0007243-protein kinase cascade                                                                       | 9.32E-03 | 16  | 5   | 511 | 653 |
| GO:0022403-cell cycle phase                                                                             | 9.77E-03 | 22  | 10  | 511 | 653 |
| GO:0000278-mitotic cell cycle                                                                           | 9.77E-03 | 22  | 10  | 511 | 653 |
| GO:0051276-chromosome organization and biogenesis                                                       | 1.04E-02 | 23  | 11  | 511 | 653 |
| GO:0003008-system process                                                                               | 1.05E-02 | 41  | 28  | 511 | 653 |
| GO:0007411-axon guidance                                                                                | 1.07E-02 | 17  | 6   | 511 | 653 |
| GO:0008356-asymmetric cell division                                                                     | 1.17E-02 | 10  | 1   | 511 | 653 |
| GO:0051248-negative regulation of protein metabolic process                                             | 1.17E-02 | 10  | 1   | 511 | 653 |
| GO:0051246-regulation of protein metabolic process                                                      | 1.20E-02 | 18  | 7   | 511 | 653 |
| GO:0006139-nucleobase, nucleoside, nucleotide and nucleic acid metabolic process                        | 1.27E-02 | 139 | 138 | 511 | 653 |
| GO:0040007-growth                                                                                       | 1.42E-02 | 20  | 9   | 511 | 653 |
| GO:0001703-gastrulation with mouth forming first                                                        | 1.50E-02 | 8   | 0   | 511 | 653 |
| GO:0010004-gastrulation involving germ band extension                                                   | 1.50E-02 | 8   | 0   | 511 | 653 |
| GO:0048754-branching morphogenesis of a tube                                                            | 1.50E-02 | 8   | 0   | 511 | 653 |
| GO:0001763-morphogenesis of a branching structure                                                       | 1.50E-02 | 8   | 0   | 511 | 653 |
| GO:0045935-positive regulation of nucleobase, nucleoside, nucleotide and nucleic acid metabolic process | 1.59E-02 | 11  | 2   | 511 | 653 |
| GO:0016071-mRNA metabolic process                                                                       | 1.88E-02 | 27  | 16  | 511 | 653 |
| GO:0048522-positive regulation of cellular process                                                      | 1.93E-02 | 17  | 7   | 511 | 653 |
| GO:0007067-mitosis                                                                                      | 1.93E-02 | 17  | 7   | 511 | 653 |
| GO:0000087-M phase of mitotic cell cycle                                                                | 1.93E-02 | 17  | 7   | 511 | 653 |
| GO:0009408-response to heat                                                                             | 1.97E-02 | 12  | 3   | 511 | 653 |
| GO:0035282-segmentation                                                                                 | 1.97E-02 | 12  | 3   | 511 | 653 |
| GO:0031325-positive regulation of cellular metabolic process                                            | 1.97E-02 | 12  | 3   | 511 | 653 |
| GO:0009893-positive regulation of metabolic process                                                     | 1.97E-02 | 12  | 3   | 511 | 653 |
| GO:0001738-morphogenesis of a polarized epithelium                                                      | 1.97E-02 | 12  | 3   | 511 | 653 |
| GO:0046530-photoreceptor cell differentiation                                                           | 2.08E-02 | 18  | 8   | 511 | 653 |
| GO:0043412-biopolymer modification                                                                      | 2.11E-02 | 75  | 67  | 511 | 653 |
| GO:0009966-regulation of signal transduction                                                            | 2.21E-02 | 19  | 9   | 511 | 653 |
| GO:0003012-muscle system process                                                                        | 2.24E-02 | 9   | 1   | 511 | 653 |
| GO:0006936-muscle contraction                                                                           | 2.24E-02 | 9   | 1   | 511 | 653 |
| GO:0009266-response to temperature stimulus                                                             | 2.31E-02 | 13  | 4   | 511 | 653 |
| GO:0000226-microtubule cytoskeleton organization and biogenesis                                         | 2.31E-02 | 13  | 4   | 511 | 653 |
| GO:0048646-anatomical structure formation                                                               | 2.42E-02 | 21  | 11  | 511 | 653 |
| GO:0045941-positive regulation of transcription                                                         | 2.88E-02 | 10  | 2   | 511 | 653 |
| GO:0048589-developmental growth                                                                         | 2.88E-02 | 10  | 2   | 511 | 653 |
| GO:0016055-Wnt receptor signaling pathway                                                               | 2.88E-02 | 10  | 2   | 511 | 653 |
| GO:0040008-regulation of growth                                                                         | 2.88E-02 | 10  | 2   | 511 | 653 |

|                                                                       |          |     |     |     |     |
|-----------------------------------------------------------------------|----------|-----|-----|-----|-----|
| GO:0007446~imaginal disc growth                                       | 3.05E-02 | 7   | 0   | 511 | 653 |
| GO:0016570~histone modification                                       | 3.05E-02 | 7   | 0   | 511 | 653 |
| GO:0016569~covalent chromatin modification                            | 3.05E-02 | 7   | 0   | 511 | 653 |
| GO:0001754~eye photoreceptor cell differentiation                     | 3.06E-02 | 16  | 7   | 511 | 653 |
| GO:0001751~compound eye photoreceptor cell differentiation            | 3.06E-02 | 16  | 7   | 511 | 653 |
| GO:0006325~establishment and/or maintenance of chromatin architecture | 3.23E-02 | 17  | 8   | 511 | 653 |
| GO:0006323~DNA packaging                                              | 3.23E-02 | 17  | 8   | 511 | 653 |
| GO:0007264~small GTPase mediated signal transduction                  | 3.23E-02 | 17  | 8   | 511 | 653 |
| GO:0022414~reproductive process                                       | 3.42E-02 | 11  | 3   | 511 | 653 |
| GO:0007164~establishment of tissue polarity                           | 3.42E-02 | 11  | 3   | 511 | 653 |
| GO:0001736~establishment of planar polarity                           | 3.42E-02 | 11  | 3   | 511 | 653 |
| GO:0048598~embryonic morphogenesis                                    | 3.51E-02 | 19  | 10  | 511 | 653 |
| GO:0009607~response to biotic stimulus                                | 3.51E-02 | 19  | 10  | 511 | 653 |
| GO:0000279~M phase                                                    | 3.51E-02 | 19  | 10  | 511 | 653 |
| GO:0009628~response to abiotic stimulus                               | 3.61E-02 | 20  | 11  | 511 | 653 |
| GO:0006397~mRNA processing                                            | 3.83E-02 | 24  | 15  | 511 | 653 |
| GO:0000165~MAPKKK cascade                                             | 4.22E-02 | 13  | 5   | 511 | 653 |
| GO:0051726~regulation of cell cycle                                   | 4.51E-02 | 14  | 6   | 511 | 653 |
| GO:0000074~regulation of progression through cell cycle               | 4.51E-02 | 14  | 6   | 511 | 653 |
| GO:0009987~cellular process                                           | 4.61E-02 | 452 | 554 | 511 | 653 |
| GO:0007167~enzyme linked receptor protein signaling pathway           | 4.74E-02 | 15  | 7   | 511 | 653 |
| GO:0007517~muscle development                                         | 5.08E-02 | 17  | 9   | 511 | 653 |
| GO:0051049~regulation of transport                                    | 5.10E-02 | 9   | 2   | 511 | 653 |
| GO:0006396~RNA processing                                             | 5.26E-02 | 28  | 20  | 511 | 653 |
| GO:0001700~embryonic development via the syncytial blastoderm         | 5.37E-02 | 21  | 13  | 511 | 653 |
| GO:0007610~behavior                                                   | 5.37E-02 | 21  | 13  | 511 | 653 |
| GO:0050896~response to stimulus                                       | 5.61E-02 | 73  | 70  | 511 | 653 |
| GO:0008361~regulation of cell size                                    | 5.78E-02 | 10  | 3   | 511 | 653 |
| GO:0000910~cytokinesis                                                | 5.78E-02 | 10  | 3   | 511 | 653 |
| GO:0051252~regulation of RNA metabolic process                        | 5.78E-02 | 10  | 3   | 511 | 653 |
| GO:0006464~protein modification process                               | 6.05E-02 | 70  | 67  | 511 | 653 |
| GO:0050877~neurological system process                                | 6.23E-02 | 35  | 28  | 511 | 653 |
| GO:0016568~chromatin modification                                     | 6.30E-02 | 11  | 4   | 511 | 653 |
| GO:0007398~ectoderm development                                       | 6.99E-02 | 13  | 6   | 511 | 653 |
| GO:0042221~response to chemical stimulus                              | 7.19E-02 | 26  | 19  | 511 | 653 |
| GO:0035239~tube morphogenesis                                         | 7.21E-02 | 14  | 7   | 511 | 653 |
| GO:0007498~mesoderm development                                       | 7.21E-02 | 14  | 7   | 511 | 653 |
| GO:0006468~protein amino acid phosphorylation                         | 7.27E-02 | 25  | 18  | 511 | 653 |
| GO:0030707~ovarian follicle cell development                          | 7.37E-02 | 15  | 8   | 511 | 653 |
| GO:0009792~embryonic development ending in birth or egg hatching      | 7.54E-02 | 21  | 14  | 511 | 653 |
| GO:0042127~regulation of cell proliferation                           | 7.71E-02 | 7   | 1   | 511 | 653 |
| GO:0009968~negative regulation of signal transduction                 | 8.79E-02 | 8   | 2   | 511 | 653 |
| GO:0007267~cell-cell signaling                                        | 9.26E-02 | 27  | 21  | 511 | 653 |
| GO:0003002~regionalization                                            | 9.43E-02 | 26  | 20  | 511 | 653 |
| GO:0007389~pattern specification process                              | 9.43E-02 | 26  | 20  | 511 | 653 |
| GO:0007265~Ras protein signal transduction                            | 9.53E-02 | 9   | 3   | 511 | 653 |
| GO:0019226~transmission of nerve impulse                              | 9.59E-02 | 25  | 19  | 511 | 653 |

Table S6. Gene Ontology terms with a directional bias toward rich diet (R)&gt;poor diet (P)

| Term                                                               | P Value  | Category P>R | Category R>P | Total P>R | Total R>P |
|--------------------------------------------------------------------|----------|--------------|--------------|-----------|-----------|
| GO:0019752~carboxylic acid metabolic process                       | 5.12E-11 | 14           | 89           | 506       | 658       |
| GO:0006082~organic acid metabolic process                          | 5.12E-11 | 14           | 89           | 506       | 658       |
| GO:0055086~nucleobase, nucleoside and nucleotide metabolic process | 3.41E-09 | 2            | 47           | 506       | 658       |
| GO:0009117~nucleotide metabolic process                            | 1.42E-07 | 2            | 40           | 506       | 658       |
| GO:0009058~biosynthetic process                                    | 2.79E-07 | 67           | 167          | 506       | 658       |
| GO:0006725~aromatic compound metabolic process                     | 3.33E-07 | 1            | 35           | 506       | 658       |
| GO:0006807~nitrogen compound metabolic process                     | 6.28E-07 | 16           | 72           | 506       | 658       |
| GO:0006520~amino acid metabolic process                            | 7.92E-07 | 10           | 58           | 506       | 658       |
| GO:0009165~nucleotide biosynthetic process                         | 9.74E-07 | 1            | 33           | 506       | 658       |
| GO:0006119~oxidative phosphorylation                               | 9.74E-07 | 1            | 33           | 506       | 658       |
| GO:0051186~cofactor metabolic process                              | 9.82E-07 | 5            | 45           | 506       | 658       |
| GO:0009259~ribonucleotide metabolic process                        | 1.16E-06 | 0            | 29           | 506       | 658       |
| GO:0006519~amino acid and derivative metabolic process             | 1.56E-06 | 12           | 61           | 506       | 658       |
| GO:0009260~ribonucleotide biosynthetic process                     | 2.02E-06 | 0            | 28           | 506       | 658       |
| GO:0009308~amine metabolic process                                 | 2.05E-06 | 16           | 69           | 506       | 658       |
| GO:0006732~coenzyme metabolic process                              | 2.52E-06 | 5            | 43           | 506       | 658       |
| GO:0006163~purine nucleotide metabolic process                     | 3.52E-06 | 0            | 27           | 506       | 658       |
| GO:0006164~purine nucleotide biosynthetic process                  | 6.11E-06 | 0            | 26           | 506       | 658       |
| GO:0009150~purine ribonucleotide metabolic process                 | 6.11E-06 | 0            | 26           | 506       | 658       |
| GO:0006091~generation of precursor metabolites and energy          | 9.72E-06 | 19           | 71           | 506       | 658       |
| GO:0009152~purine ribonucleotide biosynthetic process              | 1.06E-05 | 0            | 25           | 506       | 658       |
| GO:0008152~metabolic process                                       | 1.46E-05 | 334          | 509          | 506       | 658       |
| GO:0044249~cellular biosynthetic process                           | 2.51E-05 | 62           | 143          | 506       | 658       |
| GO:0006629~lipid metabolic process                                 | 4.10E-05 | 15           | 59           | 506       | 658       |
| GO:0032787~monocarboxylic acid metabolic process                   | 5.72E-05 | 3            | 31           | 506       | 658       |
| GO:0006631~fatty acid metabolic process                            | 1.04E-04 | 2            | 27           | 506       | 658       |
| GO:0046483~heterocycle metabolic process                           | 1.78E-04 | 1            | 23           | 506       | 658       |
| GO:0009112~nucleobase metabolic process                            | 2.73E-04 | 0            | 19           | 506       | 658       |
| GO:0006118~electron transport                                      | 3.44E-04 | 14           | 51           | 506       | 658       |
| GO:0051188~cofactor biosynthetic process                           | 4.84E-04 | 1            | 21           | 506       | 658       |
| GO:0009108~coenzyme biosynthetic process                           | 4.84E-04 | 1            | 21           | 506       | 658       |
| GO:0009205~purine ribonucleoside triphosphate metabolic process    | 7.90E-04 | 0            | 17           | 506       | 658       |
| GO:0009199~ribonucleoside triphosphate metabolic process           | 7.90E-04 | 0            | 17           | 506       | 658       |
| GO:0009144~purine nucleoside triphosphate metabolic process        | 7.90E-04 | 0            | 17           | 506       | 658       |
| GO:0009141~nucleoside triphosphate metabolic process               | 7.90E-04 | 0            | 17           | 506       | 658       |
| GO:0044255~cellular lipid metabolic process                        | 1.26E-03 | 15           | 49           | 506       | 658       |
| GO:0009206~purine ribonucleoside triphosphate biosynthetic process | 1.34E-03 | 0            | 16           | 506       | 658       |
| GO:0009201~ribonucleoside triphosphate biosynthetic process        | 1.34E-03 | 0            | 16           | 506       | 658       |
| GO:0009145~purine nucleoside triphosphate biosynthetic process     | 1.34E-03 | 0            | 16           | 506       | 658       |
| GO:0009142~nucleoside triphosphate biosynthetic process            | 1.34E-03 | 0            | 16           | 506       | 658       |
| GO:0044271~nitrogen compound biosynthetic process                  | 1.75E-03 | 2            | 21           | 506       | 658       |
| GO:0009309~amine biosynthetic process                              | 1.75E-03 | 2            | 21           | 506       | 658       |
| GO:0044237~cellular metabolic process                              | 3.12E-03 | 303          | 447          | 506       | 658       |
| GO:0015992~proton transport                                        | 3.77E-03 | 0            | 14           | 506       | 658       |
| GO:0006144~purine base metabolic process                           | 3.77E-03 | 0            | 14           | 506       | 658       |
| GO:0046034~ATP metabolic process                                   | 3.77E-03 | 0            | 14           | 506       | 658       |
| GO:0006818~hydrogen transport                                      | 3.77E-03 | 0            | 14           | 506       | 658       |
| GO:0008652~amino acid biosynthetic process                         | 4.29E-03 | 2            | 19           | 506       | 658       |
| GO:0044270~nitrogen compound catabolic process                     | 5.42E-03 | 1            | 16           | 506       | 658       |
| GO:0009310~amine catabolic process                                 | 5.42E-03 | 1            | 16           | 506       | 658       |
| GO:0009063~amino acid catabolic process                            | 5.42E-03 | 1            | 16           | 506       | 658       |
| GO:0006754~ATP biosynthetic process                                | 6.28E-03 | 0            | 13           | 506       | 658       |
| GO:0006753~nucleoside phosphate metabolic process                  | 6.28E-03 | 0            | 13           | 506       | 658       |
| GO:0015986~ATP synthesis coupled proton transport                  | 1.04E-02 | 0            | 12           | 506       | 658       |
| GO:0009064~glutamine family amino acid metabolic process           | 1.04E-02 | 0            | 12           | 506       | 658       |
| GO:0044248~cellular catabolic process                              | 1.14E-02 | 26           | 60           | 506       | 658       |
| GO:0045454~cell redox homeostasis                                  | 1.36E-02 | 1            | 14           | 506       | 658       |
| GO:0042775~organelle ATP synthesis coupled electron transport      | 1.36E-02 | 1            | 14           | 506       | 658       |
| GO:0042773~ATP synthesis coupled electron transport                | 1.36E-02 | 1            | 14           | 506       | 658       |
| GO:0006635~fatty acid beta-oxidation                               | 1.72E-02 | 0            | 11           | 506       | 658       |
| GO:0019395~fatty acid oxidation                                    | 1.72E-02 | 0            | 11           | 506       | 658       |
| GO:0009056~catabolic process                                       | 1.87E-02 | 28           | 61           | 506       | 658       |
| GO:0022618~protein-RNA complex assembly                            | 2.14E-02 | 1            | 13           | 506       | 658       |
| GO:0022613~ribonucleoprotein complex biogenesis and assembly       | 2.47E-02 | 4            | 19           | 506       | 658       |
| GO:0042440~pigment metabolic process                               | 2.81E-02 | 0            | 10           | 506       | 658       |
| GO:0006626~protein targeting to mitochondrion                      | 2.81E-02 | 0            | 10           | 506       | 658       |

|                                                              |          |     |     |     |     |
|--------------------------------------------------------------|----------|-----|-----|-----|-----|
| GO:0019748~secondary metabolic process                       | 3.32E-02 | 1   | 12  | 506 | 658 |
| GO:0007005~mitochondrion organization and biogenesis         | 3.54E-02 | 2   | 14  | 506 | 658 |
| GO:0019725~cellular homeostasis                              | 4.47E-02 | 6   | 21  | 506 | 658 |
| GO:0042592~homeostatic process                               | 4.47E-02 | 6   | 21  | 506 | 658 |
| GO:0046148~pigment biosynthetic process                      | 4.56E-02 | 0   | 9   | 506 | 658 |
| GO:0009161~ribonucleoside monophosphate metabolic process    | 4.56E-02 | 0   | 9   | 506 | 658 |
| GO:0009156~ribonucleoside monophosphate biosynthetic process | 4.56E-02 | 0   | 9   | 506 | 658 |
| GO:0009124~nucleoside monophosphate biosynthetic process     | 4.56E-02 | 0   | 9   | 506 | 658 |
| GO:0009123~nucleoside monophosphate metabolic process        | 4.56E-02 | 0   | 9   | 506 | 658 |
| GO:0006413~translational initiation                          | 5.09E-02 | 1   | 11  | 506 | 658 |
| GO:0006839~mitochondrial transport                           | 7.65E-02 | 2   | 12  | 506 | 658 |
| GO:0051187~cofactor catabolic process                        | 7.73E-02 | 1   | 10  | 506 | 658 |
| GO:0045333~cellular respiration                              | 7.73E-02 | 1   | 10  | 506 | 658 |
| GO:0006099~tricarboxylic acid cycle                          | 7.73E-02 | 1   | 10  | 506 | 658 |
| GO:0009109~coenzyme catabolic process                        | 7.73E-02 | 1   | 10  | 506 | 658 |
| GO:0009060~aerobic respiration                               | 7.73E-02 | 1   | 10  | 506 | 658 |
| GO:0046356~acetyl-CoA catabolic process                      | 7.73E-02 | 1   | 10  | 506 | 658 |
| GO:0044238~primary metabolic process                         | 8.73E-02 | 308 | 428 | 506 | 658 |
| GO:0006811~ion transport                                     | 9.59E-02 | 17  | 36  | 506 | 658 |

Table S7. Quantitative proteomic analyses of protein abundance in the fat bodies of bees fed rich vs. poor diet

| Description                                                                                                                                                                                                                                                     | P-value  | logFC protein (rich-poor) | logFC RNA (rich-poor) |
|-----------------------------------------------------------------------------------------------------------------------------------------------------------------------------------------------------------------------------------------------------------------|----------|---------------------------|-----------------------|
| GB12488-RA [PREDICTED: Apis mellifera similar to Aconitase CG9244-PB (LOC408446), mRNA]                                                                                                                                                                         | 7.18E-04 | -0.22                     | -0.20                 |
| GB11056-RA [PREDICTED: Apis mellifera similar to Phosphoglycerate kinase, transcript variant 1 (LOC411576), mRNA]                                                                                                                                               | 9.29E-04 | -0.28                     | -0.08                 |
| GB15116-RA [PREDICTED: Apis mellifera similar to CG9357-PA (LOC413705), mRNA]                                                                                                                                                                                   | 2.39E-03 | 1.40                      | -0.48                 |
| GB17503-RA [PREDICTED: Apis mellifera similar to CG8993-PA (LOC410120), mRNA]                                                                                                                                                                                   | 2.87E-03 | 0.64                      | 0.13                  |
| GB11810-RA [PREDICTED: Apis mellifera similar to Contactin CG1084-PA (LOC412312), mRNA]                                                                                                                                                                         | 4.84E-03 | -0.19                     | -0.03                 |
| GB19832-RA [PREDICTED: Apis mellifera similar to CG9514-PA (LOC408603), mRNA]                                                                                                                                                                                   | 5.50E-03 | 1.10                      | 1.25                  |
| GB14424-RA [PREDICTED: Apis mellifera similar to Nidogen/entactin CG12908-PA, isoform A (LOC408797), mRNA]                                                                                                                                                      | 6.33E-03 | -0.40                     | 0.30                  |
| GB14284-RA [PREDICTED: Apis mellifera similar to Sorbitol dehydrogenase-2 CG4649-PA (LOC408871), mRNA]                                                                                                                                                          | 1.60E-02 | 0.71                      | 2.31                  |
| GB13401-RA [PREDICTED: Apis mellifera similar to Putative aldehyde dehydrogenase family 7 member A1 homolog (ALH-9) (LOC411140), mRNA]                                                                                                                          | 1.73E-02 | 0.93                      | 1.62                  |
| GB15716-RA [PREDICTED: Apis mellifera similar to CG5028-PA (LOC410396), mRNA]                                                                                                                                                                                   | 1.84E-02 | -1.03                     | 0.33                  |
| GB19293-RA [PREDICTED: Apis mellifera mitochondrial cytochrome C (CytC), mRNA]                                                                                                                                                                                  | 1.97E-02 | -0.28                     | 0.05                  |
| GB19247-RA [PREDICTED: Apis mellifera similar to Elongation factor 2 (EF-2), transcript variant 1 (LOC409167), mRNA]                                                                                                                                            | 2.14E-02 | 0.37                      | -0.25                 |
| GB12283-RA [PREDICTED: Apis mellifera similar to MOCO sulphurase C-terminal domain containing 1 (LOC724919), mRNA]                                                                                                                                              | 2.19E-02 | -0.29                     | 0.16                  |
| GB17376-RA [PREDICTED: Apis mellifera similar to CG17560-PA (LOC724560), partial mRNA]                                                                                                                                                                          | 2.36E-02 | 1.05                      | 0.33                  |
| GB19030-RA [PREDICTED: Apis mellifera similar to CG10638-PA, isoform A, transcript variant 1 (LOC552018), mRNA]                                                                                                                                                 | 2.40E-02 | 0.66                      | 0.77                  |
| GB15016-RA [PREDICTED: Apis mellifera similar to Heat shock protein cognate 3 CG4147-PA, isoform A (LOC409587), mRNA]                                                                                                                                           | 2.85E-02 | 0.39                      | 0.16                  |
| GB19004-RA [PREDICTED: Apis mellifera similar to CG4169-PA (LOC552671), mRNA]                                                                                                                                                                                   | 3.03E-02 | -1.36                     | 0.16                  |
| GB18969-RA [PREDICTED: Apis mellifera similar to 60 kDa heat shock protein, mitochondrial precursor (Hsp60) (60 kDa chaperonin) (CPN60) (Heat shock protein 60) (HSP-60) (Mitochondrial matrix protein P1) (LOC409384), mRNA]                                   | 3.07E-02 | 0.47                      | 1.11                  |
| GB14813-RA [PREDICTED: Apis mellifera similar to Cytochrome b5 (CYTB5) (LOC726860), mRNA]                                                                                                                                                                       | 3.25E-02 | 0.31                      | -0.31                 |
| GB11403-RA [PREDICTED: Apis mellifera similar to CG6414-PA (LOC408395), mRNA]                                                                                                                                                                                   | 3.28E-02 | 0.31                      | 0.60                  |
| GB19200-RA [PREDICTED: Apis mellifera similar to Pros5 CG12323-PA, isoform A (LOC411206), mRNA]                                                                                                                                                                 | 3.41E-02 | 0.34                      | 0.19                  |
| GB14637-RA [PREDICTED: Apis mellifera similar to cAMP-dependent protein kinase R2 CG15862-PA, isoform A, transcript variant 1 (LOC409390), mRNA]                                                                                                                | 3.44E-02 | 0.37                      | -0.19                 |
| GB12198-RA [PREDICTED: Apis mellifera similar to CG3523-PA (LOC412815), mRNA]                                                                                                                                                                                   | 3.47E-02 | 0.50                      | -0.17                 |
| GB16579-RA [PREDICTED: Apis mellifera similar to CG12262-PA (LOC408567), mRNA]                                                                                                                                                                                  | 3.48E-02 | 0.85                      | 0.86                  |
| [Antisense] GB13237-RA [PREDICTED: Apis mellifera similar to Phosphogluconate mutase CG5165-PA (LOC411897), mRNA]                                                                                                                                               | 3.52E-02 | 0.17                      | -0.13                 |
| [Antisense] GB13237-RA [PREDICTED: Apis mellifera similar to Phosphogluconate mutase CG5165-PA (LOC411897), mRNA]                                                                                                                                               | 3.52E-02 | 0.17                      | 0.20                  |
| GB13237-RA [PREDICTED: Apis mellifera similar to Phosphogluconate mutase CG5165-PA (LOC411897), mRNA]                                                                                                                                                           | 3.52E-02 | 0.17                      | -0.13                 |
| GB13237-RA [PREDICTED: Apis mellifera similar to Phosphogluconate mutase CG5165-PA (LOC411897), mRNA]                                                                                                                                                           | 3.52E-02 | 0.17                      | 0.20                  |
| GB19888-RA [PREDICTED: Apis mellifera similar to Electron transfer flavoprotein-ubiquinone oxidoreductase, mitochondrial precursor (ETF-QO) (ETF-ubiquinone oxidoreductase) (ETF dehydrogenase) (Electron-transferring-flavoprotein dehydrogenase), transcript] | 3.54E-02 | 0.26                      | 0.49                  |
| GB14324-RA [PREDICTED: Apis mellifera similar to Adenosylhomocysteinase at 13 CG11654-PA (LOC408368), mRNA]                                                                                                                                                     | 3.56E-02 | 0.51                      | 0.39                  |
| GB19321-RA [PREDICTED: Apis mellifera similar to COP9 signalosome subunit 6 (LOC410195), mRNA]                                                                                                                                                                  | 4.27E-02 | -0.28                     | 0.17                  |
| GB10695-RA [PREDICTED: Apis mellifera similar to Pyruvate kinase CG7070-PB, isoform B (LOC552007), mRNA]                                                                                                                                                        | 4.42E-02 | -0.45                     | -0.14                 |
| GB16459-RA [Apis mellifera major royal jelly protein 3 (Mrjp3), mRNA]                                                                                                                                                                                           | 4.46E-02 | 2.00                      | -0.06                 |
| GB15408-RA [PREDICTED: Apis mellifera similar to CG8798-PA, isoform A (LOC409459), mRNA]                                                                                                                                                                        | 4.53E-02 | 0.33                      | 0.54                  |
| GB17876-RA [PREDICTED: Apis mellifera similar to Calcium-transporting ATPase sarcoplasmic/endoplasmic reticulum type (Calcium pump), transcript variant 1 (LOC410371), mRNA]                                                                                    | 4.73E-02 | -1.10                     | -0.41                 |
| GB11655-RA [PREDICTED: Apis mellifera similar to Succinyl coenzyme A synthetase subunit CG1065-PA (LOC551403), mRNA]                                                                                                                                            | 4.74E-02 | -0.31                     | -0.04                 |
| GB16882-RA [PREDICTED: Apis mellifera similar to walrus CG8996-PB, isoform B, transcript variant 1 (LOC551710), mRNA]                                                                                                                                           | 4.88E-02 | 0.50                      | 0.43                  |
| GB18719-RA [PREDICTED: Apis mellifera similar to R04B5.5 (LOC410167), mRNA]                                                                                                                                                                                     | 4.94E-02 | 0.84                      | 1.05                  |
| GB15052-RA [PREDICTED: Apis mellifera similar to Phosphoglyceromutase CG1721-PA, isoform A (LOC552736), mRNA]                                                                                                                                                   | 4.94E-02 | -0.27                     | -0.28                 |
| GB18162-RA [PREDICTED: Apis mellifera similar to Peroxisomal multifunctional enzyme type 2 (MFE-2) (D-bifunctional protein) (DBP) (17-beta-hydroxysteroid dehydrogenase 4) (17-beta-HSD 4) (LOC409986), mRNA]                                                   | 5.01E-02 | 0.76                      | 0.20                  |

|                                                                                                                                                                                                             |          |       |       |
|-------------------------------------------------------------------------------------------------------------------------------------------------------------------------------------------------------------|----------|-------|-------|
| GB11059-RA [PREDICTED: Apis mellifera similar to Retinoid- and fatty-acid binding protein CG11064-PA, transcript variant 1 (LOC408961), mRNA]                                                               | 5.16E-02 | -0.17 | NA    |
| GB19878-RA [PREDICTED: Apis mellifera similar to Rpt3 CG16916-PA (LOC410026), mRNA]                                                                                                                         | 5.17E-02 | 0.33  | -0.16 |
| GB18077-RA [PREDICTED: Apis mellifera similar to CG31004-PA, isoform A, transcript variant 1 (LOC408878), mRNA]                                                                                             | 5.19E-02 | -0.70 | -0.57 |
| GB11665-RA [PREDICTED: Apis mellifera similar to Imaginal disc growth factor 4 CG1780-PA, isoform A (LOC413324), mRNA]                                                                                      | 5.19E-02 | -0.47 | 0.75  |
| GB10771-RA [PREDICTED: Apis mellifera epoxide hydrolase (LOC406152), mRNA]                                                                                                                                  | 5.23E-02 | 0.91  | 0.59  |
| GB12338-RA [PREDICTED: Apis mellifera similar to 60S acidic ribosomal protein P0 (DNA- (apurinic or apyrimidinic site) lyase) (Apurinic-apyrimidinic endonuclease), transcript variant 1 (LOC550711), mRNA] | 5.62E-02 | -0.84 | 0.04  |
| GB15518-RA [PREDICTED: Apis mellifera similar to CG9380-PA, isoform A (LOC552843), mRNA]                                                                                                                    | 5.74E-02 | -0.96 | -0.55 |
| GB12029-RA [PREDICTED: Apis mellifera similar to CG1532-PA (LOC552722), mRNA]                                                                                                                               | 5.93E-02 | 0.38  | 0.23  |
| GB16448-RA [PREDICTED: Apis mellifera similar to Annexin-B9 (Annexin-9) (Annexin IX), transcript variant 1 (LOC409533), mRNA]                                                                               | 6.03E-02 | 0.47  | 0.27  |
| GB14517-RA [PREDICTED: Apis mellifera similar to Isocitrate dehydrogenase CG7176-PC, isoform C, transcript variant 2 (LOC551276), mRNA]                                                                     | 6.26E-02 | 0.66  | 0.68  |
| GB10312-RA [PREDICTED: Apis mellifera similar to CG7461-PA (LOC412025), mRNA]                                                                                                                               | 6.32E-02 | 0.46  | 0.63  |
| GB13772-RA [PREDICTED: Apis mellifera similar to Puromycin sensitive aminopeptidase CG1009-PC, isoform C, transcript variant 1 (LOC410769), mRNA]                                                           | 6.45E-02 | 0.43  | 0.29  |
| GB14678-RA [PREDICTED: Apis mellifera similar to Tat-binding protein-1 CG10370-PA (LOC409198), mRNA]                                                                                                        | 6.56E-02 | 0.23  | -0.20 |
| GB11385-RA [PREDICTED: Apis mellifera similar to CG3731-PB, isoform B (LOC410022), mRNA]                                                                                                                    | 6.58E-02 | -0.84 | 0.57  |
| GB13514-RA [PREDICTED: Apis mellifera similar to CG11790-PA, isoform A (LOC411255), mRNA]                                                                                                                   | 6.63E-02 | 0.23  | 0.07  |
| GB12741-RA [PREDICTED: Apis mellifera similar to Aldehyde dehydrogenase CG3752-PA, transcript variant 1 (LOC550687), mRNA]                                                                                  | 6.66E-02 | 0.60  | 1.84  |
| GB17035-RA [PREDICTED: Apis mellifera similar to CG15828-PB, isoform B (LOC410793), mRNA]                                                                                                                   | 6.73E-02 | -0.44 | -0.06 |
| GB15648-RA [PREDICTED: Apis mellifera similar to 60S ribosomal protein L9 (LOC551107), mRNA]                                                                                                                | 6.90E-02 | -0.82 | -0.29 |
| GB15637-RA [PREDICTED: Apis mellifera similar to 40S ribosomal protein S3 (LOC551330), mRNA]                                                                                                                | 7.07E-02 | -0.77 | -0.20 |
| GB17223-RA [PREDICTED: Apis mellifera similar to CG5590-PA (LOC552717), mRNA]                                                                                                                               | 7.11E-02 | 0.59  | 0.42  |
| GB11202-RA [PREDICTED: Apis mellifera similar to Laminin A CG10236-PA (LOC412663), partial mRNA]                                                                                                            | 7.16E-02 | -0.68 | NA    |
| [Antisense] GB17056-RA [PREDICTED: Apis mellifera similar to Cyclophilin 1 CG9916-PA (LOC409890), mRNA]                                                                                                     | 7.18E-02 | 0.16  | 0.07  |
| [Antisense] GB17056-RA [PREDICTED: Apis mellifera similar to Cyclophilin 1 CG9916-PA (LOC409890), mRNA]                                                                                                     | 7.18E-02 | 0.16  | 0.72  |
| [Antisense] GB17056-RA [PREDICTED: Apis mellifera similar to Cyclophilin 1 CG9916-PA (LOC409890), mRNA]                                                                                                     | 7.18E-02 | 0.16  | 0.55  |
| GB17056-RA [PREDICTED: Apis mellifera similar to Cyclophilin 1 CG9916-PA (LOC409890), mRNA]                                                                                                                 | 7.18E-02 | 0.16  | 0.07  |
| GB17056-RA [PREDICTED: Apis mellifera similar to Cyclophilin 1 CG9916-PA (LOC409890), mRNA]                                                                                                                 | 7.18E-02 | 0.16  | 0.72  |
| GB17056-RA [PREDICTED: Apis mellifera similar to Cyclophilin 1 CG9916-PA (LOC409890), mRNA]                                                                                                                 | 7.18E-02 | 0.16  | 0.55  |
| GB17056-RA [PREDICTED: Apis mellifera similar to Cyclophilin 1 CG9916-PA (LOC409890), mRNA]                                                                                                                 | 7.18E-02 | 0.16  | 0.07  |
| GB17056-RA [PREDICTED: Apis mellifera similar to Cyclophilin 1 CG9916-PA (LOC409890), mRNA]                                                                                                                 | 7.18E-02 | 0.16  | 0.72  |
| GB17056-RA [PREDICTED: Apis mellifera similar to Cyclophilin 1 CG9916-PA (LOC409890), mRNA]                                                                                                                 | 7.18E-02 | 0.16  | 0.55  |
| GB18952-RA [PREDICTED: Apis mellifera similar to Acetyl-CoA acetyltransferase, mitochondrial precursor (Acetoacetyl-CoA thiolase) (LOC726218), mRNA]                                                        | 7.40E-02 | 0.36  | 0.66  |
| GB15113-RB [PREDICTED: Apis mellifera similar to hu li tai shao CG9325-PB, isoform B (LOC409713), mRNA]                                                                                                     | 7.54E-02 | -0.27 | -0.34 |
| GB12681-RA [PREDICTED: Apis mellifera similar to Aldehyde dehydrogenase type III CG11140-PI, isoform I (LOC411822), mRNA]                                                                                   | 7.55E-02 | 0.86  | 0.75  |
| GB12956-RA [PREDICTED: Apis mellifera similar to yippee interacting protein 2 CG4600-PA (LOC408291), mRNA]                                                                                                  | 7.64E-02 | 0.32  | 0.55  |
| GB13999-RA [Apis mellifera vitellogenin (Vg), mRNA]                                                                                                                                                         | 8.02E-02 | 1.64  | 3.50  |
| GB16864-RA [PREDICTED: Apis mellifera similar to CG4389-PA, isoform A (LOC410325), mRNA]                                                                                                                    | 8.95E-02 | 0.35  | 0.13  |
| GB18498-RA [PREDICTED: Apis mellifera enoyl Coenzyme A hydratase, short chain, 1, mitochondrial (Echs1), mRNA]                                                                                              | 9.00E-02 | 0.52  | 0.93  |
| GB14849-RA [PREDICTED: Apis mellifera similar to Putative deoxyribose-phosphate aldolase (Phosphodeoxyriboaldolase) (Deoxyriboaldolase) (DERA) (LOC551986), mRNA]                                           | 9.01E-02 | 0.72  | 0.79  |
| GB12182-RA [PREDICTED: Apis mellifera similar to Thiolase CG4581-PA (LOC551775), mRNA]                                                                                                                      | 9.13E-02 | 0.54  | 0.21  |
| GB11749-RA [PREDICTED: Apis mellifera similar to Calcium-binding mitochondrial carrier Aralar1 (LOC408967), partial mRNA]                                                                                   | 9.22E-02 | -0.81 | 0.01  |
| GB16246-RA [Apis mellifera major royal jelly protein 2 (Mrjp2), mRNA]                                                                                                                                       | 9.22E-02 | 2.89  | -0.50 |
| GB16246-RA [Apis mellifera major royal jelly protein 2 (Mrjp2), mRNA]                                                                                                                                       | 9.22E-02 | 2.89  | 0.22  |

|                                                                                                                                                                                                                                    |          |       |       |
|------------------------------------------------------------------------------------------------------------------------------------------------------------------------------------------------------------------------------------|----------|-------|-------|
| GB16246-RA [Apis mellifera major royal jelly protein 2 (Mrjp2), mRNA]                                                                                                                                                              | 9.22E-02 | 2.89  | -0.50 |
| GB16246-RA [Apis mellifera major royal jelly protein 2 (Mrjp2), mRNA]                                                                                                                                                              | 9.22E-02 | 2.89  | 0.22  |
| GB15664-RA [PREDICTED: Apis mellifera similar to karst CG12008-PA, isoform A (LOC413332), mRNA]                                                                                                                                    | 1.00E-01 | -0.34 | -0.27 |
| GB13135-RA [PREDICTED: Apis mellifera similar to Ras-like GTP-binding protein Rho1, transcript variant 2 (LOC409910), mRNA]                                                                                                        | 1.01E-01 | 1.05  | -0.21 |
| GB13135-RA [PREDICTED: Apis mellifera similar to Ras-like GTP-binding protein Rho1, transcript variant 2 (LOC409910), mRNA]                                                                                                        | 1.01E-01 | 1.05  | -0.16 |
| GB13135-RA [PREDICTED: Apis mellifera similar to Ras-like GTP-binding protein Rho1, transcript variant 2 (LOC409910), mRNA]                                                                                                        | 1.01E-01 | 1.05  | -0.21 |
| GB13135-RA [PREDICTED: Apis mellifera similar to Ras-like GTP-binding protein Rho1, transcript variant 2 (LOC409910), mRNA]                                                                                                        | 1.01E-01 | 1.05  | -0.16 |
| GB10339-RA [PREDICTED: Apis mellifera similar to Protein lethal(2)essential for life (Protein Efl21), transcript variant 1 (LOC410857), mRNA]                                                                                      | 1.04E-01 | -0.91 | -0.53 |
| GB16526-RA [PREDICTED: Apis mellifera similar to Proteasome subunit alpha type 5 (Proteasome zeta chain) (Macropain zeta chain) (Multicatalytic endopeptidase complex zeta chain) (LOC551956), mRNA]                               | 1.07E-01 | 0.29  | 0.28  |
| GB16563-RA [PREDICTED: Apis mellifera similar to Trap1 CG3152-PA, transcript variant 1 (LOC550968), mRNA]                                                                                                                          | 1.11E-01 | 0.37  | 0.06  |
| GB13680-RA [PREDICTED: Apis mellifera similar to 3-hydroxyacyl-CoA dehydrogenase type-2 (3-hydroxyacyl-CoA dehydrogenase type II) (Type II HADH) (3-hydroxy-2-methylbutyryl-CoA dehydrogenase) (Scully protein) (LOC725274), mRNA] | 1.11E-01 | 0.53  | 0.87  |
| GB12732-RA [PREDICTED: Apis mellifera similar to Proteasome subunit alpha type 3 (Proteasome component C8) (Macropain subunit C8) (Multicatalytic endopeptidase complex subunit C8) (LOC408986), mRNA]                             | 1.13E-01 | 0.28  | 0.13  |
| GB19208-RA [PREDICTED: Apis mellifera similar to sar1 CG7073-PA, isoform A, transcript variant 2 (LOC409613), mRNA]                                                                                                                | 1.14E-01 | 1.16  | 0.19  |
| GB17517-RA [PREDICTED: Apis mellifera similar to CG32702-PA (LOC411053), mRNA]                                                                                                                                                     | 1.16E-01 | -0.52 | 0.19  |
| GB15990-RA [Apis mellifera FABP-like protein (Fabp), mRNA]                                                                                                                                                                         | 1.16E-01 | 0.70  | -0.14 |
| GB16184-RA [PREDICTED: Apis mellifera similar to lethal (2) 44DEa CG8732-PB, isoform B, transcript variant 1 (LOC409515), mRNA]                                                                                                    | 1.17E-01 | 0.26  | -0.07 |
| GB19935-RA [PREDICTED: Apis mellifera similar to CG3609-PA (LOC552024), mRNA]                                                                                                                                                      | 1.18E-01 | 1.59  | 3.85  |
| GB15796-RA [PREDICTED: Apis mellifera similar to squid CG16901-PC, isoform C, transcript variant 1 (LOC408936), mRNA]                                                                                                              | 1.18E-01 | -0.38 | 0.13  |
| GB14888-RA [Apis mellifera major royal jelly protein 1 (Mrjp1), mRNA]                                                                                                                                                              | 1.18E-01 | 2.30  | NA    |
| GB16903-RA [PREDICTED: Apis mellifera similar to cathD CG1548-PA (LOC409341), mRNA]                                                                                                                                                | 1.22E-01 | 0.57  | 0.02  |
| GB14205-RA [PREDICTED: Apis mellifera similar to CG11267-PA (LOC552531), mRNA]                                                                                                                                                     | 1.23E-01 | 0.34  | 1.16  |
| GB12383-RA [PREDICTED: Apis mellifera similar to Succinyl-CoA:3-ketoacid-coenzyme A transferase 1, mitochondrial precursor (Somatic-type succinyl CoA:3-oxoacid CoA-transferase) (Scot-S) (LOC409157), mRNA]                       | 1.23E-01 | 0.32  | 0.07  |
| GB12841-RA [PREDICTED: Apis mellifera similar to CG7580-PA (LOC726747), mRNA]                                                                                                                                                      | 1.24E-01 | -1.00 | 0.16  |
| GB12125-RA [PREDICTED: Apis mellifera similar to CG6465-PA (LOC408969), mRNA]                                                                                                                                                      | 1.27E-01 | 0.73  | 0.76  |
| GB16803-RA [PREDICTED: Apis mellifera similar to Probable cytochrome P450 9f2 (CYP1XF2) (LOC410490), mRNA]                                                                                                                         | 1.28E-01 | 0.32  | 0.15  |
| GB12113-RA [PREDICTED: Apis mellifera similar to porin CG6647-PA, isoform A (LOC551325), mRNA]                                                                                                                                     | 1.28E-01 | -1.56 | NA    |
| GB12144-RA [PREDICTED: Apis mellifera similar to Vesicular-fusion protein Nsf1 (N-ethylmaleimide-sensitive fusion protein 1) (NEM-sensitive fusion protein 1) (dNsf-1) (Protein comatose), transcript variant 1 (LOC725680), mRNA] | 1.32E-01 | -0.19 | 0.22  |
| GB17531-RA [PREDICTED: Apis mellifera similar to Dihydropteridine reductase CG4665-PA, isoform A (LOC409160), mRNA]                                                                                                                | 1.35E-01 | 0.43  | 0.57  |
| GB12049-RA [PREDICTED: Apis mellifera similar to Putative actin-interacting protein 1 (AIP1) (LOC412495), mRNA]                                                                                                                    | 1.35E-01 | 0.08  | 0.04  |
| GB11892-RA [PREDICTED: Apis mellifera similar to Glycogen phosphorylase, transcript variant 2 (LOC409267), mRNA]                                                                                                                   | 1.36E-01 | 0.40  | 0.10  |
| GB20013-RA [PREDICTED: Apis mellifera similar to Rpt4 CG3455-PA (LOC551386), mRNA]                                                                                                                                                 | 1.37E-01 | 0.29  | 0.14  |
| GB18042-RA [PREDICTED: Apis mellifera similar to Oligosaccharyltransferase 48kD subunit CG9022-PA, transcript variant 1 (LOC552051), mRNA]                                                                                         | 1.38E-01 | -0.56 | 0.42  |
| GB19380-RA [PREDICTED: Apis mellifera similar to thioredoxin peroxidase 1 CG1633-PA, isoform A, transcript variant 1 (LOC409954), mRNA]                                                                                            | 1.38E-01 | 0.57  | 0.32  |
| GB18667-RA [PREDICTED: Apis mellifera similar to CG1440-PA (LOC724901), mRNA]                                                                                                                                                      | 1.41E-01 | -0.45 | 0.06  |
| GB14141-RA [PREDICTED: Apis mellifera similar to cheerio CG3937-PD, isoform D (LOC409697), mRNA]                                                                                                                                   | 1.45E-01 | -0.15 | 0.16  |
| GB12135-RA [PREDICTED: Apis mellifera similar to CG1213-PA, isoform A (LOC413575), mRNA]                                                                                                                                           | 1.47E-01 | -0.96 | 0.07  |
| GB10469-RA [PREDICTED: Apis mellifera similar to klingon CG6669-PA (LOC409091), mRNA]                                                                                                                                              | 1.49E-01 | -0.35 | 0.04  |
| GB15327-RA [Apis mellifera juvenile hormone esterase (Jhe), mRNA]                                                                                                                                                                  | 1.49E-01 | 0.96  | 1.90  |
| GB14798-RA [PREDICTED: Apis mellifera similar to Glyceraldehyde 3 phosphate dehydrogenase 1 CG12055-PA, isoform A, transcript variant 2 (LOC410122), mRNA]                                                                         | 1.49E-01 | -0.25 | -0.05 |
| GB13004-RA [PREDICTED: Apis mellifera similar to CG12163-PA, isoform A (LOC408851), mRNA]                                                                                                                                          | 1.51E-01 | -0.48 | -0.30 |
| GB17353-RA [PREDICTED: Apis mellifera similar to CG7433-PA, isoform A, transcript variant 1 (LOC408955), mRNA]                                                                                                                     | 1.51E-01 | -0.53 | 0.13  |
| GB12230-RA [PREDICTED: Apis mellifera hypothetical protein LOC406120 (LOC406120),                                                                                                                                                  | 1.53E-01 | -0.61 | -0.23 |

|                                                                                                                                                                                                                               |          |       |       |
|-------------------------------------------------------------------------------------------------------------------------------------------------------------------------------------------------------------------------------|----------|-------|-------|
| mRNA]                                                                                                                                                                                                                         |          |       |       |
| GB12326-RA [PREDICTED: Apis mellifera similar to Ornithine aminotransferase precursor CG8782-PA (LOC410583), mRNA]                                                                                                            | 1.54E-01 | 0.73  | 0.31  |
| GB16951-RA [PREDICTED: Apis mellifera similar to Malic enzyme CG10120-PB, isoform B, transcript variant 1 (LOC411813), partial mRNA]                                                                                          | 1.55E-01 | 0.88  | 0.07  |
| GB13058-RA [PREDICTED: Apis mellifera similar to dihydroxyacetone kinase 2 (LOC413697), mRNA]                                                                                                                                 | 1.57E-01 | 0.56  | 1.34  |
| GB19460-RA [PREDICTED: Apis mellifera similar to Aldolase CG6058-PF, isoform F (LOC550785), mRNA]                                                                                                                             | 1.57E-01 | 0.27  | 0.51  |
| GB19460-RA [PREDICTED: Apis mellifera similar to Aldolase CG6058-PF, isoform F (LOC550785), mRNA]                                                                                                                             | 1.57E-01 | 0.27  | 0.40  |
| GB19460-RA [PREDICTED: Apis mellifera similar to Aldolase CG6058-PF, isoform F (LOC550785), mRNA]                                                                                                                             | 1.57E-01 | 0.27  | 0.51  |
| GB19460-RA [PREDICTED: Apis mellifera similar to Aldolase CG6058-PF, isoform F (LOC550785), mRNA]                                                                                                                             | 1.57E-01 | 0.27  | 0.40  |
| GB14138-RA [PREDICTED: Apis mellifera putative thioredoxin peroxidase (Gtpx-1), mRNA]                                                                                                                                         | 1.57E-01 | 0.24  | -0.02 |
| GB15053-RA [PREDICTED: Apis mellifera similar to Rpt1 CG1341-PA (LOC551343), mRNA]                                                                                                                                            | 1.58E-01 | 0.24  | 0.32  |
| GB18955-RA [PREDICTED: Apis mellifera similar to Phospholipid hydroperoxide glutathione peroxidase, mitochondrial precursor (PHGPx) (GPX-4) (LOC726269), mRNA]                                                                | 1.64E-01 | -0.19 | -0.39 |
| GB11846-RA [PREDICTED: Apis mellifera similar to Neuroglian CG1634-PA, isoform A (LOC411829), mRNA]                                                                                                                           | 1.64E-01 | -0.51 | -0.01 |
| GB19498-RA [PREDICTED: Apis mellifera similar to bendless CG18319-PA (LOC409386), mRNA]                                                                                                                                       | 1.65E-01 | 0.36  | 0.08  |
| GB10560-RA [Apis mellifera translation elongation factor eEF-1 alpha chain (LOC408385), mRNA]                                                                                                                                 | 1.66E-01 | -0.28 | 0.40  |
| GB19166-RA [PREDICTED: Apis mellifera similar to Rab-protein 1 CG3320-PA, isoform A (LOC409456), mRNA]                                                                                                                        | 1.71E-01 | 0.61  | -0.20 |
| GB11973-RA [Apis mellifera cytochrome P450 monooxygenase (Cyp4g11), mRNA]                                                                                                                                                     | 1.73E-01 | 0.78  | -0.18 |
| GB11431-RA [PREDICTED: Apis mellifera similar to Nucleosome remodeling factor - 38kD CG4634-PA (LOC409774), mRNA]                                                                                                             | 1.77E-01 | 0.66  | 0.46  |
| GB17377-RA [PREDICTED: Apis mellifera similar to CG2604-PA, isoform A, transcript variant 1 (LOC552075), mRNA]                                                                                                                | 1.81E-01 | 0.73  | -0.02 |
| GB20017-RA [PREDICTED: Apis mellifera similar to TER94 CG2331-PA, isoform A, transcript variant 1 (LOC409377), mRNA]                                                                                                          | 1.81E-01 | 0.17  | 0.43  |
| GB15619-RA [PREDICTED: Apis mellifera similar to CG8036-PB, isoform B, transcript variant 1 (LOC550804), mRNA]                                                                                                                | 1.83E-01 | 0.68  | 0.65  |
| GB20012-RA [PREDICTED: Apis mellifera similar to CG10664-PA, isoform A (LOC412396), mRNA]                                                                                                                                     | 1.85E-01 | -0.95 | -0.04 |
| GB18647-RA [PREDICTED: Apis mellifera similar to lethal (2) 37Cc CG10691-PA, isoform A (LOC408412), mRNA]                                                                                                                     | 1.86E-01 | -0.54 | 0.33  |
| GB12567-RA [PREDICTED: Apis mellifera similar to bubblegum CG4501-PA (LOC551837), partial mRNA]                                                                                                                               | 1.87E-01 | 0.21  | -0.29 |
| GB10238-RA [PREDICTED: Apis mellifera similar to ERp60 CG8983-PA, isoform A, transcript variant 2 (LOC409911), mRNA]                                                                                                          | 1.88E-01 | 0.37  | 0.12  |
| GB18109-RA [PREDICTED: Apis mellifera similar to CG6084-PA, isoform A, transcript variant 1 (LOC551968), mRNA]                                                                                                                | 1.89E-01 | 0.87  | 1.60  |
| GB19351-RA                                                                                                                                                                                                                    | 1.91E-01 | 0.41  | 0.32  |
| GB19082-RA [PREDICTED: Apis mellifera similar to stubarista CG14792-PA, isoform A (LOC410486), mRNA]                                                                                                                          | 1.92E-01 | -0.68 | -0.46 |
| GB11482-RA [PREDICTED: Apis mellifera similar to Proteasome subunit alpha type 4 (Proteasome component C9) (Macropain subunit C9) (Multicatalytic endopeptidase complex subunit C9) (Proteasome subunit L) (LOC413757), mRNA] | 1.95E-01 | 0.31  | 0.00  |
| GB11786-RA [PREDICTED: Apis mellifera similar to CG2947-PA, isoform A, transcript variant 1 (LOC411171), mRNA]                                                                                                                | 1.97E-01 | 0.61  | 0.41  |
| GB14621-RA [PREDICTED: Apis mellifera similar to Protein lethal(2)essential for life (Protein Efl21) (LOC724488), mRNA]                                                                                                       | 1.98E-01 | -0.83 | 0.72  |
| GB16443-RA [PREDICTED: Apis mellifera similar to lethal (1) G0334 CG7010-PD, isoform D, transcript variant 1 (LOC551103), mRNA]                                                                                               | 1.98E-01 | 0.60  | -0.20 |
| GB18045-RA [PREDICTED: Apis mellifera glutathione-S-transferase 1 (Gst1), mRNA]                                                                                                                                               | 2.01E-01 | 0.52  | 0.31  |
| GB12855-RA [PREDICTED: Apis mellifera similar to Neural conserved at 73EF CG11661-PA, isoform A, transcript variant 1 (LOC408286), mRNA]                                                                                      | 2.05E-01 | -0.09 | -0.06 |
| GB20080-RA [PREDICTED: Apis mellifera similar to T-complex protein 1 subunit alpha (TCP-1-alpha) (CCT-alpha), transcript variant 1 (LOC409134), mRNA]                                                                         | 2.06E-01 | -0.37 | 0.12  |
| GB14972-RA [PREDICTED: Apis mellifera thioredoxin reductase, transcript variant 2 (Trxr-1), mRNA]                                                                                                                             | 2.07E-01 | 0.46  | 0.07  |
| GB17548-RA [PREDICTED: Apis mellifera similar to CG3603-PA (LOC552493), mRNA]                                                                                                                                                 | 2.09E-01 | 0.27  | 0.83  |
| GB15779-RA [PREDICTED: Apis mellifera similar to Zwischenferment CG12529-PA, isoform A (LOC725325), mRNA]                                                                                                                     | 2.10E-01 | 0.54  | 0.03  |
| GB15629-RA [PREDICTED: Apis mellifera similar to ATP synthase O subunit, mitochondrial precursor (Oligomycin sensitivity conferral protein) (OSCP) (LOC409236), mRNA]                                                         | 2.12E-01 | -0.44 | -0.02 |
| GB15807-RA [PREDICTED: Apis mellifera similar to CG17896-PB, isoform B (LOC409736), mRNA]                                                                                                                                     | 2.18E-01 | 0.83  | 0.83  |
| GB13045-RA [PREDICTED: Apis mellifera similar to CG4685-PA, isoform A (LOC412305), mRNA]                                                                                                                                      | 2.19E-01 | -0.21 | 0.60  |
| GB10973-RA [Apis mellifera arginine kinase (Argk), mRNA]                                                                                                                                                                      | 2.22E-01 | -0.22 | 0.58  |
| GB19724-RA [PREDICTED: Apis mellifera similar to Eukaryotic initiation factor 4A (ATP-dependent RNA helicase eIF4A) (eIF-4A), transcript variant 2 (LOC411989), mRNA]                                                         | 2.28E-01 | -0.13 | 0.05  |





|                                                                                                                                                                  |          |       |       |  |
|------------------------------------------------------------------------------------------------------------------------------------------------------------------|----------|-------|-------|--|
| mRNA]                                                                                                                                                            |          |       |       |  |
| GB17673-RA [PREDICTED: Apis mellifera similar to rhea CG6831-PA (LOC408396), partial mRNA]                                                                       | 2.66E-01 | -0.18 | -0.27 |  |
| GB17673-RA [PREDICTED: Apis mellifera similar to rhea CG6831-PA (LOC408396), partial mRNA]                                                                       | 2.66E-01 | -0.18 | 0.47  |  |
| GB17673-RA [PREDICTED: Apis mellifera similar to rhea CG6831-PA (LOC408396), partial mRNA]                                                                       | 2.66E-01 | -0.18 | -0.03 |  |
| GB17673-RA [PREDICTED: Apis mellifera similar to rhea CG6831-PA (LOC408396), partial mRNA]                                                                       | 2.66E-01 | -0.18 | -0.27 |  |
| GB16792-RA [PREDICTED: Apis mellifera similar to Lamin CG6944-PA (LOC413222), partial mRNA]                                                                      | 2.73E-01 | -0.42 | -0.06 |  |
| GB15662-RA [PREDICTED: Apis mellifera similar to CG10962-PB, isoform B (LOC724721), mRNA]                                                                        | 2.73E-01 | -0.28 | -0.73 |  |
| GB10732-RA [PREDICTED: Apis mellifera similar to CG2918-PA (LOC551763), mRNA]                                                                                    | 2.74E-01 | 0.39  | -0.06 |  |
| GB14791-RA [PREDICTED: Apis mellifera similar to bellwether CG3612-PA, transcript variant 1 (LOC409114), mRNA]                                                   | 2.77E-01 | -0.35 | 0.29  |  |
| GB13160-RA [PREDICTED: Apis mellifera similar to pugilist CG4067-PA, isoform A, transcript variant 1 (LOC550749), mRNA]                                          | 2.79E-01 | 0.32  | 1.68  |  |
| GB12526-RA [PREDICTED: Apis mellifera similar to lethal (2) k05713 CG8256-PC, isoform C (LOC551904), mRNA]                                                       | 2.82E-01 | -0.20 | 0.20  |  |
| GB19347-RA [PREDICTED: Apis mellifera similar to pericardin CG5700-PB (LOC724749), mRNA]                                                                         | 2.93E-01 | -0.30 | 2.38  |  |
| GB19582-RA [PREDICTED: Apis mellifera similar to Serine protease inhibitor 5 CG18525-PA, isoform A (LOC413749), mRNA]                                            | 2.96E-01 | -0.34 | 0.31  |  |
| GB19078-RA [PREDICTED: Apis mellifera similar to phosphoserine aminotransferase 1 isoform 1 (LOC412670), mRNA]                                                   | 2.97E-01 | 0.77  | 1.68  |  |
| GB19465-RA [PREDICTED: Apis mellifera similar to CG3195-PA, isoform A (LOC550715), mRNA]                                                                         | 3.01E-01 | -0.61 | 0.08  |  |
| GB15225-RA [PREDICTED: Apis mellifera similar to Ribosomal protein S7 CG1883-PA, isoform A (LOC552564), mRNA]                                                    | 3.03E-01 | 0.50  | -0.23 |  |
| GB12364-RA [PREDICTED: Apis mellifera similar to fumarylacetoacetate hydrolase domain containing 2A, transcript variant 2 (LOC410635), mRNA]                     | 3.10E-01 | 0.34  | 0.99  |  |
| GB19305-RA [PREDICTED: Apis mellifera similar to Ribosomal protein S4 CG11276-PA, isoform A, transcript variant 1 (LOC550651), mRNA]                             | 3.11E-01 | -0.80 | 0.01  |  |
| GB11744-RA [PREDICTED: Apis mellifera similar to CG12876-PA (LOC412662), mRNA]                                                                                   | 3.16E-01 | 0.16  | 0.12  |  |
| GB16881-RA [Apis mellifera troponin T (TpnT), mRNA]                                                                                                              | 3.17E-01 | -0.88 | -0.19 |  |
| GB17684-RA [PREDICTED: Apis mellifera similar to CG11198-PA, isoform A, transcript variant 2 (LOC552286), mRNA]                                                  | 3.18E-01 | 0.07  | -0.06 |  |
| GB18819-RA [Apis mellifera antennal-specific protein 3c precursor (Asp3c), mRNA]                                                                                 | 3.18E-01 | 0.37  | -0.17 |  |
| GB18292-RA [PREDICTED: Apis mellifera similar to 26S protease regulatory subunit 8, transcript variant 1 (LOC550794), mRNA]                                      | 3.19E-01 | 0.17  | -0.10 |  |
| GB12633-RA [PREDICTED: Apis mellifera similar to Ribosomal protein L23 CG3661-PA (LOC409294), mRNA]                                                              | 3.21E-01 | -0.64 | 0.01  |  |
| GB15172-RA [PREDICTED: Apis mellifera similar to lethal (1) G0255 CG4094-PA, isoform A (LOC724321), mRNA]                                                        | 3.24E-01 | -0.53 | 0.42  |  |
| GB17282-RA [PREDICTED: Apis mellifera similar to Calreticulin CG9429-PA, transcript variant 1 (LOC409165), mRNA]                                                 | 3.27E-01 | 0.17  | 0.22  |  |
| GB18737-RA [PREDICTED: Apis mellifera similar to 15-hydroxyprostaglandin dehydrogenase (LOC551423), mRNA]                                                        | 3.28E-01 | 2.01  | 0.99  |  |
| GB10139-RA [PREDICTED: Apis mellifera similar to Glutamine synthetase 2 CG1743-PC, isoform C (LOC410066), mRNA]                                                  | 3.29E-01 | -0.46 | 0.40  |  |
| GB11643-RA [PREDICTED: Apis mellifera similar to ribosomal protein L7a (LOC409528), mRNA]                                                                        | 3.32E-01 | -0.61 | -0.12 |  |
| GB17626-RA [PREDICTED: Apis mellifera similar to CG7430-PA, transcript variant 1 (LOC551039), mRNA]                                                              | 3.33E-01 | -0.22 | 0.16  |  |
| GB12562-RA [PREDICTED: Apis mellifera similar to CG10513-PA, transcript variant 1 (LOC408421), mRNA]                                                             | 3.36E-01 | 0.26  | 0.09  |  |
| GB20152-RA [PREDICTED: Apis mellifera similar to CG6370-PA (LOC412045), mRNA]                                                                                    | 3.37E-01 | -0.28 | 0.18  |  |
| GB13730-RA [PREDICTED: Apis mellifera similar to GDP dissociation inhibitor CG4422-PA (LOC411765), mRNA]                                                         | 3.38E-01 | 0.19  | 0.44  |  |
| GB11283-RA [PREDICTED: Apis mellifera similar to transaldolase 1 (LOC413867), mRNA]                                                                              | 3.41E-01 | 0.82  | 0.31  |  |
| GB18920-RA [PREDICTED: Apis mellifera similar to PdsW CG8844-PA, isoform A (LOC552424), mRNA]                                                                    | 3.48E-01 | -1.07 | 0.05  |  |
| GB13791-RA [PREDICTED: Apis mellifera similar to CG31954-PA (LOC413645), mRNA]                                                                                   | 3.53E-01 | -0.46 | -0.83 |  |
| GB17499-RA [Apis mellifera ADP/ATP translocase (Ant), mRNA]                                                                                                      | 3.55E-01 | -0.67 | -0.17 |  |
| GB11840-RA [PREDICTED: Apis mellifera similar to Vha100-2 CG18617-PB, isoform B, transcript variant 1 (LOC412810), mRNA]                                         | 3.56E-01 | -0.46 | -0.42 |  |
| GB17630-RA [PREDICTED: Apis mellifera similar to Mitochondrial import inner membrane translocase subunit Tim13 (LOC725705), mRNA]                                | 3.57E-01 | 0.45  | 0.45  |  |
| GB13596-RA [PREDICTED: Apis mellifera similar to ATP synthase- CG11154-PA, isoform A (LOC551766), mRNA]                                                          | 3.59E-01 | -0.26 | 0.48  |  |
| GB18874-RA [PREDICTED: Apis mellifera similar to CG1458-PA (LOC410636), mRNA]                                                                                    | 3.61E-01 | 0.06  | 0.40  |  |
| GB10796-RA [PREDICTED: Apis mellifera similar to 26S proteasome non-ATPase regulatory subunit 8 (26S proteasome regulatory subunit S14) (p31) (LOC552838), mRNA] | 3.65E-01 | 0.25  | 0.16  |  |
| GB10107-RA [PREDICTED: Apis mellifera similar to CG6459-PA (LOC413762), mRNA]                                                                                    | 3.75E-01 | 0.32  | 0.35  |  |
| GB16844-RA [Apis mellifera elongation factor 1-alpha (EF1-alpha), mRNA]                                                                                          | 3.75E-01 | -0.15 | 0.10  |  |
| GB10133-RA [PREDICTED: Apis mellifera CuZn superoxide dismutase, transcript variant 1                                                                            | 3.76E-01 | 0.29  | 0.03  |  |

|                                                                                                                                                                                     |          |       |       |
|-------------------------------------------------------------------------------------------------------------------------------------------------------------------------------------|----------|-------|-------|
| (Sod1), mRNA]                                                                                                                                                                       |          |       |       |
| GB13427-RA [PREDICTED: Apis mellifera similar to CG17337-PA, transcript variant 1 (LOC412393), mRNA]                                                                                | 3.76E-01 | -0.21 | 0.33  |
| GB10294-RA [PREDICTED: Apis mellifera similar to CG5731-PA (LOC725899), mRNA]                                                                                                       | 3.76E-01 | 0.48  | -0.20 |
| GB10294-RA [PREDICTED: Apis mellifera similar to CG5731-PA (LOC725899), mRNA]                                                                                                       | 3.76E-01 | 0.48  | -0.24 |
| GB10294-RA [PREDICTED: Apis mellifera similar to CG5731-PA (LOC725899), mRNA]                                                                                                       | 3.76E-01 | 0.48  | -0.20 |
| GB10294-RA [PREDICTED: Apis mellifera similar to CG5731-PA (LOC725899), mRNA]                                                                                                       | 3.76E-01 | 0.48  | -0.24 |
| GB12573-RA [PREDICTED: Apis mellifera similar to lethal (1) G0030 CG3861-PA, isoform A (LOC410059), mRNA]                                                                           | 3.81E-01 | -0.37 | 0.12  |
| GB12614-RA [PREDICTED: Apis mellifera similar to Actin-87E, transcript variant 2 (LOC410075), mRNA]                                                                                 | 3.81E-01 | 0.83  | -0.07 |
| GB10675-RA [PREDICTED: Apis mellifera similar to ADP ribosylation factor 79F CG8385-PB, isoform B, transcript variant 1 (LOC409481), mRNA]                                          | 3.82E-01 | 0.09  | 0.19  |
| GB13229-RA [PREDICTED: Apis mellifera similar to CG30084-PC, isoform C (LOC410204), mRNA]                                                                                           | 3.84E-01 | -0.32 | -0.28 |
| GB12586-RA [PREDICTED: Apis mellifera similar to Protein disulfide-isomerase precursor (PDI) (LOC551435), partial mRNA]                                                             | 3.84E-01 | 0.58  | 0.78  |
| GB11177-RA [PREDICTED: Apis mellifera similar to Probable elongation factor 1-delta (EF-1-delta) (LOC409015), mRNA]                                                                 | 3.84E-01 | 0.09  | 0.38  |
| GB16464-RA [PREDICTED: Apis mellifera similar to mitochondrial malate dehydrogenase precursor, transcript variant 1 (LOC408950), mRNA]                                              | 3.85E-01 | 0.14  | NA    |
| GB15582-RA [PREDICTED: Apis mellifera similar to 14-3-3 CG31196-PC, isoform C, transcript variant 1 (LOC408951), mRNA]                                                              | 3.90E-01 | -0.19 | -0.07 |
| GB18004-RA [PREDICTED: Apis mellifera similar to CG31075-PA (LOC408559), mRNA]                                                                                                      | 3.95E-01 | 0.34  | 0.66  |
| GB13882-RA [PREDICTED: Apis mellifera similar to Ecdysone-inducible gene L3 CG10160-PA (LOC411188), mRNA]                                                                           | 3.97E-01 | 0.22  | 0.02  |
| GB17793-RA [PREDICTED: Apis mellifera similar to Probable cytochrome P450 9f2 (CYP1XF2) (LOC408452), mRNA]                                                                          | 3.98E-01 | -0.79 | 0.20  |
| GB19171-RA [PREDICTED: Apis mellifera similar to Vacuolar H <sup>+</sup> -ATPase 55kD B subunit CG17369-PB, isoform B (LOC551721), mRNA]                                            | 4.00E-01 | -0.32 | 0.39  |
| GB19048-RA [PREDICTED: Apis mellifera similar to CG16935-PA (LOC411662), mRNA]                                                                                                      | 4.01E-01 | 0.11  | 0.55  |
| GB11461-RA [PREDICTED: Apis mellifera similar to UGP CG4347-PA, isoform A, transcript variant 1 (LOC412069), mRNA]                                                                  | 4.04E-01 | 0.06  | 0.59  |
| GB12860-RA [PREDICTED: Apis mellifera similar to Tudor-SN CG7008-PA (LOC552259), mRNA]                                                                                              | 4.07E-01 | -0.28 | 0.33  |
| GB19207-RA [PREDICTED: Apis mellifera hypothetical LOC408695 (LOC408695), mRNA]                                                                                                     | 4.08E-01 | -0.24 | -0.40 |
| GB13602-RA                                                                                                                                                                          | 4.12E-01 | 0.77  | -0.10 |
| GB10498-RA [PREDICTED: Apis mellifera similar to Peroxiredoxin 2540 CG11765-PA (LOC551975), mRNA]                                                                                   | 4.13E-01 | 0.58  | 0.68  |
| GB19503-RA [PREDICTED: Apis mellifera similar to heat shock protein 8, transcript variant 1 (LOC410620), mRNA]                                                                      | 4.15E-01 | 0.20  | -0.06 |
| GB19797-RA [PREDICTED: Apis mellifera similar to Cytochrome P450 6a2 (CYPVIA2) (P450-B1) (LOC724211), mRNA]                                                                         | 4.15E-01 | 0.21  | -0.34 |
| GB16965-RA [PREDICTED: Apis mellifera similar to CG7217-PB, isoform B (LOC552429), mRNA]                                                                                            | 4.15E-01 | 0.43  | 0.05  |
| GB11217-RA [PREDICTED: Apis mellifera similar to CG31974-PA (LOC724536), mRNA]                                                                                                      | 4.17E-01 | -0.35 | -0.59 |
| GB17084-RA [PREDICTED: Apis mellifera similar to Fasciclin-3 precursor (Fasciclin III) (FAS III) (LOC724243), mRNA]                                                                 | 4.18E-01 | -0.58 | -0.21 |
| GB17549-RA [PREDICTED: Apis mellifera similar to Putative Achaete Scute Target 1 CG6148-PB, isoform B (LOC413012), mRNA]                                                            | 4.21E-01 | -0.14 | 0.00  |
| GB19193-RA [PREDICTED: Apis mellifera similar to Protein translation factor SUI1 homolog (LOC409076), mRNA]                                                                         | 4.22E-01 | -0.13 | 0.02  |
| GB11227-RA [PREDICTED: Apis mellifera similar to Ribosomal protein S27A CG5271-PA (LOC413884), mRNA]                                                                                | 4.28E-01 | -0.74 | -0.03 |
| GB17108-RA [PREDICTED: Apis mellifera similar to 60S acidic ribosomal protein P2 (Acidic ribosomal protein RPA1) (LOC725884), mRNA]                                                 | 4.28E-01 | -0.08 | -0.19 |
| GB12747-RA [PREDICTED: Apis mellifera similar to eIF3-S8 CG4954-PA (LOC551184), mRNA]                                                                                               | 4.35E-01 | 0.25  | -0.08 |
| GB10060-RA [PREDICTED: Apis mellifera similar to ARMET-like protein precursor (LOC552645), mRNA]                                                                                    | 4.36E-01 | -0.16 | -0.23 |
| GB19606-RA [PREDICTED: Apis mellifera similar to Muscle LIM protein at 84B CG1019-PA, isoform A, transcript variant 1 (LOC411285), mRNA]                                            | 4.37E-01 | -0.32 | -0.28 |
| GB17255-RA [PREDICTED: Apis mellifera similar to lethal (1) G0230 CG2968-PA (LOC552682), mRNA]                                                                                      | 4.38E-01 | -0.22 | 0.14  |
| GB18300-RA [PREDICTED: Apis mellifera similar to yellow-h CG1629-PA (LOC724293), mRNA]                                                                                              | 4.38E-01 | -0.27 | 0.55  |
| GB12913-RA [PREDICTED: Apis mellifera similar to Vacuolar ATP synthase subunit E (V-ATPase E subunit) (Vacuolar proton pump E subunit) (V-ATPase 28 kDa subunit) (LOC552720), mRNA] | 4.40E-01 | -0.30 | 0.07  |
| GB13368-RA [PREDICTED: Apis mellifera lambda crystallin-like protein, transcript variant 1 (Cry11), partial mRNA]                                                                   | 4.42E-01 | 0.47  | 1.18  |
| GB15605-RA [PREDICTED: Apis mellifera similar to 40S ribosomal protein S12 (LOC552266), mRNA]                                                                                       | 4.43E-01 | -0.63 | -0.12 |
| GB13559-RA [PREDICTED: Apis mellifera similar to CG7460-PB, transcript variant 1 (LOC413478), mRNA]                                                                                 | 4.46E-01 | -0.21 | 0.50  |
| GB18172-RA [PREDICTED: Apis mellifera similar to CG18143-PA (LOC727293), mRNA]                                                                                                      | 4.47E-01 | -0.05 | 1.17  |
| GB19422-RA [PREDICTED: Apis mellifera similar to lethal (1) G0156 CG12233-PA, isoform                                                                                               | 4.47E-01 | 0.21  | 0.31  |

|                                                                                                                                                                                                                                                                  |          |       |       |
|------------------------------------------------------------------------------------------------------------------------------------------------------------------------------------------------------------------------------------------------------------------|----------|-------|-------|
| A (LOC409292), mRNA]                                                                                                                                                                                                                                             |          |       |       |
| GB19093-RA [PREDICTED: Apis mellifera similar to Guanine nucleotide-binding protein G(o) subunit alpha 47A (LOC726858), partial mRNA]                                                                                                                            | 4.54E-01 | -0.31 | 0.30  |
| GB17641-RA [PREDICTED: Apis mellifera similar to CG1640-PA, isoform A, transcript variant 1 (LOC409196), mRNA]                                                                                                                                                   | 4.63E-01 | 0.04  | 0.56  |
| GB18683-RA [PREDICTED: Apis mellifera similar to Annexin-B9 (Annexin-9) (Annexin IX) (LOC412487), partial mRNA]                                                                                                                                                  | 4.64E-01 | 0.29  | 0.60  |
| GB16429-RA [PREDICTED: Apis mellifera similar to Glucose-6-phosphate isomerase (GPI) (Phosphoglucose isomerase) (PGI) (Phosphohexose isomerase) (PHI) (LOC551154), mRNA]                                                                                         | 4.70E-01 | 0.13  | 0.17  |
| GB10590-RA [PREDICTED: Apis mellifera similar to vibrator CG5269-PA (LOC552183), mRNA]                                                                                                                                                                           | 4.74E-01 | -0.70 | 0.35  |
| GB19777-RA [PREDICTED: Apis mellifera similar to Proteasome subunit beta type 4 precursor (Proteasome beta chain) (Macropain beta chain) (Multicatalytic endopeptidase complex beta chain) (Proteasome chain 3) (LOC411520), mRNA]                               | 4.81E-01 | 0.27  | 0.38  |
| GB17736-RA [PREDICTED: Apis mellifera similar to Protein disulfide-isomerase precursor (PDI) (LOC726142), partial mRNA]                                                                                                                                          | 4.89E-01 | 0.56  | 0.40  |
| GB15226-RA [PREDICTED: Apis mellifera similar to Vacuolar ATP synthase subunit D 1 (V-ATPase D subunit 1) (Vacuolar proton pump D subunit 1) (dV-ATPase D), transcript variant 1 (LOC411295), mRNA]                                                              | 4.89E-01 | -0.27 | 0.20  |
| GB15457-RA [PREDICTED: Apis mellifera similar to Thioredoxin-like CG5495-PA, transcript variant 1 (LOC550734), mRNA]                                                                                                                                             | 4.92E-01 | 0.39  | 0.11  |
| GB14321-RA [PREDICTED: Apis mellifera similar to ATP synthase B chain, mitochondrial precursor (FO-ATP synthase subunit B) (LOC551923), mRNA]                                                                                                                    | 4.96E-01 | -0.20 | 0.42  |
| GB18760-RA [PREDICTED: Apis mellifera similar to L-xylulose reductase (XR) (Dicarbonyl/L-xylulose reductase) (LOC413567), mRNA]                                                                                                                                  | 4.97E-01 | 0.29  | 0.56  |
| GB10989-RA [PREDICTED: Apis mellifera similar to Vacuolar ATP synthase catalytic subunit A, osteoclast isoform (V-ATPase subunit A 2) (Vacuolar proton pump alpha subunit 2) (V-ATPase 69 kDa subunit 2) (Isoform HO68), transcript variant 1 (LOC551093), mRNA] | 4.99E-01 | -0.16 | 0.06  |
| GB16245-RA [PREDICTED: Apis mellifera similar to CG9342-PA (LOC551250), mRNA]                                                                                                                                                                                    | 5.01E-01 | 0.21  | 0.45  |
| GB10477-RA [PREDICTED: Apis mellifera similar to B-cell receptor-associated protein 37 (LOC551944), mRNA]                                                                                                                                                        | 5.05E-01 | -0.35 | 0.16  |
| GB12510-RA [PREDICTED: Apis mellifera similar to CG4769-PA (LOC413605), mRNA]                                                                                                                                                                                    | 5.08E-01 | -0.36 | 0.15  |
| GB16028-RA [PREDICTED: Apis mellifera similar to CG9674-PA, isoform A, transcript variant 1 (LOC413372), mRNA]                                                                                                                                                   | 5.08E-01 | 0.55  | 0.01  |
| GB18917-RA [PREDICTED: Apis mellifera similar to Cofilin/actin-depolymerizing factor homolog (Protein D61) (Protein twinstar) (LOC725718), mRNA]                                                                                                                 | 5.11E-01 | 0.28  | 0.01  |
| GB11282-RA [PREDICTED: Apis mellifera similar to Moesin CG10701-PD, isoform D (LOC412799), mRNA]                                                                                                                                                                 | 5.13E-01 | -0.39 | 0.05  |
| GB17380-RA [PREDICTED: Apis mellifera similar to failed axon connections CG4609-PA, isoform A, transcript variant 1 (LOC409643), mRNA]                                                                                                                           | 5.13E-01 | -0.41 | 0.12  |
| GB18415-RA [PREDICTED: Apis mellifera similar to CG5065-PA (LOC411910), mRNA]                                                                                                                                                                                    | 5.14E-01 | 0.40  | 0.68  |
| GB14059-RA [PREDICTED: Apis mellifera similar to Nucleosome assembly protein 1-like 1 (NAP-1-related protein) (hNRP), transcript variant 1 (LOC550824), mRNA]                                                                                                    | 5.31E-01 | -0.10 | 0.00  |
| GB10836-RA [PREDICTED: Apis mellifera similar to Hsc70Cb CG6603-PA, isoform A, transcript variant 1 (LOC408706), mRNA]                                                                                                                                           | 5.35E-01 | 0.14  | 0.02  |
| GB17251-RA [PREDICTED: Apis mellifera similar to Nucleoside diphosphate kinase (NDK) (NDP kinase) (Abnormal wing disks protein) (Killer of prune protein) (LOC409861), mRNA]                                                                                     | 5.36E-01 | 0.32  | 0.23  |
| GB10382-RA [PREDICTED: Apis mellifera similar to lethal (1) G0022 CG8231-PA (LOC551295), partial mRNA]                                                                                                                                                           | 5.40E-01 | -0.10 | 0.28  |
| GB15291-RA [PREDICTED: Apis mellifera similar to ATP synthase gamma chain, mitochondrial precursor (LOC552699), mRNA]                                                                                                                                            | 5.43E-01 | -0.53 | 0.31  |
| GB16959-RA [PREDICTED: Apis mellifera similar to Glutathione S transferase S1 CG8938-PA, isoform A (LOC552304), mRNA]                                                                                                                                            | 5.50E-01 | 0.61  | 0.39  |
| GB11251-RA [PREDICTED: Apis mellifera similar to CG3902-PA (LOC409712), mRNA]                                                                                                                                                                                    | 5.52E-01 | 0.28  | 1.67  |
| GB10275-RA [PREDICTED: Apis mellifera similar to -Tubulin at 56D CG9277-PB, isoform B (LOC408782), mRNA]                                                                                                                                                         | 5.55E-01 | 0.25  | 0.32  |
| GB13821-RA [PREDICTED: Apis mellifera similar to CG3609-PA (LOC412231), mRNA]                                                                                                                                                                                    | 5.56E-01 | 0.05  | 0.07  |
| GB16568-RA [PREDICTED: Apis mellifera similar to CG11015-PA (LOC552610), mRNA]                                                                                                                                                                                   | 5.58E-01 | -0.12 | 0.27  |
| GB10717-RA [PREDICTED: Apis mellifera similar to Muscle protein 20 CG4696-PA, isoform A (LOC408972), mRNA]                                                                                                                                                       | 5.61E-01 | -0.25 | -0.76 |
| GB16525-RA [PREDICTED: Apis mellifera similar to proteasome (prosome, macropain) 26S subunit, non-ATPase, 10 (LOC551954), mRNA]                                                                                                                                  | 5.63E-01 | -0.22 | 0.20  |
| GB12951-RA [PREDICTED: Apis mellifera similar to 14-3-3 CG17870-PC, isoform C, transcript variant 1 (LOC408289), mRNA]                                                                                                                                           | 5.66E-01 | 0.24  | 0.02  |
| GB12951-RA [PREDICTED: Apis mellifera similar to 14-3-3 CG17870-PC, isoform C, transcript variant 1 (LOC408289), mRNA]                                                                                                                                           | 5.66E-01 | 0.24  | 0.05  |
| GB12951-RA [PREDICTED: Apis mellifera similar to 14-3-3 CG17870-PC, isoform C, transcript variant 1 (LOC408289), mRNA]                                                                                                                                           | 5.66E-01 | 0.24  | 0.00  |
| GB12951-RA [PREDICTED: Apis mellifera similar to 14-3-3 CG17870-PC, isoform C, transcript variant 1 (LOC408289), mRNA]                                                                                                                                           | 5.66E-01 | 0.24  | 0.02  |
| GB12951-RA [PREDICTED: Apis mellifera similar to 14-3-3 CG17870-PC, isoform C, transcript variant 1 (LOC408289), mRNA]                                                                                                                                           | 5.66E-01 | 0.24  | 0.05  |
| GB12951-RA [PREDICTED: Apis mellifera similar to 14-3-3 CG17870-PC, isoform C, transcript variant 1 (LOC408289), mRNA]                                                                                                                                           | 5.66E-01 | 0.24  | 0.00  |
| GB12951-RA [PREDICTED: Apis mellifera similar to 14-3-3 CG17870-PC, isoform C, transcript variant 1 (LOC408289), mRNA]                                                                                                                                           | 5.66E-01 | 0.24  | 0.02  |

|                                                                                                                                                                                                                                     |          |       |       |
|-------------------------------------------------------------------------------------------------------------------------------------------------------------------------------------------------------------------------------------|----------|-------|-------|
| GB12951-RA [PREDICTED: <i>Apis mellifera</i> similar to 14-3-3 CG17870-PC, isoform C, transcript variant 1 (LOC408289), mRNA]                                                                                                       | 5.66E-01 | 0.24  | 0.05  |
| GB12951-RA [PREDICTED: <i>Apis mellifera</i> similar to 14-3-3 CG17870-PC, isoform C, transcript variant 1 (LOC408289), mRNA]                                                                                                       | 5.66E-01 | 0.24  | 0.00  |
| GB14409-RA [PREDICTED: <i>Apis mellifera</i> similar to CG9119-PA (LOC411385), mRNA]                                                                                                                                                | 5.70E-01 | -0.19 | 0.61  |
| GB13595-RA [PREDICTED: <i>Apis mellifera</i> similar to CG11771-PA (LOC412154), mRNA]                                                                                                                                               | 5.72E-01 | 0.26  | -0.04 |
| GB15168-RA [PREDICTED: <i>Apis mellifera</i> similar to VAMP (vesicle-associated membrane protein)-associated protein A (LOC409934), mRNA]                                                                                          | 5.73E-01 | -0.18 | 0.07  |
| GB10282-RA [PREDICTED: <i>Apis mellifera</i> similar to Adenylate kinase-2 CG3140-PA (LOC551523), mRNA]                                                                                                                             | 5.77E-01 | -0.13 | 0.21  |
| GB15619-RA [PREDICTED: <i>Apis mellifera</i> similar to CG8036-PB, isoform B, transcript variant 1 (LOC550804), mRNA]                                                                                                               | 5.78E-01 | 0.29  | 0.65  |
| GB10598-RA [PREDICTED: <i>Apis mellifera</i> similar to CG6852-PA (LOC727309), mRNA]                                                                                                                                                | 5.79E-01 | 0.07  | 0.32  |
| GB12140-RA [PREDICTED: <i>Apis mellifera</i> similar to Ribosomal protein S18 CG8900-PA, isoform A (LOC552726), mRNA]                                                                                                               | 5.84E-01 | -0.20 | -0.21 |
| GB11503-RA [PREDICTED: <i>Apis mellifera</i> similar to CG5195-PA (LOC724779), mRNA]                                                                                                                                                | 5.92E-01 | -0.08 | 0.11  |
| GB19286-RA [PREDICTED: <i>Apis mellifera</i> similar to Rpn2 CG11888-PA (LOC409699), mRNA]                                                                                                                                          | 6.05E-01 | 0.11  | 0.37  |
| GB12840-RA [PREDICTED: <i>Apis mellifera</i> similar to squid CG16901-PC, isoform C (LOC725626), mRNA]                                                                                                                              | 6.09E-01 | -0.27 | 0.01  |
| GB14261-RA [PREDICTED: <i>Apis mellifera</i> hypothetical protein LOC724386 (LOC724386), mRNA]                                                                                                                                      | 6.11E-01 | 0.23  | 0.95  |
| GB16132-RA [PREDICTED: <i>Apis mellifera</i> similar to CG7834-PA, isoform A (LOC410308), mRNA]                                                                                                                                     | 6.13E-01 | 0.13  | 0.78  |
| GB19501-RA [PREDICTED: <i>Apis mellifera</i> similar to CG5023-PA (LOC408532), mRNA]                                                                                                                                                | 6.19E-01 | -0.22 | 0.01  |
| GB11028-RA [PREDICTED: <i>Apis mellifera</i> similar to Alpha-actinin, sarcomeric (F-actin cross linking protein) (LOC725782), mRNA]                                                                                                | 6.34E-01 | -0.09 | -0.24 |
| GB15307-RA [PREDICTED: <i>Apis mellifera</i> similar to Guanine nucleotide-binding protein subunit beta 1, transcript variant 1 (LOC410497), mRNA]                                                                                  | 6.38E-01 | -0.13 | -0.04 |
| GB13224-RA [PREDICTED: <i>Apis mellifera</i> similar to Multidrug resistance protein homolog 49 (P-glycoprotein 49) (LOC551167), mRNA]                                                                                              | 6.40E-01 | -0.39 | -0.12 |
| GB17125-RA [PREDICTED: <i>Apis mellifera</i> similar to leukotriene B4 12-hydroxydehydrogenase (LOC411378), mRNA]                                                                                                                   | 6.42E-01 | 0.17  | -0.06 |
| GB13073-RA [PREDICTED: <i>Apis mellifera</i> similar to CG5214-PA (LOC409155), mRNA]                                                                                                                                                | 6.45E-01 | -0.08 | 0.46  |
| GB19820-RA [PREDICTED: <i>Apis mellifera</i> similar to Probable cytochrome P450 9f2 (CYP1XF2) (LOC410492), mRNA]                                                                                                                   | 6.47E-01 | 0.21  | 0.10  |
| GB10827-RA [PREDICTED: <i>Apis mellifera</i> similar to Kinesin heavy chain CG7765-PA, transcript variant 1 (LOC411769), mRNA]                                                                                                      | 6.48E-01 | -0.14 | -0.06 |
| GB18313-RA [Apis mellifera prophenoloxidase (LOC406155), mRNA]                                                                                                                                                                      | 6.49E-01 | 0.04  | 0.23  |
| GB17764-RA [PREDICTED: <i>Apis mellifera</i> similar to Rab-protein 11 CG5771-PB, isoform B (LOC551603), mRNA]                                                                                                                      | 6.53E-01 | -0.05 | 0.05  |
| GB10901-RA                                                                                                                                                                                                                          | 6.53E-01 | -0.14 | -0.13 |
| GB18557-RA [PREDICTED: <i>Apis mellifera</i> similar to Spectrin alpha chain (LOC551291), mRNA]                                                                                                                                     | 6.58E-01 | -0.16 | -0.32 |
| GB14269-RA [PREDICTED: <i>Apis mellifera</i> similar to CG15117-PA, isoform A (LOC409814), mRNA]                                                                                                                                    | 6.62E-01 | 0.25  | 0.53  |
| GB10411-RA [PREDICTED: <i>Apis mellifera</i> similar to Proteasome subunit alpha type 7-1 (Proteasome 28 kDa subunit 1) (PROS-Dm28.1), transcript variant 1 (LOC410095), mRNA]                                                      | 6.71E-01 | 0.09  | -0.02 |
| GB16807-RA [PREDICTED: <i>Apis mellifera</i> similar to CG9518-PA (LOC410733), mRNA]                                                                                                                                                | 6.72E-01 | -0.21 | 0.15  |
| GB10587-RA [PREDICTED: <i>Apis mellifera</i> similar to T-complex Chaperonin 5 CG8439-PA, isoform A (LOC409825), mRNA]                                                                                                              | 6.76E-01 | -0.17 | 0.18  |
| GB13082-RA [PREDICTED: <i>Apis mellifera</i> similar to esterase D/formylglutathione hydrolase (LOC412193), mRNA]                                                                                                                   | 6.78E-01 | 0.03  | 0.40  |
| GB14607-RA [Apis mellifera short-chain dehydrogenase/reductase (LOC406147), mRNA]                                                                                                                                                   | 6.91E-01 | -0.13 | -0.68 |
| GB12949-RA [PREDICTED: <i>Apis mellifera</i> similar to 6-phosphogluconate dehydrogenase, decarboxylating (LOC552712), partial mRNA]                                                                                                | 6.98E-01 | 0.14  | 0.04  |
| GB17379-RA [PREDICTED: <i>Apis mellifera</i> similar to CG4567-PA, transcript variant 1 (LOC411351), mRNA]                                                                                                                          | 7.05E-01 | -0.01 | 0.26  |
| GB19860-RA [PREDICTED: <i>Apis mellifera</i> similar to Heat shock protein cognate 5 CG8542-PA (LOC408605), mRNA]                                                                                                                   | 7.23E-01 | 0.21  | 0.46  |
| GB15202-RA [PREDICTED: <i>Apis mellifera</i> similar to dj-1 CG1349-PA (LOC551882), mRNA]                                                                                                                                           | 7.24E-01 | -0.05 | -0.11 |
| GB15692-RA [PREDICTED: <i>Apis mellifera</i> similar to ribosomal protein S13 (LOC551867), mRNA]                                                                                                                                    | 7.32E-01 | -0.27 | 0.09  |
| GB16272-RA [PREDICTED: <i>Apis mellifera</i> similar to CG7145-PA, isoform A (LOC551113), mRNA]                                                                                                                                     | 7.34E-01 | -0.08 | 0.13  |
| GB18727-RA [PREDICTED: <i>Apis mellifera</i> similar to CG5362-PA, transcript variant 1 (LOC411014), mRNA]                                                                                                                          | 7.45E-01 | 0.12  | 0.27  |
| GB15299-RA [Apis mellifera fatty acid binding protein (Fabp), mRNA]                                                                                                                                                                 | 7.47E-01 | 0.05  | 0.00  |
| GB19429-RA [PREDICTED: <i>Apis mellifera</i> similar to CG17838-PE, isoform E (LOC408775), mRNA]                                                                                                                                    | 7.49E-01 | 0.03  | 0.19  |
| GB19003-RA [PREDICTED: <i>Apis mellifera</i> similar to Proteasome subunit beta type 3 (Proteasome theta chain) (Proteasome chain 13) (Proteasome component C10-II) (LOC552579), mRNA]                                              | 7.55E-01 | 0.15  | 0.27  |
| GB11284-RA [PREDICTED: <i>Apis mellifera</i> similar to Proteasome subunit alpha type 1 (Proteasome component C2) (Macropain subunit C2) (Multicatalytic endopeptidase complex subunit C2) (Proteasome nu chain) (LOC552654), mRNA] | 7.58E-01 | -0.06 | 0.09  |

|                                                                                                                                                                                                                                                                        |          |       |       |
|------------------------------------------------------------------------------------------------------------------------------------------------------------------------------------------------------------------------------------------------------------------------|----------|-------|-------|
| GB14499-RA [PREDICTED: <i>Apis mellifera</i> similar to CG33105-PA (LOC412554), mRNA]                                                                                                                                                                                  | 7.69E-01 | -0.23 | -0.15 |
| GB16485-RA [PREDICTED: <i>Apis mellifera</i> similar to ATP synthase D chain, mitochondrial (LOC410557), mRNA]                                                                                                                                                         | 7.83E-01 | -0.10 | 0.07  |
| GB15044-RA [PREDICTED: <i>Apis mellifera</i> similar to CG6180-PA, transcript variant 1 (LOC408516), mRNA]                                                                                                                                                             | 7.83E-01 | 0.06  | 0.30  |
| GB20117-RA [PREDICTED: <i>Apis mellifera</i> hypothetical LOC552391 (LOC552391), mRNA]                                                                                                                                                                                 | 8.01E-01 | 0.23  | 0.99  |
| GB14603-RA [PREDICTED: <i>Apis mellifera</i> similar to CG7142-PA (LOC726372), mRNA]                                                                                                                                                                                   | 8.02E-01 | -0.18 | -0.08 |
| GB10614-RA [PREDICTED: <i>Apis mellifera</i> similar to Sc2 CG10849-PA (LOC725146), mRNA]                                                                                                                                                                              | 8.14E-01 | -0.16 | 0.01  |
| GB14758-RA [PREDICTED: <i>Apis mellifera</i> similar to heat shock protein 90-alpha, transcript variant 1 (LOC408928), mRNA]                                                                                                                                           | 8.16E-01 | -0.07 | 0.66  |
| GB14012-RA [PREDICTED: <i>Apis mellifera</i> similar to CG9090-PA, transcript variant 1 (LOC413517), mRNA]                                                                                                                                                             | 8.19E-01 | -0.03 | 0.01  |
| GB10939-RA [PREDICTED: <i>Apis mellifera</i> similar to Tropomyosin 2 CG4843-PB, isoform B (LOC408414), mRNA]                                                                                                                                                          | 8.21E-01 | -0.18 | -0.06 |
| GB10514-RA [PREDICTED: <i>Apis mellifera</i> similar to Tubulin alpha-1 chain (LOC408388), mRNA]                                                                                                                                                                       | 8.27E-01 | 0.09  | 0.02  |
| GB13236-RA [PREDICTED: <i>Apis mellifera</i> similar to CG5958-PA (LOC552447), mRNA]                                                                                                                                                                                   | 8.33E-01 | -0.03 | -0.21 |
| GB10576-RA [PREDICTED: <i>Apis mellifera</i> similar to CG33519-PB, transcript variant 1 (LOC408830), mRNA]                                                                                                                                                            | 8.34E-01 | -0.05 | -0.38 |
| GB19359-RA [PREDICTED: <i>Apis mellifera</i> similar to Clathrin heavy chain CG9012-PA, isoform A, transcript variant 1 (LOC550716), mRNA]                                                                                                                             | 8.35E-01 | -0.05 | 0.01  |
| GB16412-RA [PREDICTED: <i>Apis mellifera</i> similar to Translationally controlled tumor protein CG4800-PA, transcript variant 1 (LOC411832), mRNA]                                                                                                                    | 8.37E-01 | -0.10 | -0.24 |
| GB10584-RA [PREDICTED: <i>Apis mellifera</i> similar to glucocerebrosidase precursor, transcript variant 2 (LOC409708), mRNA]                                                                                                                                          | 8.38E-01 | -0.45 | -0.03 |
| GB19425-RA [PREDICTED: <i>Apis mellifera</i> similar to Hsp70/Hsp90 organizing protein homolog CG2720-PA, transcript variant 1 (LOC411002), mRNA]                                                                                                                      | 8.41E-01 | -0.08 | 0.29  |
| GB18204-RA [PREDICTED: <i>Apis mellifera</i> similar to CG8839-PA, isoform A (LOC727034), partial mRNA]                                                                                                                                                                | 8.56E-01 | 0.07  | 0.30  |
| GB12721-RA [PREDICTED: <i>Apis mellifera</i> similar to Pterin-4-alpha-carbinolamine dehydratase 2 (PHS 2) (4-alpha-hydroxy-tetrahydropterin dehydratase 2) (DcoH-like protein DCoHm) (Dimerization cofactor of hepatocyte nuclear factor 1 from muscle) (HNF1-alpha d | 8.64E-01 | -0.05 | 0.37  |
| GB11412-RA [PREDICTED: <i>Apis mellifera</i> similar to CG1443-PA, transcript variant 1 (LOC411983), mRNA]                                                                                                                                                             | 8.66E-01 | 0.14  | -1.34 |
| GB10390-RA [PREDICTED: <i>Apis mellifera</i> similar to Proteasome 25kD subunit CG5266-PA (LOC409802), mRNA]                                                                                                                                                           | 8.71E-01 | -0.04 | -0.02 |
| GB15039-RA [PREDICTED: <i>Apis mellifera</i> similar to Enolase CG17654-PA, isoform A (LOC552678), partial mRNA]                                                                                                                                                       | 8.72E-01 | 0.02  | -0.41 |
| GB15030-RA [PREDICTED: <i>Apis mellifera</i> similar to -Esterase-7 CG1112-PA, isoform A (LOC726134), mRNA]                                                                                                                                                            | 8.73E-01 | 0.06  | 0.84  |
| GB15079-RA [PREDICTED: <i>Apis mellifera</i> similar to Glutamate dehydrogenase CG5320-PF, isoform F, transcript variant 1 (LOC409253), mRNA]                                                                                                                          | 8.75E-01 | -0.10 | 0.38  |
| GB19923-RA [PREDICTED: <i>Apis mellifera</i> similar to Cathepsin L precursor (Cysteine proteinase 1) (LOC552756), mRNA]                                                                                                                                               | 8.79E-01 | -0.05 | 0.21  |
| GB13033-RA [PREDICTED: <i>Apis mellifera</i> similar to CG8258-PA (LOC551436), mRNA]                                                                                                                                                                                   | 8.86E-01 | 0.02  | 0.16  |
| GB10441-RA [PREDICTED: <i>Apis mellifera</i> similar to CG14516-PA, isoform A (LOC551180), partial mRNA]                                                                                                                                                               | 9.11E-01 | -0.03 | -0.77 |
| GB10855-RA [PREDICTED: <i>Apis mellifera</i> similar to plasma glutamate carboxypeptidase, transcript variant 1 (LOC410149), mRNA]                                                                                                                                     | 9.12E-01 | -0.07 | -0.03 |
| GB10467-RA [PREDICTED: <i>Apis mellifera</i> similar to aspartate aminotransferase 2 precursor, transcript variant 1 (LOC412675), mRNA]                                                                                                                                | 9.13E-01 | 0.06  | 0.28  |
| GB20101-RA [PREDICTED: <i>Apis mellifera</i> similar to CG4893-PA, transcript variant 1 (LOC411570), mRNA]                                                                                                                                                             | 9.27E-01 | -0.05 | 0.41  |
| GB15718-RA [PREDICTED: <i>Apis mellifera</i> similar to CG14207-PB, isoform B, transcript variant 1 (LOC408875), mRNA]                                                                                                                                                 | 9.28E-01 | -0.04 | 0.44  |
| GB16189-RA [PREDICTED: <i>Apis mellifera</i> similar to 26S proteasome non-ATPase regulatory subunit 4 (26S proteasome regulatory subunit S5A) (Multiubiquitin chain-binding protein) (54 kDa subunit of mu particle) (p54) (LOC409609), mRNA]                         | 9.35E-01 | 0.07  | -0.13 |
| GB19811-RA [Apis mellifera take-out-like carrier protein (JHBP-1), mRNA]                                                                                                                                                                                               | 9.37E-01 | -0.04 | 0.97  |
| GB18764-RA [PREDICTED: <i>Apis mellifera</i> similar to translation elongation factor 1-gamma, transcript variant 2 (LOC551211), mRNA]                                                                                                                                 | 9.39E-01 | 0.02  | -0.01 |
| GB13536-RA [PREDICTED: <i>Apis mellifera</i> similar to CG11963-PA (LOC551958), mRNA]                                                                                                                                                                                  | 9.43E-01 | -0.02 | 0.08  |
| GB17439-RA [PREDICTED: <i>Apis mellifera</i> similar to succinate dehydrogenase complex, subunit A, flavoprotein (Fp), transcript variant 1 (LOC550667), mRNA]                                                                                                         | 9.49E-01 | -0.01 | 0.27  |
| GB15989-RA [PREDICTED: <i>Apis mellifera</i> similar to downstream of receptor kinase CG6033-PA, isoform A (LOC550857), mRNA]                                                                                                                                          | 9.51E-01 | 0.02  | 0.18  |
| GB19846-RA [PREDICTED: <i>Apis mellifera</i> similar to CG5255-PA (LOC410894), mRNA]                                                                                                                                                                                   | 9.55E-01 | 0.04  | -1.34 |
| GB12122-RA [PREDICTED: <i>Apis mellifera</i> similar to CG11333-PA (LOC410420), mRNA]                                                                                                                                                                                  | 9.57E-01 | 0.01  | 0.70  |
| GB20070-RA [Apis mellifera alpha-glucosidase (Hbg2), mRNA]                                                                                                                                                                                                             | 9.57E-01 | 0.01  | 0.09  |
| GB12607-RA [Apis mellifera alpha-glucosidase (Hbg1), mRNA]                                                                                                                                                                                                             | 9.69E-01 | 0.01  | -1.31 |
| GB14191-RA [PREDICTED: <i>Apis mellifera</i> similar to Proteasome subunit beta type 1 (Proteasome 26 kDa subunit) (LOC411695), mRNA]                                                                                                                                  | 9.71E-01 | -0.01 | 0.09  |
| GB19745-RA [Apis mellifera transferrin (Trf), mRNA]                                                                                                                                                                                                                    | 9.83E-01 | 0.01  | 0.59  |
| GB19444-RA [PREDICTED: <i>Apis mellifera</i> similar to NADPH--cytochrome P450 reductase (CPR) (P450R) (LOC724870), mRNA]                                                                                                                                              | 9.84E-01 | 0.00  | 0.38  |

|                                                                                                                                           |          |      |       |
|-------------------------------------------------------------------------------------------------------------------------------------------|----------|------|-------|
| GB10176-RA [PREDICTED: Apis mellifera hypothetical LOC552071 (LOC552071), mRNA]                                                           | 9.85E-01 | 0.01 | 0.24  |
| GB20037-RA [PREDICTED: Apis mellifera similar to CG4666-PA (LOC552211), mRNA]                                                             | 9.85E-01 | 0.01 | -0.08 |
| GB18844-RA [PREDICTED: Apis mellifera similar to Glutamate oxaloacetate transaminase<br>1 CG8430-PA, isoform A (LOC726943), partial mRNA] | 9.87E-01 | 0.01 | 0.74  |
| GB11587-RA [PREDICTED: Apis mellifera similar to proteasome (prosome, macropain) 26S<br>subunit, non-ATPase, 2 (LOC409475), mRNA]         | 9.89E-01 | 0.00 | -0.03 |
| GB10561-RA [PREDICTED: Apis mellifera similar to CG8351-PA, transcript variant 1<br>(LOC550694), mRNA]                                    | 9.93E-01 | 0.00 | 0.31  |
| GB12420-RA [PREDICTED: Apis mellifera similar to CG1129-PA, isoform A (LOC409329),<br>mRNA]                                               | 9.93E-01 | 0.00 | 0.42  |
| GB14642-RA [PREDICTED: Apis mellifera similar to sallimus CG1915-PC, isoform C<br>(LOC551181), mRNA]                                      | 9.96E-01 | 0.00 | -0.41 |

Table S8. Gene Ontology terms with a directional bias toward *vg* RNAi (V)>control (C)

| Term                                                                             | P-value  | Category V>C | Category C>V | Total V>C | Total C>V |
|----------------------------------------------------------------------------------|----------|--------------|--------------|-----------|-----------|
| GO:0019538~protein metabolic process                                             | 4.16E-06 | 125          | 91           | 336       | 418       |
| GO:0044267~cellular protein metabolic process                                    | 3.05E-05 | 116          | 87           | 336       | 418       |
| GO:0043170~macromolecule metabolic process                                       | 3.35E-05 | 185          | 167          | 336       | 418       |
| GO:0044260~cellular macromolecule metabolic process                              | 7.65E-05 | 118          | 92           | 336       | 418       |
| GO:0016043~cellular component organization and biogenesis                        | 9.20E-04 | 112          | 94           | 336       | 418       |
| GO:0033036~macromolecule localization                                            | 1.98E-03 | 43           | 25           | 336       | 418       |
| GO:0022607~cellular component assembly                                           | 2.07E-03 | 34           | 17           | 336       | 418       |
| GO:0043283~biopolymer metabolic process                                          | 2.17E-03 | 100          | 84           | 336       | 418       |
| GO:0010467~gene expression                                                       | 2.29E-03 | 87           | 70           | 336       | 418       |
| GO:0008104~protein localization                                                  | 2.74E-03 | 40           | 23           | 336       | 418       |
| GO:0006911~phagocytosis, engulfment                                              | 3.55E-03 | 22           | 8            | 336       | 418       |
| GO:0065003~macromolecular complex assembly                                       | 5.81E-03 | 27           | 13           | 336       | 418       |
| GO:0045184~establishment of protein localization                                 | 8.13E-03 | 35           | 21           | 336       | 418       |
| GO:0009987~cellular process                                                      | 8.61E-03 | 297          | 342          | 336       | 418       |
| GO:0016070~RNA metabolic process                                                 | 8.95E-03 | 51           | 37           | 336       | 418       |
| GO:0006909~phagocytosis                                                          | 1.13E-02 | 22           | 10           | 336       | 418       |
| GO:0015031~protein transport                                                     | 1.17E-02 | 34           | 21           | 336       | 418       |
| GO:0046907~intracellular transport                                               | 1.23E-02 | 38           | 25           | 336       | 418       |
| GO:0006996~organelle organization and biogenesis                                 | 1.60E-02 | 51           | 39           | 336       | 418       |
| GO:0016311~dephosphorylation                                                     | 1.63E-02 | 8            | 0            | 336       | 418       |
| GO:0006508~proteolysis                                                           | 1.64E-02 | 32           | 20           | 336       | 418       |
| GO:0009059~macromolecule biosynthetic process                                    | 1.68E-02 | 46           | 34           | 336       | 418       |
| GO:0022618~protein-RNA complex assembly                                          | 1.76E-02 | 11           | 2            | 336       | 418       |
| GO:0006413~translational initiation                                              | 1.76E-02 | 11           | 2            | 336       | 418       |
| GO:0007292~female gamete generation                                              | 1.93E-02 | 23           | 12           | 336       | 418       |
| GO:0048477~oogenesis                                                             | 1.93E-02 | 23           | 12           | 336       | 418       |
| GO:0006886~intracellular protein transport                                       | 2.30E-02 | 30           | 19           | 336       | 418       |
| GO:0006605~protein targeting                                                     | 2.65E-02 | 20           | 10           | 336       | 418       |
| GO:0051641~cellular localization                                                 | 3.02E-02 | 43           | 33           | 336       | 418       |
| GO:0006412~translation                                                           | 3.05E-02 | 42           | 32           | 336       | 418       |
| GO:0044237~cellular metabolic process                                            | 3.09E-02 | 227          | 253          | 336       | 418       |
| GO:0065007~biological regulation                                                 | 3.21E-02 | 89           | 84           | 336       | 418       |
| GO:0019953~sexual reproduction                                                   | 3.23E-02 | 29           | 19           | 336       | 418       |
| GO:0010324~membrane invagination                                                 | 3.23E-02 | 29           | 19           | 336       | 418       |
| GO:0006897~endocytosis                                                           | 3.23E-02 | 29           | 19           | 336       | 418       |
| GO:0007276~gamete generation                                                     | 3.23E-02 | 29           | 19           | 336       | 418       |
| GO:0000003~reproduction                                                          | 3.25E-02 | 33           | 23           | 336       | 418       |
| GO:0016044~membrane organization and biogenesis                                  | 3.25E-02 | 32           | 22           | 336       | 418       |
| GO:0051704~multi-organism process                                                | 4.24E-02 | 12           | 4            | 336       | 418       |
| GO:0022403~cell cycle phase                                                      | 4.65E-02 | 13           | 5            | 336       | 418       |
| GO:0022613~ribonucleoprotein complex biogenesis and assembly                     | 4.99E-02 | 14           | 6            | 336       | 418       |
| GO:0051649~establishment of cellular localization                                | 5.18E-02 | 41           | 33           | 336       | 418       |
| GO:0048592~eye morphogenesis                                                     | 5.27E-02 | 15           | 7            | 336       | 418       |
| GO:0016192~vesicle-mediated transport                                            | 5.42E-02 | 38           | 30           | 336       | 418       |
| GO:0006366~transcription from RNA polymerase II promoter                         | 5.68E-02 | 17           | 9            | 336       | 418       |
| GO:0007389~pattern specification process                                         | 6.02E-02 | 20           | 12           | 336       | 418       |
| GO:0006470~protein amino acid dephosphorylation                                  | 6.46E-02 | 6            | 0            | 336       | 418       |
| GO:0050789~regulation of biological process                                      | 6.77E-02 | 80           | 78           | 336       | 418       |
| GO:0000279~M phase                                                               | 7.32E-02 | 12           | 5            | 336       | 418       |
| GO:0006457~protein folding                                                       | 7.94E-02 | 14           | 7            | 336       | 418       |
| GO:0001745~compound eye morphogenesis                                            | 7.94E-02 | 14           | 7            | 336       | 418       |
| GO:0048468~cell development                                                      | 8.01E-02 | 42           | 36           | 336       | 418       |
| GO:0051276~chromosome organization and biogenesis                                | 8.29E-02 | 16           | 9            | 336       | 418       |
| GO:0006139~nucleobase, nucleoside, nucleotide and nucleic acid metabolic process | 8.97E-02 | 75           | 74           | 336       | 418       |
| GO:0044238~primary metabolic process                                             | 9.27E-02 | 216          | 247          | 336       | 418       |



Table S9. Gene Ontology terms with directional bias toward control (C)&gt;vg RNAi (V)

| Term                                                      | P-value  | Category<br>V>C | Category<br>C>V | Total<br>V>C | Total<br>C>V |
|-----------------------------------------------------------|----------|-----------------|-----------------|--------------|--------------|
| GO:0006732~coenzyme metabolic process                     | 1.71E-04 | 4               | 30              | 335          | 419          |
| GO:0006629~lipid metabolic process                        | 4.83E-04 | 13              | 46              | 335          | 419          |
| GO:0051186~cofactor metabolic process                     | 7.85E-04 | 6               | 31              | 335          | 419          |
| GO:0044255~cellular lipid metabolic process               | 1.19E-03 | 9               | 36              | 335          | 419          |
| GO:0044262~cellular carbohydrate metabolic process        | 2.62E-03 | 5               | 26              | 335          | 419          |
| GO:0005975~carbohydrate metabolic process                 | 3.56E-03 | 14              | 42              | 335          | 419          |
| GO:0009056~catabolic process                              | 8.68E-03 | 20              | 49              | 335          | 419          |
| GO:0044248~cellular catabolic process                     | 1.41E-02 | 18              | 44              | 335          | 419          |
| GO:0051188~cofactor biosynthetic process                  | 2.91E-02 | 2               | 14              | 335          | 419          |
| GO:0009108~coenzyme biosynthetic process                  | 2.91E-02 | 2               | 14              | 335          | 419          |
| GO:0044275~cellular carbohydrate catabolic process        | 2.91E-02 | 2               | 14              | 335          | 419          |
| GO:0008610~lipid biosynthetic process                     | 2.91E-02 | 2               | 14              | 335          | 419          |
| GO:0006091~generation of precursor metabolites and energy | 3.93E-02 | 18              | 40              | 335          | 419          |
| GO:0009064~glutamine family amino acid metabolic process  | 3.98E-02 | 0               | 9               | 335          | 419          |
| GO:0032787~monocarboxylic acid metabolic process          | 4.03E-02 | 4               | 17              | 335          | 419          |
| GO:0016052~carbohydrate catabolic process                 | 4.25E-02 | 3               | 15              | 335          | 419          |
| GO:0006096~glycolysis                                     | 4.37E-02 | 1               | 11              | 335          | 419          |
| GO:0006066~alcohol metabolic process                      | 4.40E-02 | 7               | 22              | 335          | 419          |
| GO:0046164~alcohol catabolic process                      | 4.40E-02 | 2               | 13              | 335          | 419          |
| GO:0046365~monosaccharide catabolic process               | 4.40E-02 | 2               | 13              | 335          | 419          |
| GO:0019320~hexose catabolic process                       | 4.40E-02 | 2               | 13              | 335          | 419          |
| GO:0006007~glucose catabolic process                      | 4.40E-02 | 2               | 13              | 335          | 419          |
| GO:0006006~glucose metabolic process                      | 4.40E-02 | 2               | 13              | 335          | 419          |
| GO:0044265~cellular macromolecule catabolic process       | 5.39E-02 | 8               | 23              | 335          | 419          |
| GO:0003008~system process                                 | 5.58E-02 | 17              | 37              | 335          | 419          |
| GO:0016310~phosphorylation                                | 7.02E-02 | 17              | 36              | 335          | 419          |
| GO:0005996~monosaccharide metabolic process               | 8.07E-02 | 4               | 15              | 335          | 419          |
| GO:0019318~hexose metabolic process                       | 8.07E-02 | 4               | 15              | 335          | 419          |
| GO:0009057~macromolecule catabolic process                | 8.69E-02 | 11              | 26              | 335          | 419          |
| GO:0006936~muscle contraction                             | 9.63E-02 | 2               | 11              | 335          | 419          |
| GO:0030534~adult behavior                                 | 9.63E-02 | 2               | 11              | 335          | 419          |
| GO:0003012~muscle system process                          | 9.63E-02 | 2               | 11              | 335          | 419          |

Table S10. Gene Ontology terms with directional bias toward control (C)&gt;QMP (Q)

| Term                                                     | <i>P</i> -value | Category<br>C>Q | Category<br>Q>C | Total<br>C>Q | Total<br>Q>C |
|----------------------------------------------------------|-----------------|-----------------|-----------------|--------------|--------------|
| GO:0006520~amino acid metabolic process                  | 3.27E-03        | 12              | 1               | 50           | 56           |
| GO:0006519~amino acid and derivative metabolic process   | 3.27E-03        | 12              | 1               | 50           | 56           |
| GO:0006807~nitrogen compound metabolic process           | 1.23E-02        | 13              | 3               | 50           | 56           |
| GO:0009309~amine biosynthetic process                    | 1.77E-02        | 8               | 0               | 50           | 56           |
| GO:0044271~nitrogen compound biosynthetic process        | 1.77E-02        | 8               | 0               | 50           | 56           |
| GO:0008652~amino acid biosynthetic process               | 1.77E-02        | 8               | 0               | 50           | 56           |
| GO:0009308~amine metabolic process                       | 2.26E-02        | 12              | 3               | 50           | 56           |
| GO:0006082~organic acid metabolic process                | 2.63E-02        | 13              | 4               | 50           | 56           |
| GO:0019752~carboxylic acid metabolic process             | 2.63E-02        | 13              | 4               | 50           | 56           |
| GO:0009064~glutamine family amino acid metabolic process | 7.19E-02        | 6               | 0               | 50           | 56           |

Table S11. Gene Ontology terms with directional bias toward QMP (Q)&gt;control (C)

| Term                                                                  | P Value  | Category<br>C>Q | Category<br>Q>C | Total<br>C>Q | Total<br>Q>C |
|-----------------------------------------------------------------------|----------|-----------------|-----------------|--------------|--------------|
| GO:0044260~cellular macromolecule metabolic process                   | 9.52E-06 | 3               | 26              | 50           | 56           |
| GO:0044267~cellular protein metabolic process                         | 9.52E-06 | 3               | 26              | 50           | 56           |
| GO:0019538~protein metabolic process                                  | 9.52E-06 | 3               | 26              | 50           | 56           |
| GO:0009057~macromolecule catabolic process                            | 2.97E-03 | 0               | 12              | 50           | 56           |
| GO:0044265~cellular macromolecule catabolic process                   | 5.80E-03 | 0               | 11              | 50           | 56           |
| GO:0006508~proteolysis                                                | 9.87E-03 | 2               | 14              | 50           | 56           |
| GO:0009987~cellular process                                           | 1.03E-02 | 33              | 49              | 50           | 56           |
| GO:0043285~biopolymer catabolic process                               | 1.11E-02 | 0               | 10              | 50           | 56           |
| GO:0030163~protein catabolic process                                  | 1.11E-02 | 0               | 10              | 50           | 56           |
| GO:0043170~macromolecule metabolic process                            | 1.23E-02 | 14              | 30              | 50           | 56           |
| GO:0044257~cellular protein catabolic process                         | 2.08E-02 | 0               | 9               | 50           | 56           |
| GO:0019941~modification-dependent protein catabolic process           | 2.08E-02 | 0               | 9               | 50           | 56           |
| GO:0006511~ubiquitin-dependent protein catabolic process              | 2.08E-02 | 0               | 9               | 50           | 56           |
| GO:0051603~proteolysis involved in cellular protein catabolic process | 2.08E-02 | 0               | 9               | 50           | 56           |
| GO:0043632~modification-dependent macromolecule catabolic process     | 2.08E-02 | 0               | 9               | 50           | 56           |
| GO:0043283~biopolymer metabolic process                               | 2.91E-02 | 6               | 18              | 50           | 56           |
| GO:0043412~biopolymer modification                                    | 5.98E-02 | 1               | 9               | 50           | 56           |
| GO:0006464~protein modification process                               | 5.98E-02 | 1               | 9               | 50           | 56           |

Table S12. Quantitative proteomic analyses of protein abundance in the hemolymph of foragers and nurses

| Description                                                                                                                                                    | P-value  | logFC protein (F-N) | logFC RNA (F-N) |
|----------------------------------------------------------------------------------------------------------------------------------------------------------------|----------|---------------------|-----------------|
| GB12364-RA [PREDICTED: Apis mellifera similar to fumarylacetoacetate hydrolase domain containing 2A, transcript variant 2 (LOC410635), mRNA]                   | 1.49E-03 | 1.12                | 0.17            |
| GB19860-RA [PREDICTED: Apis mellifera similar to Heat shock protein cognate 5 CG8542-PA (LOC408605), mRNA]                                                     | 1.61E-03 | 1.54                | 0.24            |
| GB12113-RA [PREDICTED: Apis mellifera similar to porin CG6647-PA, isoform A (LOC551325), mRNA]                                                                 | 3.39E-03 | 0.71                | NA              |
| GB16443-RA [PREDICTED: Apis mellifera similar to lethal (1) G0334 CG7010-PD, isoform D, transcript variant 1 (LOC551103), mRNA]                                | 4.54E-03 | 1.61                | -0.09           |
| GB12526-RA [PREDICTED: Apis mellifera similar to lethal (2) k05713 CG8256-PC, isoform C (LOC551904), mRNA]                                                     | 4.95E-03 | 1.84                | 0.69            |
| GB16464-RA [PREDICTED: Apis mellifera similar to mitochondrial malate dehydrogenase precursor, transcript variant 1 (LOC408950), mRNA]                         | 5.00E-03 | 1.57                | NA              |
| GB15172-RA [PREDICTED: Apis mellifera similar to lethal (1) G0255 CG4094-PA, isoform A (LOC724321), mRNA]                                                      | 7.70E-03 | 2.03                | 0.06            |
| GB15039-RA [PREDICTED: Apis mellifera similar to Enolase CG17654-PA, isoform A (LOC552678), partial mRNA]                                                      | 7.77E-03 | 0.71                | 0.10            |
| GB20012-RA [PREDICTED: Apis mellifera similar to CG10664-PA, isoform A (LOC412396), mRNA]                                                                      | 9.14E-03 | 1.29                | 0.12            |
| GB16485-RA [PREDICTED: Apis mellifera similar to ATP synthase D chain, mitochondrial (LOC410557), mRNA]                                                        | 9.24E-03 | 1.54                | 0.39            |
| GB18363-RA [Apis mellifera odorant binding protein 13 (Obp13), mRNA]                                                                                           | 9.40E-03 | -3.56               | -2.13           |
| GB15252-RA [PREDICTED: Apis mellifera similar to CG5548-PA (LOC724827), mRNA]                                                                                  | 9.71E-03 | 1.38                | -0.06           |
| GB14247-RA [PREDICTED: Apis mellifera similar to easter CG4920-PA (LOC726256), mRNA]                                                                           | 1.07E-02 | -1.41               | 1.46            |
| GB16568-RA [PREDICTED: Apis mellifera similar to CG11015-PA (LOC552610), mRNA]                                                                                 | 1.14E-02 | 1.92                | 0.18            |
| GB16927-RA [PREDICTED: Apis mellifera hypothetical LOC408280 (LOC408280), mRNA]                                                                                | 1.25E-02 | 1.75                | 2.17            |
| GB19460-RA [PREDICTED: Apis mellifera similar to Aldolase CG6058-PF, isoform F (LOC550785), mRNA]                                                              | 1.26E-02 | 1.45                | -0.45           |
| GB19460-RA [PREDICTED: Apis mellifera similar to Aldolase CG6058-PF, isoform F (LOC550785), mRNA]                                                              | 1.26E-02 | 1.45                | -0.46           |
| GB11655-RA [PREDICTED: Apis mellifera similar to Succinyl coenzyme A synthetase subunit CG1065-PA (LOC551403), mRNA]                                           | 1.30E-02 | 2.44                | -0.21           |
| GB14791-RA [PREDICTED: Apis mellifera similar to bellwether CG3612-PA, transcript variant 1 (LOC409114), mRNA]                                                 | 1.42E-02 | 1.69                | 0.02            |
| GB17538-RA [Apis mellifera hymenoptaecin (LOC406142), mRNA]                                                                                                    | 1.45E-02 | 1.74                | 2.35            |
| GB13223-RA [PREDICTED: Apis mellifera similar to Ferritin 2 light chain homologue CG1469-PA, isoform A (LOC551684), mRNA]                                      | 1.53E-02 | -2.28               | -0.01           |
| GB14361-RA [PREDICTED: Apis mellifera similar to Larval serum protein 2 CG6806-PA (LOC551648), mRNA]                                                           | 1.64E-02 | -2.27               | -4.22           |
| GB18955-RA [PREDICTED: Apis mellifera similar to Phospholipid hydroperoxide glutathione peroxidase, mitochondrial precursor (PHGPx) (GPX-4) (LOC726269), mRNA] | 1.96E-02 | -2.95               | 0.17            |
| GB13073-RA [PREDICTED: Apis mellifera similar to CG5214-PA (LOC409155), mRNA]                                                                                  | 1.99E-02 | 1.84                | 0.14            |
| GB13928-RA [PREDICTED: Apis mellifera similar to lethal (2) 35Di CG13240-PA, isoform A (LOC725712), mRNA]                                                      | 2.04E-02 | 2.24                | 0.06            |
| GB17626-RA [PREDICTED: Apis mellifera similar to CG7430-PA, transcript variant 1 (LOC551039), mRNA]                                                            | 2.34E-02 | 1.54                | 0.03            |
| GB16552-RA [PREDICTED: Apis mellifera similar to CG9796-PA (LOC552600), mRNA]                                                                                  | 2.43E-02 | -3.07               | -3.28           |
| GB13320-RA [PREDICTED: Apis mellifera hypothetical LOC551541 (LOC551541), mRNA]                                                                                | 2.52E-02 | 1.93                | 0.24            |
| GB10717-RA [PREDICTED: Apis mellifera similar to Muscle protein 20 CG4696-PA, isoform A (LOC408972), mRNA]                                                     | 2.54E-02 | 0.53                | 0.14            |
| GB10972-RA [PREDICTED: Apis mellifera thioredoxin peroxidase, transcript variant 1 (Tpx-3), mRNA]                                                              | 2.59E-02 | 1.90                | -0.16           |
| GB13508-RA [PREDICTED: Apis mellifera similar to ubiquinol-cytochrome c reductase, Rieske iron-sulfur polypeptide 1 (LOC411183), mRNA]                         | 2.73E-02 | 2.14                | 0.04            |
| GB15716-RA [PREDICTED: Apis mellifera similar to CG5028-PA (LOC410396), mRNA]                                                                                  | 2.78E-02 | 2.23                | 0.11            |
| GB15696-RA [PREDICTED: Apis mellifera hypothetical protein LOC726734 (LOC726734), mRNA]                                                                        | 2.85E-02 | 1.63                | 1.68            |
| GB12573-RA [PREDICTED: Apis mellifera similar to lethal (1) G0030 CG3861-PA, isoform A (LOC410059), mRNA]                                                      | 2.96E-02 | 1.95                | 0.36            |
| GB12855-RA [PREDICTED: Apis mellifera similar to Neural conserved at 73EF CG11661-PA, isoform A, transcript variant 1 (LOC408286), mRNA]                       | 3.16E-02 | 2.28                | 0.29            |
| GB14645-RA [PREDICTED: Apis mellifera similar to CG6124-PA (LOC724421), mRNA]                                                                                  | 3.35E-02 | 1.30                | 0.41            |
| GB13536-RA [PREDICTED: Apis mellifera similar to CG11963-PA (LOC551958), mRNA]                                                                                 | 3.59E-02 | 2.19                | 0.29            |
| GB11846-RA [PREDICTED: Apis mellifera similar to Neuroglian CG1634-PA, isoform A (LOC411829), mRNA]                                                            | 3.61E-02 | -1.34               | -0.17           |
| GB17852-RA [PREDICTED: Apis mellifera similar to Ect3 CG3132-PA (LOC725756), mRNA]                                                                             | 3.86E-02 | -1.42               | -0.38           |
| GB19745-RA [Apis mellifera transferrin (Trf), mRNA]                                                                                                            | 4.20E-02 | -1.13               | -1.00           |
| GB19422-RA [PREDICTED: Apis mellifera similar to lethal (1) G0156 CG12233-PA, isoform A (LOC409292), mRNA]                                                     | 4.49E-02 | 1.36                | 0.10            |
| GB11431-RA [PREDICTED: Apis mellifera similar to Nucleosome remodeling factor – 38kD CG4634-PA (LOC409774), mRNA]                                              | 4.49E-02 | 1.23                | 0.01            |
| GB14607-RA [Apis mellifera short-chain dehydrogenase/reductase (LOC406147), mRNA]                                                                              | 4.64E-02 | -3.30               | 0.90            |
| GB10069-RA [PREDICTED: Apis mellifera similar to Thor CG8846-PA (LOC725039), mRNA]                                                                             | 4.81E-02 | 0.67                | -0.13           |
| GB12488-RA [PREDICTED: Apis mellifera similar to Aconitase CG9244-PB (LOC408446), mRNA]                                                                        | 5.25E-02 | 1.49                | 0.27            |
| GB10695-RA [PREDICTED: Apis mellifera similar to Pyruvate kinase CG7070-PB, isoform B (LOC552007), mRNA]                                                       | 5.49E-02 | 1.37                | 0.26            |
| GB14798-RA [PREDICTED: Apis mellifera similar to Glyceraldehyde 3 phosphate dehydrogenase 1 CG12055-PA, isoform A, transcript variant 2 (LOC410122), mRNA]     | 5.63E-02 | 1.64                | 0.17            |
| GB14710-RA [PREDICTED: Apis mellifera similar to CG4572-PB, isoform B (LOC410451), mRNA]                                                                       | 5.70E-02 | -0.94               | -0.35           |
| GB16494-RA [PREDICTED: Apis mellifera similar to ATPase coupling factor 6 CG4412-PA (LOC726120), mRNA]                                                         | 5.94E-02 | 2.17                | 0.25            |
| GB17699-RA [PREDICTED: Apis mellifera similar to CG8680-PA (LOC412328), mRNA]                                                                                  | 6.05E-02 | 2.26                | 0.14            |

|                                                                                                                                                                                                                                      |          |       |       |
|--------------------------------------------------------------------------------------------------------------------------------------------------------------------------------------------------------------------------------------|----------|-------|-------|
| GB11056-RA [PREDICTED: <i>Apis mellifera</i> similar to Phosphoglycerate kinase, transcript variant 1 (LOC411576), mRNA]                                                                                                             | 6.07E-02 | 1.41  | 0.24  |
| GB13999-RA [ <i>Apis mellifera</i> vitellogenin (Vg), mRNA]                                                                                                                                                                          | 6.15E-02 | -2.07 | -3.12 |
| GB16459-RA [ <i>Apis mellifera</i> major royal jelly protein 3 (Mrjp3), mRNA]                                                                                                                                                        | 6.61E-02 | -1.91 | 0.14  |
| GB19501-RA [PREDICTED: <i>Apis mellifera</i> similar to CG5023-PA (LOC408532), mRNA]                                                                                                                                                 | 6.61E-02 | 0.77  | 0.47  |
| GB14490-RA [PREDICTED: <i>Apis mellifera</i> similar to ciboulot CG4944-PB, isoform B (LOC551528), mRNA]                                                                                                                             | 6.81E-02 | -2.21 | -0.42 |
| GB17499-RA [ <i>Apis mellifera</i> ADP/ATP translocase (Ant), mRNA]                                                                                                                                                                  | 6.91E-02 | 1.49  | 0.14  |
| GB11022-RA [ <i>Apis mellifera</i> major royal jelly protein 7 (Mrjp7), mRNA]                                                                                                                                                        | 6.95E-02 | -2.13 | -0.23 |
| GB10514-RA [PREDICTED: <i>Apis mellifera</i> similar to Tubulin alpha-1 chain (LOC408388), mRNA]                                                                                                                                     | 7.11E-02 | -0.73 | 0.24  |
| GB10869-RA [ <i>Apis mellifera</i> hexamerin 70b (LOC406117), mRNA]                                                                                                                                                                  | 7.72E-02 | -3.49 | 0.10  |
| GB13596-RA [PREDICTED: <i>Apis mellifera</i> similar to ATP synthase- CG11154-PA, isoform A (LOC551766), mRNA]                                                                                                                       | 7.77E-02 | 1.35  | 0.12  |
| GB17503-RA [PREDICTED: <i>Apis mellifera</i> similar to CG8993-PA (LOC410120), mRNA]                                                                                                                                                 | 7.79E-02 | 1.02  | -0.01 |
| GB18917-RA [PREDICTED: <i>Apis mellifera</i> similar to Cofilin/actin-depolymerizing factor homolog (Protein D61) (Protein twinstar) (LOC725718), mRNA]                                                                              | 8.16E-02 | -1.07 | 0.34  |
| GB16445-RA [PREDICTED: <i>Apis mellifera</i> similar to CG12859-PA (LOC725315), mRNA]                                                                                                                                                | 8.45E-02 | 0.99  | 0.25  |
| GB19380-RA [PREDICTED: <i>Apis mellifera</i> similar to thioredoxin peroxidase 1 CG1633-PA, isoform A, transcript variant 1 (LOC409954), mRNA]                                                                                       | 8.48E-02 | 0.80  | 0.36  |
| GB10139-RA [PREDICTED: <i>Apis mellifera</i> similar to Glutamine synthetase 2 CG1743-PC, isoform C (LOC410066), mRNA]                                                                                                               | 8.76E-02 | 0.53  | -0.10 |
| GB19293-RA [PREDICTED: <i>Apis mellifera</i> mitochondrial cytochrome C (CytC), mRNA]                                                                                                                                                | 8.77E-02 | 1.18  | 1.21  |
| GB17444-RA [PREDICTED: <i>Apis mellifera</i> similar to CG32521-PA, isoform A (LOC725926), mRNA]                                                                                                                                     | 8.82E-02 | 0.19  | 0.97  |
| GB10836-RA [PREDICTED: <i>Apis mellifera</i> similar to Hsc70Cb CG6603-PA, isoform A, transcript variant 1 (LOC408706), mRNA]                                                                                                        | 8.95E-02 | 0.44  | 0.36  |
| GB10284-RA [PREDICTED: <i>Apis mellifera</i> similar to CG6463-PA (LOC413014), mRNA]                                                                                                                                                 | 9.10E-02 | 1.79  | 0.15  |
| GB10855-RA [PREDICTED: <i>Apis mellifera</i> similar to plasma glutamate carboxypeptidase, transcript variant 1 (LOC410149), mRNA]                                                                                                   | 9.12E-02 | -1.06 | 0.11  |
| GB18969-RA [PREDICTED: <i>Apis mellifera</i> similar to 60 kDa heat shock protein, mitochondrial precursor (Hsp60) (60 kDa chaperonin) (CPN60) (Heat shock protein 60) (HSP-60) (Mitochondrial matrix protein P1) (LOC409384), mRNA] | 9.51E-02 | 0.75  | -0.15 |
| GB16153-RA [PREDICTED: <i>Apis mellifera</i> similar to Papilin CG33103-PB, isoform B, transcript variant 1 (LOC413021), mRNA]                                                                                                       | 1.01E-01 | -0.67 | -0.05 |
| GB11059-RA [PREDICTED: <i>Apis mellifera</i> similar to Retinoid- and fatty-acid binding protein CG11064-PA, transcript variant 1 (LOC408961), mRNA]                                                                                 | 1.03E-01 | -1.25 | NA    |
| GB11892-RA [PREDICTED: <i>Apis mellifera</i> similar to Glycogen phosphorylase, transcript variant 2 (LOC409267), mRNA]                                                                                                              | 1.04E-01 | 1.38  | -0.07 |
| GB12841-RA [PREDICTED: <i>Apis mellifera</i> similar to CG7580-PA (LOC726747), mRNA]                                                                                                                                                 | 1.05E-01 | 2.26  | 0.05  |
| GB12375-RA [PREDICTED: <i>Apis mellifera</i> similar to Chd64 CG14996-PB (LOC408572), mRNA]                                                                                                                                          | 1.05E-01 | -0.54 | 0.23  |
| GB17056-RA [PREDICTED: <i>Apis mellifera</i> similar to Cyclophilin 1 CG9916-PA (LOC409890), mRNA]                                                                                                                                   | 1.06E-01 | -0.70 | 0.11  |
| GB17056-RA [PREDICTED: <i>Apis mellifera</i> similar to Cyclophilin 1 CG9916-PA (LOC409890), mRNA]                                                                                                                                   | 1.06E-01 | -0.70 | -0.09 |
| [Antisense] GB17056-RA [PREDICTED: <i>Apis mellifera</i> similar to Cyclophilin 1 CG9916-PA (LOC409890), mRNA]                                                                                                                       | 1.06E-01 | -0.70 | -0.15 |
| GB13279-RA [PREDICTED: <i>Apis mellifera</i> similar to Tropomyosin-2 (Tropomyosin I) (LOC413204), mRNA]                                                                                                                             | 1.07E-01 | 1.41  | NA    |
| GB10708-RA [PREDICTED: <i>Apis mellifera</i> hypothetical LOC408807 (LOC408807), mRNA]                                                                                                                                               | 1.08E-01 | 1.34  | 1.89  |
| GB18819-RA [ <i>Apis mellifera</i> antennal-specific protein 3c precursor (Asp3c), mRNA]                                                                                                                                             | 1.10E-01 | -2.28 | -0.85 |
| GB19935-RA [PREDICTED: <i>Apis mellifera</i> similar to CG3609-PA (LOC552024), mRNA]                                                                                                                                                 | 1.10E-01 | -1.87 | -2.17 |
| GB11768-RA [ <i>Apis mellifera</i> major royal jelly protein 4 (Mrjp4), mRNA]                                                                                                                                                        | 1.10E-01 | -2.87 | -0.54 |
| GB11768-RA [ <i>Apis mellifera</i> major royal jelly protein 4 (Mrjp4), mRNA]                                                                                                                                                        | 1.10E-01 | -2.87 | -0.04 |
| GB19030-RA [PREDICTED: <i>Apis mellifera</i> similar to CG10638-PA, isoform A, transcript variant 1 (LOC552018), mRNA]                                                                                                               | 1.18E-01 | 0.65  | 0.69  |
| GB14888-RA [ <i>Apis mellifera</i> major royal jelly protein 1 (Mrjp1), mRNA]                                                                                                                                                        | 1.20E-01 | -1.86 | NA    |
| GB10973-RA [ <i>Apis mellifera</i> arginine kinase (Argk), mRNA]                                                                                                                                                                     | 1.21E-01 | -0.55 | -0.07 |
| GB12700-RA [PREDICTED: <i>Apis mellifera</i> similar to Histone H1 (LOC725238), mRNA]                                                                                                                                                | 1.24E-01 | -0.47 | 0.10  |
| GB16246-RA [ <i>Apis mellifera</i> major royal jelly protein 2 (Mrjp2), mRNA]                                                                                                                                                        | 1.25E-01 | -2.32 | 0.61  |
| GB16246-RA [ <i>Apis mellifera</i> major royal jelly protein 2 (Mrjp2), mRNA]                                                                                                                                                        | 1.25E-01 | -2.32 | 0.28  |
| GB11461-RA [PREDICTED: <i>Apis mellifera</i> similar to UGP CG4347-PA, isoform A, transcript variant 1 (LOC412069), mRNA]                                                                                                            | 1.25E-01 | 0.80  | 0.58  |
| GB11983-RA [PREDICTED: <i>Apis mellifera</i> similar to Angiotensin converting enzyme CG8827-PA, isoform A (LOC410074), mRNA]                                                                                                        | 1.27E-01 | -0.67 | 0.15  |
| GB12495-RA [PREDICTED: <i>Apis mellifera</i> hypothetical LOC552459 (LOC552459), mRNA]                                                                                                                                               | 1.27E-01 | 1.33  | 1.53  |
| GB10275-RA [PREDICTED: <i>Apis mellifera</i> similar to -Tubulin at 56D CG9277-PB, isoform B (LOC408782), mRNA]                                                                                                                      | 1.45E-01 | -0.46 | 0.38  |
| GB15044-RA [PREDICTED: <i>Apis mellifera</i> similar to CG6180-PA, transcript variant 1 (LOC408516), mRNA]                                                                                                                           | 1.53E-01 | -0.25 | -0.58 |
| GB20014-RA [PREDICTED: <i>Apis mellifera</i> similar to Glycerol-3-phosphate dehydrogenase [NAD+], cytoplasmic (GPD-C) (GPDH-C) (LOC551955), partial mRNA]                                                                           | 1.56E-01 | 1.41  | -0.06 |
| GB17439-RA [PREDICTED: <i>Apis mellifera</i> similar to succinate dehydrogenase complex, subunit A, flavoprotein (Fp), transcript variant 1 (LOC550667), mRNA]                                                                       | 1.60E-01 | 1.25  | 0.00  |
| GB19068-RA [PREDICTED: <i>Apis mellifera</i> similar to Lysosomal Pro-X carboxypeptidase precursor (Prolylcarboxypeptidase) (PRCP) (Proline carboxypeptidase) (Angiotensinase C) (Lysosomal carboxypeptidase C) (LOC551273), mRNA]   | 1.61E-01 | -1.64 | -0.24 |
| GB10133-RA [PREDICTED: <i>Apis mellifera</i> CuZn superoxide dismutase, transcript variant 1 (Sod1), mRNA]                                                                                                                           | 1.63E-01 | 0.80  | -0.10 |
| GB14261-RA [PREDICTED: <i>Apis mellifera</i> hypothetical protein LOC724386 (LOC724386), mRNA]                                                                                                                                       | 1.63E-01 | -2.04 | -1.52 |
| GB10282-RA [PREDICTED: <i>Apis mellifera</i> similar to Adenylate kinase-2 CG3140-PA (LOC551523), mRNA]                                                                                                                              | 1.70E-01 | 1.51  | -0.05 |
| GB19503-RA [PREDICTED: <i>Apis mellifera</i> similar to heat shock protein 8, transcript variant 1 (LOC410620), mRNA]                                                                                                                | 1.71E-01 | 1.29  | 0.04  |
| GB14832-RA [PREDICTED: <i>Apis mellifera</i> similar to Succinate dehydrogenase B CG3283-PA (LOC551169),                                                                                                                             | 1.73E-01 | 1.63  | 0.10  |

|                                                                                                                                                                                     |          |       |       |
|-------------------------------------------------------------------------------------------------------------------------------------------------------------------------------------|----------|-------|-------|
| mRNA]                                                                                                                                                                               |          |       |       |
| GB11658-RA [PREDICTED: Apis mellifera hypothetical LOC408608 (LOC408608), mRNA]                                                                                                     | 1.73E-01 | 1.91  | 0.05  |
| GB13365-RA [PREDICTED: Apis mellifera similar to CG17292-PA, isoform A (LOC727193), partial mRNA]                                                                                   | 1.74E-01 | 1.67  | -1.20 |
| GB15079-RA [PREDICTED: Apis mellifera similar to Glutamate dehydrogenase CG5320-PF, isoform F, transcript variant 1 (LOC409253), mRNA]                                              | 1.95E-01 | 0.94  | -0.21 |
| GB19509-RA [PREDICTED: Apis mellifera similar to SRY interacting protein 1 CG10939-PA (LOC413207), mRNA]                                                                            | 2.07E-01 | 0.78  | 0.21  |
| GB15052-RA [PREDICTED: Apis mellifera similar to Phosphoglyceromutase CG1721-PA, isoform A (LOC552736), mRNA]                                                                       | 2.09E-01 | 1.03  | 0.24  |
| GB15629-RA [PREDICTED: Apis mellifera similar to ATP synthase O subunit, mitochondrial precursor (Oligomycin sensitivity conferral protein) (OSCP) (LOC409236), mRNA]               | 2.13E-01 | 1.30  | 0.02  |
| GB20117-RA [PREDICTED: Apis mellifera hypothetical LOC552391 (LOC552391), mRNA]                                                                                                     | 2.14E-01 | -1.05 | -0.19 |
| GB19247-RA [PREDICTED: Apis mellifera similar to Elongation factor 2 (EF-2), transcript variant 1 (LOC409167), mRNA]                                                                | 2.27E-01 | 0.28  | -0.08 |
| GB12628-RA [PREDICTED: Apis mellifera similar to Oscillin CG6957-PA, isoform A, transcript variant 1 (LOC409520), mRNA]                                                             | 2.32E-01 | -0.65 | -0.16 |
| GB18109-RA [PREDICTED: Apis mellifera similar to CG6084-PA, isoform A, transcript variant 1 (LOC551968), mRNA]                                                                      | 2.37E-01 | 0.78  | 0.26  |
| GB15619-RA [PREDICTED: Apis mellifera similar to CG8036-PB, isoform B, transcript variant 1 (LOC550804), mRNA]                                                                      | 2.38E-01 | 0.45  | 0.28  |
| GB14284-RA [PREDICTED: Apis mellifera similar to Sorbitol dehydrogenase-2 CG4649-PA (LOC408871), mRNA]                                                                              | 2.44E-01 | -1.15 | -0.93 |
| GB12951-RA [PREDICTED: Apis mellifera similar to 14-3-3 CG17870-PC, isoform C, transcript variant 1 (LOC408289), mRNA]                                                              | 2.50E-01 | -0.55 | 0.21  |
| GB12951-RA [PREDICTED: Apis mellifera similar to 14-3-3 CG17870-PC, isoform C, transcript variant 1 (LOC408289), mRNA]                                                              | 2.50E-01 | -0.55 | 0.22  |
| GB12951-RA [PREDICTED: Apis mellifera similar to 14-3-3 CG17870-PC, isoform C, transcript variant 1 (LOC408289), mRNA]                                                              | 2.50E-01 | -0.55 | 0.17  |
| GB17035-RA [PREDICTED: Apis mellifera similar to CG15828-PB, isoform B (LOC410793), mRNA]                                                                                           | 2.59E-01 | -1.03 | 0.20  |
| GB10889-RA [PREDICTED: Apis mellifera similar to CG5080-PB, isoform B (LOC413792), partial mRNA]                                                                                    | 2.64E-01 | -0.41 | -0.34 |
| GB13004-RA [PREDICTED: Apis mellifera similar to CG12163-PA, isoform A (LOC408851), mRNA]                                                                                           | 2.65E-01 | -0.67 | 0.11  |
| GB17500-RA [PREDICTED: Apis mellifera hypothetical protein LOC725960 (LOC725960), mRNA]                                                                                             | 2.66E-01 | 0.34  | 0.42  |
| GB11503-RA [PREDICTED: Apis mellifera similar to CG5195-PA (LOC724779), mRNA]                                                                                                       | 2.68E-01 | -0.88 | 1.33  |
| GB11040-RA [PREDICTED: Apis mellifera similar to CG14476-PB, isoform B, transcript variant 2 (LOC551205), mRNA]                                                                     | 2.70E-01 | -1.18 | 0.18  |
| GB10477-RA [PREDICTED: Apis mellifera similar to B-cell receptor-associated protein 37 (LOC551944), mRNA]                                                                           | 2.73E-01 | 0.68  | -0.38 |
| GB15536-RA [PREDICTED: Apis mellifera similar to CG5397-PA (LOC410187), mRNA]                                                                                                       | 2.75E-01 | -1.51 | -0.28 |
| GB15299-RA [Apis mellifera fatty acid binding protein (Fabp), mRNA]                                                                                                                 | 2.80E-01 | -0.78 | -0.92 |
| GB12384-RA [PREDICTED: Apis mellifera similar to CG10467-PA (LOC552086), mRNA]                                                                                                      | 2.89E-01 | -1.07 | -0.97 |
| GB15291-RA [PREDICTED: Apis mellifera similar to ATP synthase gamma chain, mitochondrial precursor (LOC552699), mRNA]                                                               | 2.90E-01 | 0.80  | -0.02 |
| GB16429-RA [PREDICTED: Apis mellifera similar to Glucose-6-phosphate isomerase (GPI) (Phosphoglucose isomerase) (PGI) (Phosphohexose isomerase) (PHI) (LOC551154), mRNA]            | 2.96E-01 | 0.83  | -0.01 |
| GB18404-RA [PREDICTED: Apis mellifera similar to CG2862-PA, isoform A (LOC552670), mRNA]                                                                                            | 2.97E-01 | 0.65  | 0.12  |
| GB12913-RA [PREDICTED: Apis mellifera similar to Vacuolar ATP synthase subunit E (V-ATPase E subunit) (Vacuolar proton pump E subunit) (V-ATPase 28 kDa subunit) (LOC552720), mRNA] | 3.03E-01 | 0.96  | 0.19  |
| GB19582-RA [PREDICTED: Apis mellifera similar to Serine protease inhibitor 5 CG18525-PA, isoform A (LOC413749), mRNA]                                                               | 3.06E-01 | -0.58 | 1.00  |
| GB19819-RA [PREDICTED: Apis mellifera similar to Peroxidase CG3477-PA (LOC408953), mRNA]                                                                                            | 3.14E-01 | -1.15 | -0.15 |
| GB10622-RA [Apis mellifera major royal jelly protein 5 (Mrjp5), mRNA]                                                                                                               | 3.16E-01 | -0.59 | 1.50  |
| GB19171-RA [PREDICTED: Apis mellifera similar to Vacuolar H <sup>+</sup> -ATPase 55kD B subunit CG17369-PB, isoform B (LOC551721), mRNA]                                            | 3.30E-01 | 0.98  | 0.41  |
| GB10498-RA [PREDICTED: Apis mellifera similar to Peroxiredoxin 2540 CG11765-PA (LOC551975), mRNA]                                                                                   | 3.33E-01 | -1.52 | -0.28 |
| GB18498-RA [PREDICTED: Apis mellifera enoyl Coenzyme A hydratase, short chain, 1, mitochondrial (Echs1), mRNA]                                                                      | 3.40E-01 | -0.56 | -0.72 |
| GB16500-RA [PREDICTED: Apis mellifera similar to 40S ribosomal protein S3a (C3 protein) (LOC413296), mRNA]                                                                          | 3.44E-01 | -1.24 | -0.51 |
| GB19452-RA                                                                                                                                                                          | 3.45E-01 | -0.35 | -0.98 |
| GB19832-RA [PREDICTED: Apis mellifera similar to CG9514-PA (LOC408603), mRNA]                                                                                                       | 3.46E-01 | -0.60 | 0.06  |
| GB16903-RA [PREDICTED: Apis mellifera similar to cathD CG1548-PA (LOC409341), mRNA]                                                                                                 | 3.66E-01 | -1.66 | -0.80 |
| GB18381-RA [PREDICTED: Apis mellifera similar to Uev1A CG10640-PA, isoform A, transcript variant 1 (LOC409920), mRNA]                                                               | 3.69E-01 | 0.31  | 0.01  |
| GB14758-RA [PREDICTED: Apis mellifera similar to heat shock protein 90-alpha, transcript variant 1 (LOC408928), mRNA]                                                               | 3.75E-01 | -0.12 | 0.17  |
| GB17879-RA [PREDICTED: Apis mellifera similar to Peptidoglycan recognition protein SA CG11709-PA (LOC727472), mRNA]                                                                 | 3.83E-01 | -0.78 | 0.14  |
| GB15919-RA [PREDICTED: Apis mellifera similar to CG9977-PA (LOC551762), mRNA]                                                                                                       | 3.87E-01 | 2.16  | -0.08 |
| GB13559-RA [PREDICTED: Apis mellifera similar to CG7460-PB, transcript variant 1 (LOC413478), mRNA]                                                                                 | 3.92E-01 | -0.23 | 1.38  |
| GB19017-RA [Apis mellifera alpha-glucosidase (LOC406131), mRNA]                                                                                                                     | 3.96E-01 | -0.88 | 0.09  |
| GB15718-RA [PREDICTED: Apis mellifera similar to CG14207-PB, isoform B, transcript variant 1 (LOC408875), mRNA]                                                                     | 4.03E-01 | 0.36  | 0.10  |
| GB20070-RA [Apis mellifera alpha-glucosidase (Hbg2), mRNA]                                                                                                                          | 4.40E-01 | -0.42 | 0.71  |
| GB18767-RA [PREDICTED: Apis mellifera similar to CG9372-PA (LOC726126), mRNA]                                                                                                       | 4.43E-01 | -0.52 | -0.36 |
| GB12797-RA [PREDICTED: Apis mellifera similar to Trehalose-6-phosphate synthase 1 CG4104-PA (LOC408867), partial mRNA]                                                              | 4.55E-01 | 0.20  | 0.61  |
| GB17255-RA [PREDICTED: Apis mellifera similar to lethal (1) G0230 CG2968-PA (LOC552682), mRNA]                                                                                      | 4.63E-01 | 1.96  | 0.03  |

|                                                                                                                                                                                                                                                                         |          |       |       |
|-------------------------------------------------------------------------------------------------------------------------------------------------------------------------------------------------------------------------------------------------------------------------|----------|-------|-------|
| GB20017-RA [PREDICTED: <i>Apis mellifera</i> similar to TER94 CG2331-PA, isoform A, transcript variant 1 (LOC409377), mRNA]                                                                                                                                             | 4.71E-01 | -0.20 | 0.04  |
| GB16751-RA [PREDICTED: <i>Apis mellifera</i> similar to lethal (2) 06225 CG6105-PA (LOC726222), mRNA]                                                                                                                                                                   | 4.88E-01 | 0.58  | 0.16  |
| GB18538-RA                                                                                                                                                                                                                                                              | 4.89E-01 | 0.46  | -0.27 |
| GB19961-RA [PREDICTED: <i>Apis mellifera</i> similar to Gram-negative bacteria binding protein 1 CG6895-PA (LOC725832), mRNA]                                                                                                                                           | 4.96E-01 | 1.21  | 1.10  |
| GB10776-RA [PREDICTED: <i>Apis mellifera</i> similar to glycerol-3-phosphate dehydrogenase 1-like (LOC724574), mRNA]                                                                                                                                                    | 4.97E-01 | 0.75  | 0.00  |
| GB12951-RA [PREDICTED: <i>Apis mellifera</i> similar to 14-3-3 CG17870-PC, isoform C, transcript variant 1 (LOC408289), mRNA]                                                                                                                                           | 5.13E-01 | 0.43  | 0.21  |
| GB12951-RA [PREDICTED: <i>Apis mellifera</i> similar to 14-3-3 CG17870-PC, isoform C, transcript variant 1 (LOC408289), mRNA]                                                                                                                                           | 5.13E-01 | 0.43  | 0.22  |
| GB12951-RA [PREDICTED: <i>Apis mellifera</i> similar to 14-3-3 CG17870-PC, isoform C, transcript variant 1 (LOC408289), mRNA]                                                                                                                                           | 5.13E-01 | 0.43  | 0.17  |
| GB11665-RA [PREDICTED: <i>Apis mellifera</i> similar to Imaginal disc growth factor 4 CG1780-PA, isoform A (LOC413324), mRNA]                                                                                                                                           | 5.20E-01 | -0.35 | 0.91  |
| GB19387-RA [PREDICTED: <i>Apis mellifera</i> similar to Hexokinase A CG3001-PA, isoform A (LOC551005), mRNA]                                                                                                                                                            | 5.23E-01 | 0.66  | 0.23  |
| GB14138-RA [PREDICTED: <i>Apis mellifera</i> putative thioredoxin peroxidase (Gtpx-1), mRNA]                                                                                                                                                                            | 5.29E-01 | 0.26  | 0.22  |
| GB18313-RA [Apis mellifera prophenoloxidase (LOC406155), mRNA]                                                                                                                                                                                                          | 5.30E-01 | -0.27 | -0.51 |
| GB12029-RA [PREDICTED: <i>Apis mellifera</i> similar to CG1532-PA (LOC552722), mRNA]                                                                                                                                                                                    | 5.65E-01 | 0.26  | 0.04  |
| GB10699-RA [PREDICTED: <i>Apis mellifera</i> similar to CG7033-PA, isoform A, transcript variant 1 (LOC409809), mRNA]                                                                                                                                                   | 6.01E-01 | 0.47  | -0.06 |
| GB12857-RA [PREDICTED: <i>Apis mellifera</i> similar to CG3009-PA (LOC409277), partial mRNA]                                                                                                                                                                            | 6.34E-01 | 0.13  | 0.22  |
| GB16882-RA [PREDICTED: <i>Apis mellifera</i> similar to walrus CG8996-PB, isoform B, transcript variant 1 (LOC551710), mRNA]                                                                                                                                            | 6.36E-01 | -0.45 | -0.82 |
| GB16582-RA [PREDICTED: <i>Apis mellifera</i> hypothetical protein LOC725175 (LOC725175), mRNA]                                                                                                                                                                          | 6.41E-01 | 0.19  | 0.87  |
| GB16448-RA [PREDICTED: <i>Apis mellifera</i> similar to Annexin-B9 (Annexin-9) (Annexin IX), transcript variant 1 (LOC409533), mRNA]                                                                                                                                    | 6.55E-01 | 0.22  | 0.76  |
| GB11150-RA [PREDICTED: <i>Apis mellifera</i> similar to CG3560-PA (LOC551757), mRNA]                                                                                                                                                                                    | 6.60E-01 | 0.44  | 0.11  |
| GB12562-RA [PREDICTED: <i>Apis mellifera</i> similar to CG10513-PA, transcript variant 1 (LOC408421), mRNA]                                                                                                                                                             | 6.65E-01 | 0.23  | 0.72  |
| GB14496-RA [PREDICTED: <i>Apis mellifera</i> similar to CG11034-PA (LOC410337), mRNA]                                                                                                                                                                                   | 6.70E-01 | 0.05  | 1.08  |
| GB19297-RA [PREDICTED: <i>Apis mellifera</i> hypothetical protein LOC725074 (LOC725074), mRNA]                                                                                                                                                                          | 6.89E-01 | 0.60  | 0.90  |
| GB17736-RA [PREDICTED: <i>Apis mellifera</i> similar to Protein disulfide-isomerase precursor (PDI) (LOC726142), partial mRNA]                                                                                                                                          | 7.09E-01 | -0.78 | 0.32  |
| GB14852-RA [PREDICTED: <i>Apis mellifera</i> similar to heat shock protein 8, transcript variant 1 (LOC409418), mRNA]                                                                                                                                                   | 7.11E-01 | 0.10  | 0.09  |
| GB10560-RA [Apis mellifera translation elongation factor eEF-1 alpha chain (LOC408385), mRNA]                                                                                                                                                                           | 7.13E-01 | 0.25  | 0.13  |
| GB14205-RA [PREDICTED: <i>Apis mellifera</i> similar to CG11267-PA (LOC552531), mRNA]                                                                                                                                                                                   | 7.17E-01 | 0.26  | 0.09  |
| GB10989-RA [PREDICTED: <i>Apis mellifera</i> similar to Vacuolar ATP synthase catalytic subunit A, osteoclast isoform (V-ATPase subunit A 2) (Vacuolar proton pump alpha subunit 2) (V-ATPase 69 kDa subunit 2) (Isoform HO68), transcript variant 1 (LOC551093), mRNA] | 7.22E-01 | 0.25  | 0.15  |
| GB13821-RA [PREDICTED: <i>Apis mellifera</i> similar to CG3609-PA (LOC412231), mRNA]                                                                                                                                                                                    | 7.26E-01 | 0.09  | -0.54 |
| GB16806-RA [PREDICTED: <i>Apis mellifera</i> similar to CG15040-PA (LOC725387), mRNA]                                                                                                                                                                                   | 7.29E-01 | -0.25 | 0.81  |
| GB12956-RA [PREDICTED: <i>Apis mellifera</i> similar to yippee interacting protein 2 CG4600-PA (LOC408291), mRNA]                                                                                                                                                       | 7.61E-01 | 0.13  | -0.81 |
| GB17645-RA [PREDICTED: <i>Apis mellifera</i> similar to CG7453-PB, isoform B (LOC724585), mRNA]                                                                                                                                                                         | 7.82E-01 | 0.12  | 0.13  |
| GB12538-RA [PREDICTED: <i>Apis mellifera</i> similar to Tequila CG4821-PA, isoform A (LOC724971), mRNA]                                                                                                                                                                 | 8.50E-01 | -0.08 | 0.74  |
| GB14517-RA [PREDICTED: <i>Apis mellifera</i> similar to Isocitrate dehydrogenase CG7176-PC, isoform C, transcript variant 2 (LOC551276), mRNA]                                                                                                                          | 8.66E-01 | 0.18  | -0.29 |
| GB11298-RA                                                                                                                                                                                                                                                              | 8.70E-01 | -0.19 | 1.35  |
| GB14107-RA [PREDICTED: <i>Apis mellifera</i> similar to germinal histone H4 (LOC726520), mRNA]                                                                                                                                                                          | 8.76E-01 | -0.19 | -0.62 |
| GB19429-RA [PREDICTED: <i>Apis mellifera</i> similar to CG17838-PE, isoform E (LOC408775), mRNA]                                                                                                                                                                        | 8.80E-01 | -0.06 | -0.04 |
| GB16889-RA [PREDICTED: <i>Apis mellifera</i> similar to CG4382-PA (LOC409801), mRNA]                                                                                                                                                                                    | 8.88E-01 | -0.07 | 0.15  |
| GB18637-RA [PREDICTED: <i>Apis mellifera</i> similar to F-actin capping protein subunit beta (LOC409581), mRNA]                                                                                                                                                         | 8.90E-01 | 0.07  | 0.23  |
| GB15202-RA [PREDICTED: <i>Apis mellifera</i> similar to dj-1 CG1349-PA (LOC551882), mRNA]                                                                                                                                                                               | 9.01E-01 | 0.05  | 0.29  |
| GB15855-RA [PREDICTED: <i>Apis mellifera</i> similar to thioredoxin-2 CG31884-PA, isoform A (LOC409451), mRNA]                                                                                                                                                          | 9.08E-01 | -0.06 | 0.51  |
| GB15662-RA [PREDICTED: <i>Apis mellifera</i> similar to CG10962-PB, isoform B (LOC724721), mRNA]                                                                                                                                                                        | 9.33E-01 | -0.10 | 0.37  |
| GB15016-RA [PREDICTED: <i>Apis mellifera</i> similar to Heat shock protein cognate 3 CG4147-PA, isoform A (LOC409587), mRNA]                                                                                                                                            | 9.41E-01 | 0.03  | 0.41  |
| GB18727-RA [PREDICTED: <i>Apis mellifera</i> similar to CG5362-PA, transcript variant 1 (LOC411014), mRNA]                                                                                                                                                              | 9.44E-01 | 0.02  | -0.11 |
| GB16881-RA [Apis mellifera troponin T (TpnT), mRNA]                                                                                                                                                                                                                     | 9.59E-01 | 0.02  | -0.61 |
| GB19418-RA [Apis mellifera glucose oxidase (LOC406081), mRNA]                                                                                                                                                                                                           | 9.69E-01 | 0.02  | NA    |
| GB19418-RA [Apis mellifera glucose oxidase (LOC406081), mRNA]                                                                                                                                                                                                           | 9.69E-01 | 0.02  | NA    |
| GB11703-RA [PREDICTED: <i>Apis mellifera</i> similar to CG11550-PA (LOC413056), mRNA]                                                                                                                                                                                   | 9.89E-01 | 0.00  | -0.12 |
| GB15494-RA [PREDICTED: <i>Apis mellifera</i> hypothetical protein LOC724582 (LOC724582), mRNA]                                                                                                                                                                          | 9.93E-01 | -0.01 | 0.85  |
| GB13368-RA [PREDICTED: <i>Apis mellifera</i> lambda crystallin-like protein, transcript variant 1 (Cryl1), partial mRNA]                                                                                                                                                | 9.97E-01 | 0.00  | 0.94  |
| GB15518-RA [PREDICTED: <i>Apis mellifera</i> similar to CG9380-PA, isoform A (LOC552843), mRNA]                                                                                                                                                                         | 9.98E-01 | 0.00  | 0.30  |
| GB10939-RA [PREDICTED: <i>Apis mellifera</i> similar to Tropomyosin 2 CG4843-PB, isoform B (LOC408414), mRNA]                                                                                                                                                           | 9.99E-01 | 0.00  | -0.09 |

Table S13. Quantitative proteomic analyses of protein abundance in the hemolymph of bees fed rich vs poor diet

| Description                                                                                                                                                                                                                   | P-value  | logFC protein<br>(rich-poor) | logFC RNA<br>(rich-poor) |
|-------------------------------------------------------------------------------------------------------------------------------------------------------------------------------------------------------------------------------|----------|------------------------------|--------------------------|
| GB13999-RA [Apis mellifera vitellogenin (Vg), mRNA]                                                                                                                                                                           | 7.09E-06 | 3.02                         | 3.50                     |
| GB20017-RA [PREDICTED: Apis mellifera similar to TER94 CG2331-PA, isoform A, transcript variant 1 (LOC409377), mRNA]                                                                                                          | 6.71E-05 | -0.41                        | 0.43                     |
| GB18300-RA [PREDICTED: Apis mellifera similar to yellow-h CG1629-PA (LOC724293), mRNA]                                                                                                                                        | 2.22E-04 | -0.60                        | 0.55                     |
| GB16445-RA [PREDICTED: Apis mellifera similar to CG12859-PA (LOC725315), mRNA]                                                                                                                                                | 1.49E-03 | -0.85                        | 0.28                     |
| GB16485-RA [PREDICTED: Apis mellifera similar to ATP synthase D chain, mitochondrial (LOC410557), mRNA]                                                                                                                       | 3.19E-03 | -0.68                        | 0.07                     |
| GB18313-RA [Apis mellifera prophenoloxidase (LOC406155), mRNA]                                                                                                                                                                | 3.47E-03 | -0.07                        | 0.23                     |
| GB15291-RA [PREDICTED: Apis mellifera similar to ATP synthase gamma chain, mitochondrial precursor (LOC552699), mRNA]                                                                                                         | 5.14E-03 | -0.82                        | 0.31                     |
| GB11040-RA [PREDICTED: Apis mellifera similar to CG14476-PB, isoform B, transcript variant 2 (LOC551205), mRNA]                                                                                                               | 5.32E-03 | 0.17                         | 0.39                     |
| GB16568-RA [PREDICTED: Apis mellifera similar to CG11015-PA (LOC552610), mRNA]                                                                                                                                                | 5.50E-03 | -0.97                        | 0.27                     |
| GB10253-RA [PREDICTED: Apis mellifera similar to CG17280-PA (LOC726042), mRNA]                                                                                                                                                | 8.24E-03 | -1.05                        | -0.01                    |
| GB14791-RA [PREDICTED: Apis mellifera similar to bellwether CG3612-PA, transcript variant 1 (LOC409114), mRNA]                                                                                                                | 9.14E-03 | -0.91                        | 0.29                     |
| GB10737-RA [PREDICTED: Apis mellifera hypothetical protein LOC727161 (LOC727161), mRNA]                                                                                                                                       | 1.06E-02 | -2.07                        | -0.88                    |
| GB11508-RA [PREDICTED: Apis mellifera similar to CG5597-PA (LOC409695), mRNA]                                                                                                                                                 | 1.52E-02 | 0.22                         | 0.01                     |
| GB13320-RA [PREDICTED: Apis mellifera hypothetical LOC551541 (LOC551541), mRNA]                                                                                                                                               | 1.71E-02 | -0.59                        | -0.04                    |
| GB16889-RA [PREDICTED: Apis mellifera similar to CG4382-PA (LOC409801), mRNA]                                                                                                                                                 | 1.77E-02 | 1.34                         | 0.05                     |
| GB14517-RA [PREDICTED: Apis mellifera similar to Isocitrate dehydrogenase CG7176-PC, isoform C, transcript variant 2 (LOC551276), mRNA]                                                                                       | 1.77E-02 | -0.15                        | 0.68                     |
| GB16443-RA [PREDICTED: Apis mellifera similar to lethal (1) G0334 CG7010-PD, isoform D, transcript variant 1 (LOC551103), mRNA]                                                                                               | 1.82E-02 | -0.88                        | -0.20                    |
| GB16751-RA [PREDICTED: Apis mellifera similar to lethal (2) 06225 CG6105-PA (LOC726222), mRNA]                                                                                                                                | 1.82E-02 | -1.01                        | 0.06                     |
| GB12526-RA [PREDICTED: Apis mellifera similar to lethal (2) k05713 CG8256-PC, isoform C (LOC551904), mRNA]                                                                                                                    | 1.84E-02 | -0.99                        | 0.20                     |
| GB14832-RA [PREDICTED: Apis mellifera similar to Succinate dehydrogenase B CG3283-PA (LOC551169), mRNA]                                                                                                                       | 1.87E-02 | -0.75                        | 0.00                     |
| GB12364-RA [PREDICTED: Apis mellifera similar to fumarylacetoacetate hydrolase domain containing 2A, transcript variant 2 (LOC410635), mRNA]                                                                                  | 1.91E-02 | -0.79                        | 0.99                     |
| GB14284-RA [PREDICTED: Apis mellifera similar to Sorbitol dehydrogenase-2 CG4649-PA (LOC408871), mRNA]                                                                                                                        | 1.91E-02 | 0.54                         | 2.31                     |
| GB13596-RA [PREDICTED: Apis mellifera similar to ATP synthase- CG11154-PA, isoform A (LOC551766), mRNA]                                                                                                                       | 1.97E-02 | -0.86                        | 0.48                     |
| GB19422-RA [PREDICTED: Apis mellifera similar to lethal (1) G0156 CG12233-PA, isoform A (LOC409292), mRNA]                                                                                                                    | 2.21E-02 | -1.19                        | 0.31                     |
| GB17439-RA [PREDICTED: Apis mellifera similar to succinate dehydrogenase complex, subunit A, flavoprotein (Fp), transcript variant 1 (LOC550667), mRNA]                                                                       | 2.53E-02 | -0.77                        | 0.27                     |
| GB11658-RA [PREDICTED: Apis mellifera hypothetical LOC408608 (LOC408608), mRNA]                                                                                                                                               | 2.66E-02 | 1.93                         | 0.17                     |
| GB10282-RA [PREDICTED: Apis mellifera similar to Adenylate kinase-2 CG3140-PA (LOC551523), mRNA]                                                                                                                              | 2.72E-02 | -0.65                        | 0.21                     |
| GB13261-RA [PREDICTED: Apis mellifera similar to echinoid CG12676-PA (LOC413423), mRNA]                                                                                                                                       | 2.78E-02 | -0.24                        | -0.15                    |
| GB13223-RA [PREDICTED: Apis mellifera similar to Ferritin 2 light chain homologue CG1469-PA, isoform A (LOC551684), mRNA]                                                                                                     | 2.93E-02 | -0.34                        | 0.18                     |
| GB16678-RA [PREDICTED: Apis mellifera similar to CG8029-PB, isoform B (LOC725661), mRNA]                                                                                                                                      | 2.96E-02 | 0.26                         | 0.32                     |
| GB18969-RA [PREDICTED: Apis mellifera similar to 60 kDa heat shock protein, mitochondrial precursor (Hsp60) (60 kDa chaperonin) (CPN60) (Heat shock protein 60) (HSP-60) (Mitochondrial matrix protein P1) (LOC409384), mRNA] | 2.98E-02 | -0.61                        | 1.11                     |
| GB10477-RA [PREDICTED: Apis mellifera similar to B-cell receptor-associated protein 37 (LOC551944), mRNA]                                                                                                                     | 3.15E-02 | -0.72                        | 0.16                     |
| GB20117-RA [PREDICTED: Apis mellifera hypothetical LOC552391 (LOC552391), mRNA]                                                                                                                                               | 3.20E-02 | 0.72                         | 0.99                     |
| GB19819-RA [PREDICTED: Apis mellifera similar to Peroxidase CG3477-PA (LOC408953), mRNA]                                                                                                                                      | 3.45E-02 | 1.04                         | 0.42                     |
| GB15299-RA [Apis mellifera fatty acid binding protein (Fabp), mRNA]                                                                                                                                                           | 3.64E-02 | -0.17                        | 0.00                     |
| GB19297-RA [PREDICTED: Apis mellifera hypothetical protein LOC725074 (LOC725074), mRNA]                                                                                                                                       | 3.83E-02 | 0.59                         | 0.55                     |
| GB16464-RA [PREDICTED: Apis mellifera similar to mitochondrial malate dehydrogenase precursor, transcript variant 1 (LOC408950), mRNA]                                                                                        | 3.86E-02 | -0.71                        | NA                       |
| GB10708-RA [PREDICTED: Apis mellifera hypothetical LOC408807 (LOC408807), mRNA]                                                                                                                                               | 3.87E-02 | 0.73                         | -0.60                    |
| GB12797-RA [PREDICTED: Apis mellifera similar to Trehalose-6-phosphate synthase 1 CG4104-PA (LOC408867), partial mRNA]                                                                                                        | 4.19E-02 | -0.21                        | 0.18                     |
| GB12951-RA [PREDICTED: Apis mellifera similar to 14-3-3 CG17870-PC, isoform C, transcript variant 1 (LOC408289), mRNA]                                                                                                        | 4.21E-02 | -0.44                        | 0.05                     |
| GB12951-RA [PREDICTED: Apis mellifera similar to 14-3-3 CG17870-PC, isoform C, transcript variant 1 (LOC408289), mRNA]                                                                                                        | 4.21E-02 | -0.44                        | 0.02                     |
| GB12951-RA [PREDICTED: Apis mellifera similar to 14-3-3 CG17870-PC, isoform C, transcript variant 1 (LOC408289), mRNA]                                                                                                        | 4.21E-02 | -0.44                        | 0.00                     |
| GB18767-RA [PREDICTED: Apis mellifera similar to CG9372-PA (LOC726126), mRNA]                                                                                                                                                 | 4.28E-02 | 0.20                         | -0.04                    |
| GB17626-RA [PREDICTED: Apis mellifera similar to CG7430-PA, transcript variant 1 (LOC551039), mRNA]                                                                                                                           | 4.43E-02 | -0.91                        | 0.16                     |
| GB11655-RA [PREDICTED: Apis mellifera similar to Succinyl coenzyme A synthetase subunit CG1065-PA (LOC551403), mRNA]                                                                                                          | 4.51E-02 | -0.53                        | -0.04                    |
| GB13692-RA [PREDICTED: Apis mellifera similar to Ribosomal protein S28b CG2998-PA (LOC724531), mRNA]                                                                                                                          | 4.54E-02 | 0.27                         | 0.14                     |



|                                                                                                                                                          |          |       |       |
|----------------------------------------------------------------------------------------------------------------------------------------------------------|----------|-------|-------|
| GB19860-RA [PREDICTED: Apis mellifera similar to Heat shock protein cognate 5 CG8542-PA (LOC408605), mRNA]                                               | 4.68E-02 | -0.90 | 0.46  |
| GB11550-RA [PREDICTED: Apis mellifera hypothetical LOC552685 (LOC552685), mRNA]                                                                          | 4.71E-02 | -0.79 | 0.54  |
| GB15716-RA [PREDICTED: Apis mellifera similar to CG5028-PA (LOC410396), mRNA]                                                                            | 4.78E-02 | -0.62 | 0.33  |
| GB10628-RA                                                                                                                                               | 4.78E-02 | -0.69 | -0.10 |
| GB10628-RA                                                                                                                                               | 4.78E-02 | -0.69 | 0.05  |
| GB20012-RA [PREDICTED: Apis mellifera similar to CG10664-PA, isoform A (LOC412396), mRNA]                                                                | 5.00E-02 | -1.06 | -0.04 |
| GB17084-RA [PREDICTED: Apis mellifera similar to Fasciclin-3 precursor (Fasciclin III) (FAS III) (LOC724243), mRNA]                                      | 5.01E-02 | -0.49 | -0.21 |
| GB17500-RA [PREDICTED: Apis mellifera hypothetical protein LOC725960 (LOC725960), mRNA]                                                                  | 5.11E-02 | -0.60 | -0.66 |
| GB12488-RA [PREDICTED: Apis mellifera similar to Aconitase CG9244-PB (LOC408446), mRNA]                                                                  | 5.30E-02 | -0.81 | -0.20 |
| GB18497-RA [PREDICTED: Apis mellifera similar to Elongation factor Tu mitochondrial CG6050-PA, transcript variant 2 (LOC408328), mRNA]                   | 5.33E-02 | -0.85 | 0.07  |
| GB12605-RA [PREDICTED: Apis mellifera similar to alpha-2-macroglobulin-like 1 (LOC408926), mRNA]                                                         | 5.55E-02 | 0.21  | 0.73  |
| GB13073-RA [PREDICTED: Apis mellifera similar to CG5214-PA (LOC409155), mRNA]                                                                            | 5.55E-02 | -1.25 | 0.46  |
| GB14490-RA [PREDICTED: Apis mellifera similar to ciboulot CG4944-PB, isoform B (LOC551528), mRNA]                                                        | 6.23E-02 | 0.29  | 0.15  |
| GB19745-RA [Apis mellifera transferrin (Trf), mRNA]                                                                                                      | 6.51E-02 | 0.38  | 0.59  |
| GB14803-RA [PREDICTED: Apis mellifera similar to Trehalase precursor (Alpha, alpha-trehalase) (Alpha, alpha-trehalose glucohydrolase) (LOC410484), mRNA] | 6.71E-02 | 0.96  | 0.31  |
| GB19387-RA [PREDICTED: Apis mellifera similar to Hexokinase A CG3001-PA, isoform A (LOC551005), mRNA]                                                    | 6.78E-02 | -0.57 | -0.24 |
| GB20070-RA [Apis mellifera alpha-glucosidase (Hbg2), mRNA]                                                                                               | 7.33E-02 | 0.47  | 0.09  |
| GB16587-RA [PREDICTED: Apis mellifera hypothetical LOC551077 (LOC551077), mRNA]                                                                          | 7.56E-02 | 0.90  | 0.60  |
| GB15252-RA [PREDICTED: Apis mellifera similar to CG5548-PA (LOC724827), mRNA]                                                                            | 7.91E-02 | -0.76 | -0.07 |
| GB10284-RA [PREDICTED: Apis mellifera similar to CG6463-PA (LOC413014), mRNA]                                                                            | 7.94E-02 | -0.65 | -0.14 |
| GB11059-RA [PREDICTED: Apis mellifera similar to Retinoid- and fatty-acid binding protein CG11064-PA, transcript variant 1 (LOC408961), mRNA]            | 8.02E-02 | 0.43  | NA    |
| GB13917-RA [PREDICTED: Apis mellifera similar to Laminin B1 CG7123-PA, isoform A (LOC726736), mRNA]                                                      | 8.08E-02 | 0.60  | 0.18  |
| GB11431-RA [PREDICTED: Apis mellifera similar to Nucleosome remodeling factor - 38kD CG4634-PA (LOC409774), mRNA]                                        | 8.40E-02 | -0.74 | 0.46  |
| GB12495-RA [PREDICTED: Apis mellifera hypothetical LOC552459 (LOC552459), mRNA]                                                                          | 8.62E-02 | -0.50 | -0.14 |
| GB20014-RA [PREDICTED: Apis mellifera similar to Glycerol-3-phosphate dehydrogenase [NAD+], cytoplasmic (GPD-C) (GPDH-C) (LOC551955), partial mRNA]      | 8.73E-02 | -0.47 | 0.49  |
| GB12113-RA [PREDICTED: Apis mellifera similar to porin CG6647-PA, isoform A (LOC551325), mRNA]                                                           | 8.80E-02 | -0.81 | NA    |
| GB18004-RA [PREDICTED: Apis mellifera similar to CG31075-PA (LOC408559), mRNA]                                                                           | 9.01E-02 | -0.15 | 0.66  |
| GB12700-RA [PREDICTED: Apis mellifera similar to Histone H1 (LOC725238), mRNA]                                                                           | 9.32E-02 | -0.43 | 0.04  |
| GB19171-RA [PREDICTED: Apis mellifera similar to Vacuolar H+-ATPase 55kD B subunit CG17369-PB, isoform B (LOC551721), mRNA]                              | 9.42E-02 | -0.40 | 0.39  |
| GB14496-RA [PREDICTED: Apis mellifera similar to CG11034-PA (LOC410337), mRNA]                                                                           | 9.80E-02 | 0.24  | 0.74  |
| GB17852-RA [PREDICTED: Apis mellifera similar to Ect3 CG3132-PA (LOC725756), mRNA]                                                                       | 9.80E-02 | -0.23 | 0.11  |
| GB15855-RA [PREDICTED: Apis mellifera similar to thioredoxin-2 CG31884-PA, isoform A (LOC409451), mRNA]                                                  | 9.84E-02 | 0.32  | 0.33  |
| GB18917-RA [PREDICTED: Apis mellifera similar to Cofilin/actin-depolymerizing factor homolog (Protein D61) (Protein twinstar) (LOC725718), mRNA]         | 1.02E-01 | -0.28 | 0.01  |
| GB17499-RA [Apis mellifera ADP/ATP translocase (Ant), mRNA]                                                                                              | 1.05E-01 | -0.45 | -0.17 |
| GB12855-RA [PREDICTED: Apis mellifera similar to Neural conserved at 73EF CG11661-PA, isoform A, transcript variant 1 (LOC408286), mRNA]                 | 1.05E-01 | -0.99 | -0.06 |
| GB10695-RA [PREDICTED: Apis mellifera similar to Pyruvate kinase CG7070-PB, isoform B (LOC552007), mRNA]                                                 | 1.06E-01 | -0.56 | -0.14 |
| GB12600-RA [PREDICTED: Apis mellifera similar to Ccp84Ad CG2341-PA (LOC727197), mRNA]                                                                    | 1.08E-01 | -0.59 | 0.01  |
| GB12600-RA [PREDICTED: Apis mellifera similar to Ccp84Ad CG2341-PA (LOC727197), mRNA]                                                                    | 1.08E-01 | -0.59 | 0.15  |
| GB11933-RA [PREDICTED: Apis mellifera similar to acid alpha-glucosidase (LOC409365), mRNA]                                                               | 1.11E-01 | -0.36 | 0.06  |
| GB13536-RA [PREDICTED: Apis mellifera similar to CG11963-PA (LOC551958), mRNA]                                                                           | 1.28E-01 | -0.64 | 0.08  |
| GB17804-RA [PREDICTED: Apis mellifera similar to tubulin-specific chaperone a (LOC412930), mRNA]                                                         | 1.29E-01 | 0.45  | 0.17  |
| GB12628-RA [PREDICTED: Apis mellifera similar to Oscillin CG6957-PA, isoform A, transcript variant 1 (LOC409520), mRNA]                                  | 1.33E-01 | -0.27 | 0.32  |
| GB13928-RA [PREDICTED: Apis mellifera similar to lethal (2) 35Di CG13240-PA, isoform A (LOC725712), mRNA]                                                | 1.35E-01 | -0.85 | -0.12 |
| GB19832-RA [PREDICTED: Apis mellifera similar to CG9514-PA (LOC408603), mRNA]                                                                            | 1.42E-01 | 0.86  | 1.25  |
| GB16494-RA [PREDICTED: Apis mellifera similar to ATPase coupling factor 6 CG4412-PA (LOC726120), mRNA]                                                   | 1.43E-01 | -0.73 | 0.16  |
| GB16448-RA [PREDICTED: Apis mellifera similar to Annexin-B9 (Annexin-9) (Annexin IX), transcript variant 1 (LOC409533), mRNA]                            | 1.50E-01 | 0.20  | 0.27  |
| GB15039-RA [PREDICTED: Apis mellifera similar to Enolase CG17654-PA, isoform A (LOC552678), partial mRNA]                                                | 1.54E-01 | -0.62 | -0.41 |
| GB13399-RA [PREDICTED: Apis mellifera similar to Myosin regulatory light chain 2 (MLC-2) (LOC409881), mRNA]                                              | 1.59E-01 | 1.47  | 0.12  |
| GB15662-RA [PREDICTED: Apis mellifera similar to CG10962-PB, isoform B (LOC724721), mRNA]                                                                | 1.60E-01 | 0.54  | -0.73 |
| GB10453-RA [PREDICTED: Apis mellifera similar to CG3777-PB, isoform B (LOC408970), mRNA]                                                                 | 1.62E-01 | -0.35 | 0.25  |
| GB12402-RA [PREDICTED: Apis mellifera similar to CG1707-PA (LOC551915), mRNA]                                                                            | 1.63E-01 | -0.19 | 0.13  |
| GB12614-RA [PREDICTED: Apis mellifera similar to Actin-87E, transcript variant 2 (LOC410075), mRNA]                                                      | 1.69E-01 | -0.60 | -0.07 |

|                                                                                                                                                                                                       |          |       |       |
|-------------------------------------------------------------------------------------------------------------------------------------------------------------------------------------------------------|----------|-------|-------|
| GB11117-RA [PREDICTED: Apis mellifera similar to LRP16 protein, transcript variant 2 (LOC408589), mRNA]                                                                                               | 1.69E-01 | -0.60 | -0.06 |
| GB15927-RA [PREDICTED: Apis mellifera similar to CG40500-PA.3 (LOC726309), mRNA]                                                                                                                      | 1.71E-01 | 0.82  | -0.33 |
| GB12951-RA [PREDICTED: Apis mellifera similar to 14-3-3 CG17870-PC, isoform C, transcript variant 1 (LOC408289), mRNA]                                                                                | 1.71E-01 | -0.30 | 0.05  |
| GB12951-RA [PREDICTED: Apis mellifera similar to 14-3-3 CG17870-PC, isoform C, transcript variant 1 (LOC408289), mRNA]                                                                                | 1.71E-01 | -0.30 | 0.02  |
| GB12951-RA [PREDICTED: Apis mellifera similar to 14-3-3 CG17870-PC, isoform C, transcript variant 1 (LOC408289), mRNA]                                                                                | 1.71E-01 | -0.30 | 0.00  |
| GB18819-RA [Apis mellifera antennal-specific protein 3c precursor (Asp3c), mRNA]                                                                                                                      | 1.77E-01 | 1.31  | -0.17 |
| GB19923-RA [PREDICTED: Apis mellifera similar to Cathepsin L precursor (Cysteine proteinase 1) (LOC552756), mRNA]                                                                                     | 1.78E-01 | 0.68  | 0.21  |
| GB11983-RA [PREDICTED: Apis mellifera similar to Angiotensin converting enzyme CG8827-PA, isoform A (LOC410074), mRNA]                                                                                | 1.79E-01 | 0.21  | 0.55  |
| GB11768-RA [Apis mellifera major royal jelly protein 4 (Mrjp4), mRNA]                                                                                                                                 | 1.82E-01 | 1.51  | -0.02 |
| GB11768-RA [Apis mellifera major royal jelly protein 4 (Mrjp4), mRNA]                                                                                                                                 | 1.82E-01 | 1.51  | -0.07 |
| GB12375-RA [PREDICTED: Apis mellifera similar to Chd64 CG14996-PB (LOC408572), mRNA]                                                                                                                  | 1.84E-01 | -0.26 | 0.25  |
| GB19961-RA [PREDICTED: Apis mellifera similar to Gram-negative bacteria binding protein 1 CG6895-PA (LOC725832), mRNA]                                                                                | 1.88E-01 | 0.49  | 0.49  |
| GB14798-RA [PREDICTED: Apis mellifera similar to Glyceraldehyde 3 phosphate dehydrogenase 1 CG12055-PA, isoform A, transcript variant 2 (LOC410122), mRNA]                                            | 1.89E-01 | -0.56 | -0.05 |
| GB11892-RA [PREDICTED: Apis mellifera similar to Glycogen phosphorylase, transcript variant 2 (LOC409267), mRNA]                                                                                      | 1.92E-01 | -0.55 | 0.10  |
| GB17761-RA [PREDICTED: Apis mellifera similar to CG30069-PA (LOC408677), mRNA]                                                                                                                        | 1.95E-01 | -0.43 | 0.12  |
| GB12857-RA [PREDICTED: Apis mellifera similar to CG3009-PA (LOC409277), partial mRNA]                                                                                                                 | 1.96E-01 | -0.34 | 0.10  |
| GB10776-RA [PREDICTED: Apis mellifera similar to glycerol-3-phosphate dehydrogenase 1-like (LOC724574), mRNA]                                                                                         | 1.96E-01 | -0.47 | 0.37  |
| GB15988-RA [PREDICTED: Apis mellifera similar to Collagen alpha-1(II) chain precursor (LOC410038), partial mRNA]                                                                                      | 2.03E-01 | 0.16  | -0.45 |
| GB16882-RA [PREDICTED: Apis mellifera similar to walrus CG8996-PB, isoform B, transcript variant 1 (LOC551710), mRNA]                                                                                 | 2.09E-01 | -0.83 | 0.43  |
| GB13613-RA [PREDICTED: Apis mellifera similar to Larval serum protein 2 CG6806-PA (LOC409354), mRNA]                                                                                                  | 2.09E-01 | -0.43 | -0.06 |
| GB13004-RA [PREDICTED: Apis mellifera similar to CG12163-PA, isoform A (LOC408851), mRNA]                                                                                                             | 2.19E-01 | 0.42  | -0.30 |
| GB19452-RA                                                                                                                                                                                            | 2.19E-01 | 0.24  | 0.46  |
| GB14141-RA [PREDICTED: Apis mellifera similar to cheerio CG3937-PD, isoform D (LOC409697), mRNA]                                                                                                      | 2.22E-01 | -0.38 | 0.16  |
| GB17038-RA [PREDICTED: Apis mellifera similar to CG5703-PA (LOC409793), mRNA]                                                                                                                         | 2.28E-01 | -0.58 | 0.11  |
| GB18498-RA [PREDICTED: Apis mellifera enoyl Coenzyme A hydratase, short chain, 1, mitochondrial (Echs1), mRNA]                                                                                        | 2.30E-01 | -0.16 | 0.93  |
| GB15629-RA [PREDICTED: Apis mellifera similar to ATP synthase O subunit, mitochondrial precursor (Oligomycin sensitivity conferral protein) (OSCP) (LOC409236), mRNA]                                 | 2.34E-01 | -0.70 | -0.02 |
| GB15494-RA [PREDICTED: Apis mellifera hypothetical protein LOC724582 (LOC724582), mRNA]                                                                                                               | 2.34E-01 | 0.40  | 0.47  |
| GB19004-RA [PREDICTED: Apis mellifera similar to CG4169-PA (LOC552671), mRNA]                                                                                                                         | 2.51E-01 | -0.82 | 0.16  |
| GB15399-RA [PREDICTED: Apis mellifera similar to prefoldin subunit 2 (LOC726085), mRNA]                                                                                                               | 2.53E-01 | -0.49 | -0.07 |
| GB16287-RA [PREDICTED: Apis mellifera similar to K06A9.1b (LOC408445), mRNA]                                                                                                                          | 2.58E-01 | -0.65 | -0.24 |
| GB12384-RA [PREDICTED: Apis mellifera similar to CG10467-PA (LOC552086), mRNA]                                                                                                                        | 2.59E-01 | 0.67  | 1.15  |
| GB11461-RA [PREDICTED: Apis mellifera similar to UGP CG4347-PA, isoform A, transcript variant 1 (LOC412069), mRNA]                                                                                    | 2.64E-01 | -0.32 | 0.59  |
| GB18404-RA [PREDICTED: Apis mellifera similar to CG2862-PA, isoform A (LOC552670), mRNA]                                                                                                              | 2.64E-01 | -0.60 | 0.34  |
| GB19293-RA [PREDICTED: Apis mellifera mitochondrial cytochrome C (CytC), mRNA]                                                                                                                        | 2.66E-01 | -0.47 | 0.05  |
| GB19503-RA [PREDICTED: Apis mellifera similar to heat shock protein 8, transcript variant 1 (LOC410620), mRNA]                                                                                        | 2.66E-01 | -0.28 | -0.06 |
| GB18960-RA [PREDICTED: Apis mellifera similar to CG6439-PA (LOC552128), mRNA]                                                                                                                         | 2.67E-01 | -0.78 | 0.01  |
| GB19207-RA [PREDICTED: Apis mellifera hypothetical LOC408695 (LOC408695), mRNA]                                                                                                                       | 2.72E-01 | -0.39 | -0.40 |
| GB12718-RA [PREDICTED: Apis mellifera hypothetical protein LOC727264 (LOC727264), mRNA]                                                                                                               | 2.77E-01 | 0.33  | 0.21  |
| GB17056-RA [PREDICTED: Apis mellifera similar to Cyclophilin 1 CG9916-PA (LOC409890), mRNA]                                                                                                           | 2.80E-01 | 0.22  | 0.55  |
| GB17056-RA [PREDICTED: Apis mellifera similar to Cyclophilin 1 CG9916-PA (LOC409890), mRNA]                                                                                                           | 2.80E-01 | 0.22  | 0.72  |
| [Antisense] GB17056-RA [PREDICTED: Apis mellifera similar to Cyclophilin 1 CG9916-PA (LOC409890), mRNA]                                                                                               | 2.80E-01 | 0.22  | 0.07  |
| GB10139-RA [PREDICTED: Apis mellifera similar to Glutamine synthetase 2 CG1743-PC, isoform C (LOC410066), mRNA]                                                                                       | 2.91E-01 | -0.47 | 0.40  |
| GB10514-RA [PREDICTED: Apis mellifera similar to Tubulin alpha-1 chain (LOC408388), mRNA]                                                                                                             | 2.93E-01 | 0.63  | 0.02  |
| GB11056-RA [PREDICTED: Apis mellifera similar to Phosphoglycerate kinase, transcript variant 1 (LOC411576), mRNA]                                                                                     | 2.95E-01 | -0.54 | -0.08 |
| GB18538-RA                                                                                                                                                                                            | 2.96E-01 | 1.81  | -0.13 |
| GB18299-RA [PREDICTED: Apis mellifera similar to capricious CG11282-PA, isoform A (LOC726414), mRNA]                                                                                                  | 2.97E-01 | 0.37  | -0.12 |
| GB11202-RA [PREDICTED: Apis mellifera similar to Laminin A CG10236-PA (LOC412663), partial mRNA]                                                                                                      | 2.97E-01 | 0.28  | NA    |
| GB11814-RA [PREDICTED: Apis mellifera similar to CG31974-PA (LOC725439), mRNA]                                                                                                                        | 2.99E-01 | -0.96 | 0.22  |
| GB19811-RA [Apis mellifera take-out-like carrier protein (JHBP-1), mRNA]                                                                                                                              | 3.01E-01 | 0.59  | 0.97  |
| GB10917-RA [PREDICTED: Apis mellifera similar to Protein-glutamine gamma-glutamyltransferase K (Transglutaminase K) (TGase K) (TGK) (TG(K)) (Transglutaminase-1) (Epidermal TGase) (LOC409425), mRNA] | 3.06E-01 | 0.25  | -0.37 |

|                                                                                                                                                                          |          |       |       |
|--------------------------------------------------------------------------------------------------------------------------------------------------------------------------|----------|-------|-------|
| GB10972-RA [PREDICTED: Apis mellifera thioredoxin peroxidase, transcript variant 1 (Tpx-3), mRNA]                                                                        | 3.09E-01 | -0.57 | 0.30  |
| GB13559-RA [PREDICTED: Apis mellifera similar to CG7460-PB, transcript variant 1 (LOC413478), mRNA]                                                                      | 3.10E-01 | 0.29  | 0.50  |
| GB14138-RA [PREDICTED: Apis mellifera putative thioredoxin peroxidase (Gtpx-1), mRNA]                                                                                    | 3.16E-01 | -0.21 | -0.02 |
| GB19460-RA [PREDICTED: Apis mellifera similar to Aldolase CG6058-PF, isoform F (LOC550785), mRNA]                                                                        | 3.21E-01 | -3.32 | 0.51  |
| GB19460-RA [PREDICTED: Apis mellifera similar to Aldolase CG6058-PF, isoform F (LOC550785), mRNA]                                                                        | 3.21E-01 | -3.32 | 0.40  |
| GB11022-RA [Apis mellifera major royal jelly protein 7 (Mrjp7), mRNA]                                                                                                    | 3.29E-01 | 1.79  | 0.75  |
| GB19742-RA [PREDICTED: Apis mellifera similar to CG8369-PA (LOC408510), mRNA]                                                                                            | 3.32E-01 | 1.13  | -0.38 |
| GB13508-RA [PREDICTED: Apis mellifera similar to ubiquinol-cytochrome c reductase, Rieske iron-sulfur polypeptide 1 (LOC411183), mRNA]                                   | 3.33E-01 | -0.42 | -0.11 |
| GB15718-RA [PREDICTED: Apis mellifera similar to CG14207-PB, isoform B, transcript variant 1 (LOC408875), mRNA]                                                          | 3.33E-01 | -0.21 | 0.44  |
| GB10855-RA [PREDICTED: Apis mellifera similar to plasma glutamate carboxypeptidase, transcript variant 1 (LOC410149), mRNA]                                              | 3.34E-01 | 0.28  | -0.03 |
| GB19582-RA [PREDICTED: Apis mellifera similar to Serine protease inhibitor 5 CG18525-PA, isoform A (LOC413749), mRNA]                                                    | 3.41E-01 | 0.48  | 0.31  |
| GB17879-RA [PREDICTED: Apis mellifera similar to Peptidoglycan recognition protein SA CG11709-PA (LOC727472), mRNA]                                                      | 3.54E-01 | 0.51  | 1.84  |
| GB19200-RA [PREDICTED: Apis mellifera similar to Pros5 CG12323-PA, isoform A (LOC411206), mRNA]                                                                          | 3.54E-01 | -0.14 | 0.19  |
| GB12231-RA [PREDICTED: Apis mellifera similar to Ferritin 1 heavy chain homologue CG2216-PE, isoform E (LOC551651), mRNA]                                                | 3.56E-01 | -0.23 | 0.72  |
| GB14361-RA [PREDICTED: Apis mellifera similar to Larval serum protein 2 CG6806-PA (LOC551648), mRNA]                                                                     | 3.60E-01 | 2.27  | 2.60  |
| GB12562-RA [PREDICTED: Apis mellifera similar to CG10513-PA, transcript variant 1 (LOC408421), mRNA]                                                                     | 3.73E-01 | 0.43  | 0.09  |
| GB18637-RA [PREDICTED: Apis mellifera similar to F-actin capping protein subunit beta (LOC409581), mRNA]                                                                 | 3.73E-01 | -0.22 | 0.38  |
| GB14317-RA [PREDICTED: Apis mellifera similar to sidekick CG5227-PA, isoform A, transcript variant 2 (LOC551168), mRNA]                                                  | 3.78E-01 | -0.21 | 0.63  |
| GB14382-RA [PREDICTED: Apis mellifera similar to Neurexin IV CG6827-PB, isoform B (LOC551807), mRNA]                                                                     | 3.80E-01 | -0.12 | 0.07  |
| GB15052-RA [PREDICTED: Apis mellifera similar to Phosphoglyceromutase CG1721-PA, isoform A (LOC552736), mRNA]                                                            | 3.81E-01 | -0.42 | -0.28 |
| GB16246-RA [Apis mellifera major royal jelly protein 2 (Mrjp2), mRNA]                                                                                                    | 3.88E-01 | 0.82  | 0.22  |
| GB16246-RA [Apis mellifera major royal jelly protein 2 (Mrjp2), mRNA]                                                                                                    | 3.88E-01 | 0.82  | -0.50 |
| GB13821-RA [PREDICTED: Apis mellifera similar to CG3609-PA (LOC412231), mRNA]                                                                                            | 3.94E-01 | -0.18 | 0.07  |
| GB10275-RA [PREDICTED: Apis mellifera similar to -Tubulin at 56D CG9277-PB, isoform B (LOC408782), mRNA]                                                                 | 3.95E-01 | -0.36 | 0.32  |
| GB14205-RA [PREDICTED: Apis mellifera similar to CG11267-PA (LOC552531), mRNA]                                                                                           | 3.95E-01 | -0.75 | 1.16  |
| GB18727-RA [PREDICTED: Apis mellifera similar to CG5362-PA, transcript variant 1 (LOC411014), mRNA]                                                                      | 4.04E-01 | -0.14 | 0.27  |
| GB13967-RA [Apis mellifera venom protein 2 (LOC503505), mRNA]                                                                                                            | 4.10E-01 | 0.21  | 0.40  |
| GB12230-RA [PREDICTED: Apis mellifera hypothetical protein LOC406120 (LOC406120), mRNA]                                                                                  | 4.15E-01 | 0.23  | -0.23 |
| GB15172-RA [PREDICTED: Apis mellifera similar to lethal (1) G0255 CG4094-PA, isoform A (LOC724321), mRNA]                                                                | 4.16E-01 | -0.56 | 0.42  |
| GB18892-RA [PREDICTED: Apis mellifera similar to hydroxyacylglutathione hydrolase, transcript variant 1 (LOC551059), mRNA]                                               | 4.17E-01 | -0.68 | -0.14 |
| GB16881-RA [Apis mellifera troponin T (TpnT), mRNA]                                                                                                                      | 4.22E-01 | -0.59 | -0.19 |
| GB18764-RA [PREDICTED: Apis mellifera similar to translation elongation factor 1-gamma, transcript variant 2 (LOC551211), mRNA]                                          | 4.26E-01 | -0.28 | -0.01 |
| GB12636-RA [PREDICTED: Apis mellifera hypothetical LOC409716 (LOC409716), mRNA]                                                                                          | 4.26E-01 | -0.24 | NA    |
| GB12573-RA [PREDICTED: Apis mellifera similar to lethal (1) G0030 CG3861-PA, isoform A (LOC410059), mRNA]                                                                | 4.27E-01 | -0.47 | 0.12  |
| [Antisense] GB13237-RA [PREDICTED: Apis mellifera similar to Phosphogluconate mutase CG5165-PA (LOC411897), mRNA]                                                        | 4.28E-01 | -0.23 | -0.13 |
| GB13237-RA [PREDICTED: Apis mellifera similar to Phosphogluconate mutase CG5165-PA (LOC411897), mRNA]                                                                    | 4.28E-01 | -0.23 | 0.20  |
| GB17035-RA [PREDICTED: Apis mellifera similar to CG15828-PB, isoform B (LOC410793), mRNA]                                                                                | 4.33E-01 | 0.19  | -0.06 |
| GB17538-RA [Apis mellifera hymenoptaecin (LOC406142), mRNA]                                                                                                              | 4.45E-01 | -0.66 | 0.20  |
| GB19380-RA [PREDICTED: Apis mellifera similar to thioredoxin peroxidase 1 CG1633-PA, isoform A, transcript variant 1 (LOC409954), mRNA]                                  | 4.64E-01 | -0.19 | 0.32  |
| GB14424-RA [PREDICTED: Apis mellifera similar to Nidogen/entactin CG12908-PA, isoform A (LOC408797), mRNA]                                                               | 4.65E-01 | 0.36  | 0.30  |
| GB16429-RA [PREDICTED: Apis mellifera similar to Glucose-6-phosphate isomerase (GPI) (Phosphoglucose isomerase) (PGI) (Phosphohexose isomerase) (PHI) (LOC551154), mRNA] | 4.67E-01 | -0.23 | 0.17  |
| GB16561-RA [PREDICTED: Apis mellifera similar to Saposin-related CG12070-PA, isoform A, transcript variant 1 (LOC408808), mRNA]                                          | 4.72E-01 | 0.20  | -0.12 |
| GB17531-RA [PREDICTED: Apis mellifera similar to Dihydropteridine reductase CG4665-PA, isoform A (LOC409160), mRNA]                                                      | 4.82E-01 | 0.21  | 0.57  |
| GB18626-RA [PREDICTED: Apis mellifera similar to CG15006-PA (LOC552627), mRNA]                                                                                           | 4.90E-01 | -0.33 | -0.19 |
| [Antisense] GB18626-RA [PREDICTED: Apis mellifera similar to CG15006-PA (LOC552627), mRNA]                                                                               | 4.90E-01 | -0.33 | 0.01  |
| GB18626-RA [PREDICTED: Apis mellifera similar to CG15006-PA (LOC552627), mRNA]                                                                                           | 4.90E-01 | -0.33 | -0.22 |

|                                                                                                                                                                                                      |          |       |       |
|------------------------------------------------------------------------------------------------------------------------------------------------------------------------------------------------------|----------|-------|-------|
| GB10498-RA [PREDICTED: Apis mellifera similar to Peroxiredoxin 2540 CG11765-PA (LOC551975), mRNA]                                                                                                    | 5.07E-01 | 0.21  | 0.68  |
| GB14107-RA [PREDICTED: Apis mellifera similar to germinal histone H4 (LOC726520), mRNA]                                                                                                              | 5.21E-01 | -0.17 | 0.36  |
| GB16459-RA [Apis mellifera major royal jelly protein 3 (Mrjp3), mRNA]                                                                                                                                | 5.41E-01 | 1.83  | -0.06 |
| GB16169-RA [PREDICTED: Apis mellifera similar to CG3305-PA, transcript variant 2 (LOC409495), mRNA]                                                                                                  | 5.43E-01 | 0.29  | 0.07  |
| GB14852-RA [PREDICTED: Apis mellifera similar to heat shock protein 8, transcript variant 1 (LOC409418), mRNA]                                                                                       | 5.49E-01 | -0.09 | -0.04 |
| GB19509-RA [PREDICTED: Apis mellifera similar to SRY interacting protein 1 CG10939-PA (LOC413207), mRNA]                                                                                             | 5.58E-01 | -0.32 | 0.05  |
| GB19501-RA [PREDICTED: Apis mellifera similar to CG5023-PA (LOC408532), mRNA]                                                                                                                        | 5.62E-01 | 0.11  | 0.01  |
| GB16807-RA [PREDICTED: Apis mellifera similar to CG9518-PA (LOC410733), mRNA]                                                                                                                        | 5.81E-01 | 0.61  | 0.15  |
| GB15202-RA [PREDICTED: Apis mellifera similar to dj-1 CG1349-PA (LOC551882), mRNA]                                                                                                                   | 5.89E-01 | -0.20 | -0.11 |
| GB13279-RA [PREDICTED: Apis mellifera similar to Tropomyosin-2 (Tropomyosin I) (LOC413204), mRNA]                                                                                                    | 5.96E-01 | -0.43 | NA    |
| GB18109-RA [PREDICTED: Apis mellifera similar to CG6084-PA, isoform A, transcript variant 1 (LOC551968), mRNA]                                                                                       | 5.97E-01 | 0.22  | 1.60  |
| GB18955-RA [PREDICTED: Apis mellifera similar to Phospholipid hydroperoxide glutathione peroxidase, mitochondrial precursor (PHGPx) (GPX-4) (LOC726269), mRNA]                                       | 6.07E-01 | -0.12 | -0.39 |
| GB16500-RA [PREDICTED: Apis mellifera similar to 40S ribosomal protein S3a (C3 protein) (LOC413296), mRNA]                                                                                           | 6.10E-01 | 0.36  | -0.29 |
| GB14710-RA [PREDICTED: Apis mellifera similar to CG4572-PB, isoform B (LOC410451), mRNA]                                                                                                             | 6.13E-01 | 0.07  | -0.04 |
| GB15016-RA [PREDICTED: Apis mellifera similar to Heat shock protein cognate 3 CG4147-PA, isoform A (LOC409587), mRNA]                                                                                | 6.20E-01 | 0.09  | 0.16  |
| GB17384-RA [PREDICTED: Apis mellifera similar to Ccp84Ag CG2342-PA (LOC409345), mRNA]                                                                                                                | 6.21E-01 | 0.32  | -0.02 |
| GB17384-RA [PREDICTED: Apis mellifera similar to Ccp84Ag CG2342-PA (LOC409345), mRNA]                                                                                                                | 6.21E-01 | 0.32  | -0.10 |
| GB16903-RA [PREDICTED: Apis mellifera similar to cathD CG1548-PA (LOC409341), mRNA]                                                                                                                  | 6.21E-01 | 0.06  | 0.02  |
| GB10133-RA [PREDICTED: Apis mellifera CuZn superoxide dismutase, transcript variant 1 (Sod1), mRNA]                                                                                                  | 6.23E-01 | -0.17 | 0.03  |
| GB10351-RA [PREDICTED: Apis mellifera similar to CG17331-PA, transcript variant 1 (LOC409978), mRNA]                                                                                                 | 6.23E-01 | -0.37 | 0.10  |
| GB16526-RA [PREDICTED: Apis mellifera similar to Proteasome subunit alpha type 5 (Proteasome zeta chain) (Macropain zeta chain) (Multicatalytic endopeptidase complex zeta chain) (LOC551956), mRNA] | 6.26E-01 | 0.06  | 0.28  |
| GB10973-RA [Apis mellifera arginine kinase (Argk), mRNA]                                                                                                                                             | 6.38E-01 | -0.08 | 0.58  |
| GB20101-RA [PREDICTED: Apis mellifera similar to CG4893-PA, transcript variant 1 (LOC411570), mRNA]                                                                                                  | 6.42E-01 | 0.44  | 0.41  |
| GB18905-RA [PREDICTED: Apis mellifera similar to proteasome (prosome, macropain) subunit, beta type, 6 (LOC409831), mRNA]                                                                            | 6.56E-01 | -0.28 | 0.34  |
| GB17251-RA [PREDICTED: Apis mellifera similar to Nucleoside diphosphate kinase (NDK) (NDP kinase) (Abnormal wing disks protein) (Killer of prune protein) (LOC409861), mRNA]                         | 6.61E-01 | -0.21 | 0.23  |
| GB19075-RA [PREDICTED: Apis mellifera similar to CG3153-PB, isoform B (LOC725038), mRNA]                                                                                                             | 6.65E-01 | 0.33  | -0.30 |
| GB10560-RA [Apis mellifera translation elongation factor eEF-1 alpha chain (LOC408385), mRNA]                                                                                                        | 6.71E-01 | -0.13 | 0.40  |
| GB15536-RA [PREDICTED: Apis mellifera similar to CG5397-PA (LOC410187), mRNA]                                                                                                                        | 6.82E-01 | 0.09  | 0.27  |
| GB11150-RA [PREDICTED: Apis mellifera similar to CG3560-PA (LOC551757), mRNA]                                                                                                                        | 6.86E-01 | -0.26 | 0.09  |
| GB15619-RA [PREDICTED: Apis mellifera similar to CG8036-PB, isoform B, transcript variant 1 (LOC550804), mRNA]                                                                                       | 6.93E-01 | 0.11  | 0.65  |
| GB18363-RA [Apis mellifera odorant binding protein 13 (Obp13), mRNA]                                                                                                                                 | 6.97E-01 | 0.15  | 0.43  |
| GB11665-RA [PREDICTED: Apis mellifera similar to Imaginal disc growth factor 4 CG1780-PA, isoform A (LOC413324), mRNA]                                                                               | 7.10E-01 | 0.19  | 0.75  |
| GB16162-RA [PREDICTED: Apis mellifera similar to CG8498-PA (LOC411272), mRNA]                                                                                                                        | 7.10E-01 | 0.07  | 0.25  |
| GB14758-RA [PREDICTED: Apis mellifera similar to heat shock protein 90-alpha, transcript variant 1 (LOC408928), mRNA]                                                                                | 7.12E-01 | -0.07 | 0.66  |
| GB19247-RA [PREDICTED: Apis mellifera similar to Elongation factor 2 (EF-2), transcript variant 1 (LOC409167), mRNA]                                                                                 | 7.26E-01 | -0.07 | -0.25 |
| GB16716-RA [PREDICTED: Apis mellifera similar to CG8561-PA (LOC725041), mRNA]                                                                                                                        | 7.37E-01 | 0.17  | 0.05  |
| GB12098-RA [PREDICTED: Apis mellifera similar to CG8773-PA (LOC550831), partial mRNA]                                                                                                                | 7.38E-01 | -0.04 | 0.01  |
| GB16806-RA [PREDICTED: Apis mellifera similar to CG15040-PA (LOC725387), mRNA]                                                                                                                       | 7.40E-01 | 0.09  | 0.17  |
| GB14645-RA [PREDICTED: Apis mellifera similar to CG6124-PA (LOC724421), mRNA]                                                                                                                        | 7.41E-01 | -0.37 | 0.02  |
| GB14520-RA [PREDICTED: Apis mellifera similar to Fasciclin 2 CG3665-PB, isoform B, transcript variant 1 (LOC409849), mRNA]                                                                           | 7.42E-01 | 0.18  | -0.24 |
| GB19017-RA [Apis mellifera alpha-glucosidase (LOC406131), mRNA]                                                                                                                                      | 7.45E-01 | 0.41  | 0.10  |
| GB14705-RA [PREDICTED: Apis mellifera similar to Adenylosuccinate synthetase (IMP--aspartate ligase) (AdSS) (AMPSase) (LOC409299), mRNA]                                                             | 7.48E-01 | -0.12 | -0.04 |
| GB11846-RA [PREDICTED: Apis mellifera similar to Neuroglian CG1634-PA, isoform A (LOC411829), mRNA]                                                                                                  | 7.92E-01 | -0.03 | -0.01 |
| GB17444-RA [PREDICTED: Apis mellifera similar to CG32521-PA, isoform A (LOC725926), mRNA]                                                                                                            | 8.01E-01 | 0.04  | 0.64  |
| GB16582-RA [PREDICTED: Apis mellifera hypothetical protein LOC725175 (LOC725175), mRNA]                                                                                                              | 8.02E-01 | -0.11 | 0.06  |
| GB14888-RA [Apis mellifera major royal jelly protein 1 (Mrjp1), mRNA]                                                                                                                                | 8.02E-01 | 0.50  | NA    |
| GB10836-RA [PREDICTED: Apis mellifera similar to Hsc70Cb CG6603-PA, isoform A, transcript variant 1 (LOC408706), mRNA]                                                                               | 8.02E-01 | -0.09 | 0.02  |
| GB10889-RA [PREDICTED: Apis mellifera similar to CG5080-PB, isoform B (LOC413792), partial mRNA]                                                                                                     | 8.03E-01 | -0.04 | 0.72  |
| GB13668-RA [PREDICTED: Apis mellifera hypothetical LOC552675 (LOC552675), mRNA]                                                                                                                      | 8.04E-01 | -0.16 | -0.24 |
| GB13722-RA [PREDICTED: Apis mellifera similar to Y4C6B.6 (LOC409709), mRNA]                                                                                                                          | 8.07E-01 | 0.35  | -0.18 |
| GB19068-RA [PREDICTED: Apis mellifera similar to Lysosomal Pro-X carboxypeptidase precursor (Prolylcarboxypeptidase) (PRCP) (Proline carboxypeptidase) (Angiotensinase C) (Lysosomal                 | 8.08E-01 | 0.03  | 0.25  |

|                                                                                                                                                                                                                                                                  |          |       |       |
|------------------------------------------------------------------------------------------------------------------------------------------------------------------------------------------------------------------------------------------------------------------|----------|-------|-------|
| carboxypeptidase C) (LOC551273), mRNA]                                                                                                                                                                                                                           |          |       |       |
| GB12956-RA [PREDICTED: Apis mellifera similar to yippee interacting protein 2 CG4600-PA (LOC408291), mRNA]                                                                                                                                                       | 8.10E-01 | -0.01 | 0.55  |
| GB14247-RA [PREDICTED: Apis mellifera similar to easter CG4920-PA (LOC726256), mRNA]                                                                                                                                                                             | 8.14E-01 | 0.10  | 0.29  |
| GB19418-RA [Apis mellifera glucose oxidase (LOC406081), mRNA]                                                                                                                                                                                                    | 8.19E-01 | 0.75  | NA    |
| GB19418-RA [Apis mellifera glucose oxidase (LOC406081), mRNA]                                                                                                                                                                                                    | 8.19E-01 | 0.75  | NA    |
| GB16153-RA [PREDICTED: Apis mellifera similar to Papilin CG33103-PB, isoform B, transcript variant 1 (LOC413021), mRNA]                                                                                                                                          | 8.21E-01 | -0.08 | -0.06 |
| GB15816-RA [PREDICTED: Apis mellifera similar to Cytochrome c oxidase polypeptide Va, mitochondrial precursor (LOC408837), mRNA]                                                                                                                                 | 8.26E-01 | 0.62  | 0.17  |
| GB15044-RA [PREDICTED: Apis mellifera similar to CG6180-PA, transcript variant 1 (LOC408516), mRNA]                                                                                                                                                              | 8.30E-01 | -0.09 | 0.30  |
| GB17818-RA [PREDICTED: Apis mellifera hypothetical protein LOC724771 (LOC724771), mRNA]                                                                                                                                                                          | 8.32E-01 | 0.02  | NA    |
| GB13351-RA [Apis mellifera phospholipase A2 (Pla2), mRNA]                                                                                                                                                                                                        | 8.41E-01 | 0.18  | 0.96  |
| GB16927-RA [PREDICTED: Apis mellifera hypothetical LOC408280 (LOC408280), mRNA]                                                                                                                                                                                  | 8.49E-01 | -0.06 | 0.66  |
| GB12538-RA [PREDICTED: Apis mellifera similar to Tequila CG4821-PA, isoform A (LOC724971), mRNA]                                                                                                                                                                 | 8.54E-01 | 0.16  | 0.15  |
| GB18159-RA [PREDICTED: Apis mellifera similar to PTK7 protein tyrosine kinase 7 isoform a precursor (LOC410685), mRNA]                                                                                                                                           | 8.58E-01 | -0.08 | NA    |
| GB11298-RA                                                                                                                                                                                                                                                       | 8.62E-01 | 0.11  | 0.31  |
| GB10411-RA [PREDICTED: Apis mellifera similar to Proteasome subunit alpha type 7-1 (Proteasome 28 kDa subunit 1) (PROS-Dm28.1), transcript variant 1 (LOC410095), mRNA]                                                                                          | 8.70E-01 | 0.03  | -0.02 |
| GB11503-RA [PREDICTED: Apis mellifera similar to CG5195-PA (LOC724779), mRNA]                                                                                                                                                                                    | 8.81E-01 | 0.06  | 0.11  |
| GB13042-RA [PREDICTED: Apis mellifera similar to Flavin-containing monooxygenase 1 CG3006-PA (LOC410687), mRNA]                                                                                                                                                  | 8.84E-01 | -0.02 | 0.65  |
| GB10989-RA [PREDICTED: Apis mellifera similar to Vacuolar ATP synthase catalytic subunit A, osteoclast isoform (V-ATPase subunit A 2) (Vacuolar proton pump alpha subunit 2) (V-ATPase 69 kDa subunit 2) (Isoform HO68), transcript variant 1 (LOC551093), mRNA] | 9.04E-01 | -0.02 | 0.06  |
| GB15518-RA [PREDICTED: Apis mellifera similar to CG9380-PA, isoform A (LOC552843), mRNA]                                                                                                                                                                         | 9.06E-01 | -0.01 | -0.55 |
| GB14191-RA [PREDICTED: Apis mellifera similar to Proteasome subunit beta type 1 (Proteasome 26 kDa subunit) (LOC411695), mRNA]                                                                                                                                   | 9.17E-01 | 0.08  | 0.09  |
| GB17645-RA [PREDICTED: Apis mellifera similar to CG7453-PB, isoform B (LOC724585), mRNA]                                                                                                                                                                         | 9.18E-01 | 0.02  | 0.36  |
| [Antisense] GB16236-RA [PREDICTED: Apis mellifera similar to pericardin CG5700-PB (LOC552446), mRNA]                                                                                                                                                             | 9.42E-01 | -0.03 | NA    |
| GB16236-RA [PREDICTED: Apis mellifera similar to pericardin CG5700-PB (LOC552446), mRNA]                                                                                                                                                                         | 9.42E-01 | -0.03 | 0.83  |
| GB16236-RA [PREDICTED: Apis mellifera similar to pericardin CG5700-PB (LOC552446), mRNA]                                                                                                                                                                         | 9.42E-01 | -0.03 | 0.78  |
| GB11810-RA [PREDICTED: Apis mellifera similar to Contactin CG1084-PA (LOC412312), mRNA]                                                                                                                                                                          | 9.60E-01 | 0.00  | -0.03 |
| GB19030-RA [PREDICTED: Apis mellifera similar to CG10638-PA, isoform A, transcript variant 1 (LOC552018), mRNA]                                                                                                                                                  | 9.69E-01 | 0.01  | 0.77  |
| GB10717-RA [PREDICTED: Apis mellifera similar to Muscle protein 20 CG4696-PA, isoform A (LOC408972), mRNA]                                                                                                                                                       | 9.73E-01 | 0.01  | -0.76 |
| GB19425-RA [PREDICTED: Apis mellifera similar to Hsp70/Hsp90 organizing protein homolog CG2720-PA, transcript variant 1 (LOC411002), mRNA]                                                                                                                       | 9.89E-01 | -0.01 | 0.29  |
| GB16914-RA [PREDICTED: Apis mellifera similar to Ribosomal protein L14 CG6253-PA (LOC409290), mRNA]                                                                                                                                                              | 9.89E-01 | 0.00  | -0.59 |
